1 **Double Stranded DNA Breaks and Genome Editing Trigger Ribosome Remodeling**  
2 **and Translational Shutdown**

3

4 Celeste Riepe<sup>1,6</sup>, Elena Zelin<sup>2,6</sup>, Stacia K. Wyman<sup>2</sup>, David N. Nguyen<sup>3,4</sup>, Jin Rui Liang<sup>2,5</sup>,  
5 Phillip A. Frankino<sup>1</sup>, Zuriah A. Meacham<sup>1</sup>, Jonathan T. Vu<sup>2</sup>, Alexander Marson<sup>3,4</sup>,  
6 Nicholas T. Ingolia<sup>1,7</sup>, Jacob E. Corn<sup>1,2,5,7,8</sup>

7

8 <sup>1</sup>Department of Molecular and Cell Biology, University of California, Berkeley, Berkeley,  
9 California, 94720, USA

10 <sup>2</sup>Innovative Genomics Institute, University of California, Berkeley, Berkeley, California,  
11 94704, USA

12 <sup>3</sup>Department of Microbiology and Immunology, University of California, San Francisco  
13 Medical Center, San Francisco, California, 94143, USA

14 <sup>4</sup>Innovative Genomics Institute, University of California, San Francisco, San Francisco,  
15 California, 94143, USA

16 <sup>5</sup>Present address: Department of Biology, ETH, Zurich, Switzerland

17 <sup>6</sup>Co-first authors

18 <sup>7</sup>Co-corresponding authors: [ingolia@berkeley.edu](mailto:ingolia@berkeley.edu), [jacob.corn@biol.ethz.ch](mailto:jacob.corn@biol.ethz.ch)

19 <sup>8</sup>Lead contact: [jacob.corn@biol.ethz.ch](mailto:jacob.corn@biol.ethz.ch)

20

## 21 **Summary**

22           DNA damage activates a robust transcriptional stress response, but much less is  
23 known about how DNA impacts translation. The advent of genome editing via a Cas9-  
24 induced DNA double-strand break has intensified interest in understanding cellular  
25 responses to DNA damage. Here we find that DNA double-strand breaks (DSBs)  
26 induced by Cas9 or other damaging agents lead to a reduction of core ribosomal  
27 proteins, RPS27A and RPL40, and that the loss of these proteins is post-transcriptional  
28 and p53-independent. DSBs furthermore lead to the shutdown of translation through  
29 phosphorylation of eukaryotic initiation factor 2 alpha, and altering these signals affects  
30 genome editing outcomes. This DSB translational response is widespread and  
31 precedes the transcriptional response. Our results demonstrate that even a single  
32 double-strand break can lead to ribosome remodeling and reduced translational output,  
33 and suggest caution in interpreting cellular phenotypes measured immediately after  
34 genome editing.

## 35 **Introduction**

36           Unrepaired DNA damage can lead to lethal mutations and contributes to cancer  
37 initiation and progression. Cells have thus evolved a variety of responses to protect their  
38 genomes from a myriad of chemical and environmental insults. Double-strand breaks  
39 pose a particularly acute danger, as they may cause the wholesale loss of genetic  
40 information and require dramatic repair processes. In humans, cells with double-strand  
41 breaks arrest until repair is completed and undergo programmed cell death if repair is  
42 unsuccessful.

43           Double-strand breaks provoke a distinctive transcriptional response. Activation of  
44 the transcription factor p53 is a hallmark of the DSB response, leading to transcriptional  
45 reprogramming, cell cycle arrest, or in cases of severe damage, apoptosis (Joerger and  
46 Fersht, 2016). Deficiency in p53 signaling is also pivotal to the progression of many  
47 cancers, allowing neoplasms to accumulate DNA damage that results in mutations rapid  
48 tumor evolution. In addition to its critical role in maintaining genomic integrity, the  
49 cellular response to DSBs is essential to genome editing methods like CRISPR-Cas9.  
50 Cas9 editing relies on introducing a targeted double-strand break within a genome,  
51 which the cell repairs through error-prone non-homologous end joining (NHEJ) or  
52 through templated, homology directed repair (HDR). HDR from even a single Cas9-  
53 mediated DSB can induce low levels of p53 signaling, which can have negative  
54 consequences for cell fitness and genome editing outcomes (Haapaniemi et al., 2018;  
55 Ihry et al., 2018).

56           Although DSBs are known to initiate transcriptional changes, less is understood  
57 about the role of translation in the DNA damage response. A purely transcriptional

58 reaction to a genetic insult leaves a gap in response, potentially exposing a cell to the  
59 impact of damaged DNA during a critical time window in which damage had raised an  
60 alarm but newly transcribed mRNAs have not accumulated. While transcriptional  
61 changes can modulate protein abundance hours or days after a genomic insult,  
62 translational control can enact regulatory programs within minutes of an environmental  
63 stress (Andreev et al., 2015; Sidrauski et al., 2015).

64 We thus sought to characterize how cells respond to DNA damage at the  
65 translation level, and in particular, how cells respond to a single double-strand break  
66 during Cas9-mediated genome editing. We serendipitously found that cells temporarily  
67 deplete core ribosomal proteins, RPS27A and RPL40, in response to dsDNA damage.  
68 RPS27A and RPL40 are regulated post-transcriptionally and in a p53-independent  
69 manner, and their depletion persists days after the initial genomic lesion with Cas9. We  
70 also found that both non-specific double-strand breaks as well as single, targeted  
71 double-strand breaks reduce translation via eukaryotic initiation factor 2 alpha (eIF2 $\alpha$ )  
72 phosphorylation, and that modulating the downstream effects of eIF2 $\alpha$  phosphorylation  
73 during Cas9 editing leads to different repair outcomes. Ribosome profiling and RNA-seq  
74 data from Cas9-edited cells suggest that cells mount a translation response to dsDNA  
75 damage that precedes transcriptional changes. Our data demonstrate that Cas9-  
76 mediated genome editing can trigger temporary ribosome remodeling and translational  
77 shutdown in response to DNA double-strand breaks.

## 78 **Results**

### 79 **Ribosome proteins RPS27A and RPL40 are downregulated after genome editing** 80 **with Cas9**

81 While investigating changes in ubiquitin gene expression after DNA damage, we  
82 serendipitously observed that the two ribosomal proteins encoded as fusion proteins  
83 with ubiquitin, RPS27A (eS31) and RPL40 (eL40), are downregulated after Cas9-guide  
84 RNA (gRNA) ribonucleoprotein (RNP) nucleofection (**Figure 1A**). This downregulation  
85 was apparent as late as 48-72 hours after nucleofection, even though at this point Cas9  
86 was largely absent from the cell (**Figure 1B**) and genomic formation of indels was  
87 completed (**Figure 1C**). We found that RPS27A levels recovered 96 hours after  
88 nucleofection and RPL40 levels were beginning to increase within 72 hours (**Figure**  
89 **1A**), suggesting that the cell resets protein expression three to four days after editing  
90 (**Figure S1A**).

91 Downregulation of RPS27A and RPL40 depended on the DNA double-strand  
92 break, as catalytically inactive dCas9 did not provoke a similar response (**Figure 1A**).  
93 The guide RNA used in this experiment targeted a non-coding region of the *JAK2* gene  
94 (sgIntron), and *JAK2* levels remain unchanged after Cas9 nucleofection (**Figure S1B**).  
95 Our data therefore suggest that the loss of ribosomal subunits was due to the break  
96 itself and not disruption of *JAK2*. This days-long response was striking, as Cas9-  
97 mediated genome editing is often assumed to be relatively benign beyond the effects of  
98 the genomic sequence change itself.

99           We next asked whether ribosomal protein depletion was a specific response to  
100 DSBs versus other genomic lesions. We found that the loss of RPS27A and RPL40  
101 does not occur after non-DSB DNA damage such as alkylation (methyl  
102 methanesulfonate), oxidative damage (hydrogen peroxide), thymine dimers (ultraviolet  
103 radiation), or replication fork stalling (hydroxyurea) (**Figure 1D**). By contrast, both  
104 single, targeted DSBs caused by Cas9 RNP nucleofection and multiple, unspecific  
105 DSBs induced by the topoisomerase II inhibitors etoposide or doxorubicin reduced  
106 RPS27A and RPL40 levels. Therefore, the loss of RPL40 and RPS27A we observed  
107 after genome editing is caused by multiple DSB-inducing agents and is specific to  
108 DSBs.

109           As RPS27A and RPL40 are core components of the ribosome, we wondered  
110 whether intact ribosomes lacked these core components or if the reduction in levels of  
111 these proteins reflected changes in the pool of free ribosomal subunits. We used  
112 Western blotting of polysome profiling fractions to measure the abundance of different  
113 ribosomal proteins in small (40S) and large (60S) ribosome subunits, 80S monosomes,  
114 and polysomes from cells treated with DMSO or etoposide (**Figure 1E-F**). Strikingly,  
115 etoposide caused an accumulation of 80S monosomes and a reduction of actively  
116 translating polysomes. We found that RPS27A and RPL40 were absent from 80S  
117 monosomes and other ribosomal subunits after etoposide treatment, while the control  
118 ribosomal proteins RPS10 (eS10) and RPL10A (uL1) remained. The lack of RPS27A  
119 and RPL40 in 80S monosomes and polysomes suggests that they are absent from  
120 actively translating ribosomes, but we cannot rule out the hypothesis that monosomes  
121 are not translationally competent after DSBs and that actively translating ribosomes

122 require RPS27A and RPL40. In sum, we observe that DSBs cause an increase in 80S  
123 monosomes and reduction in translating polysomes, while RPS27A and RPL40 are lost  
124 from the translation machinery of etoposide-treated samples. Before investigating the  
125 DSB-induced accumulation of monosomes, we examined the mechanism by which  
126 RPS27A and RPL40 are lost after double-stranded DNA damage.

127

### 128 **Ubiquitins translated from *RPS27A* and *RPL40* decrease after dsDNA breaks**

129         Since RPS27A and RPL40 are translated as polypeptide fusions between an N-  
130 terminal ubiquitin moiety and a C-terminal ribosomal protein, we asked if ubiquitin  
131 moieties associated with RPS27A and RPL40 are depleted from dsDNA-damaged cells.  
132 The ubiquitin-ribosomal protein fusions are post-translationally processed into separate  
133 polypeptides, and cleavage presumably occurs prior to incorporation of RPL40 and  
134 RPS27A into the ribosome, as the N-termini of RPL40 and RPS27A are positioned near  
135 the elongation factor binding site and the A site of the decoding center, respectively  
136 (Ben-Shem et al., 2010; Rabl et al., 2011). Ubiquitins translated from the four human  
137 ubiquitin genes, *RPL40* (also known as *UBA52*), *RPS27A*, *UBC*, and *UBB* are  
138 indistinguishable at the amino acid level, and consequently, we employed Cas9-  
139 mediated genome engineering to introduce unique epitope tags to the N-terminal  
140 ubiquitins associated with these loci. We created endogenously-tagged clonal cell lines  
141 for three of the four human ubiquitin genes: *V5-RPL40*, *HA-RPS27A*, and *Myc-UBC*  
142 (**Figure 2A**). Each of the ubiquitins encoded by these genes has an identical amino  
143 acid sequence, but the unique tag allows us to individually track them.

144 Western blotting for each tag confirmed that the ubiquitin species from each  
145 edited locus could be uniquely tracked and incorporated into polyubiquitin chains  
146 (**Figure S2A**). We found that induction of either multiple DSBs with etoposide or a  
147 single DSB with a Cas9 RNP greatly reduced the abundance of the epitope-tagged  
148 ubiquitins translated from *V5-RPL40* and *HA-RPS27A* but had no effect on the ubiquitin  
149 associated with *Myc-UBC* (**Figure 2B**). By tracking tagged ubiquitin after a single Cas9  
150 DSB, we found that the time course of *RPS27A* and *RPL40* ubiquitin depletion mirrored  
151 that of the *RPS27A* and *RPL40* proteins, including recovery of the proteins several days  
152 after a DSB (**Figure 2C**, **Figure S2B**). Nucleofection of a targeted but catalytically  
153 inactive dCas9 RNP had no effect on the levels of the ubiquitins derived from *RPL40* or  
154 *RPS27A* (**Figure S2B**), confirming that the formation of a DSB was critical for loss of  
155 *RPS27A* and *RPL40*. Other forms of DNA damage such as MMS or UV radiation did not  
156 change the levels of ubiquitins associated with *RPL40* or *RPS27A* (**Figure S2C**). This  
157 mirrors the specificity to a double stranded DNA break we observed for the ribosomal  
158 proteins (**Figure 1D**), suggesting that the translation products of *RPL40* and *RPS27A*  
159 are repressed in tandem after dsDNA damage. Notably, DSBs had no gross effect on  
160 the total ubiquitin pool (**Figure 2E-F**), suggesting that cells are not modulating overall  
161 ubiquitin abundance.

## 162 **RPS27A is proteasomally degraded after dsDNA breaks**

163 We next worked to identify the mechanism underlying the reduction in *RPS27A*  
164 and *RPL40* after DSBs. We determined that loss of these proteins occurred post-  
165 transcriptionally, as qRT-PCR showed that DSBs induced by either etoposide or Cas9  
166 did not affect the mRNA levels of *RPS27A* or *RPL40* (**Figure 3A-B**). In light of the key



167 role played by ubiquitin signaling in proteasomal degradation, we wondered whether  
168 proteasomal degradation could explain the loss of RPS27A or RPL40. Indeed, we found  
169 that proteasome inhibition by epoxomicin treatment rescues the loss of RPS27A after  
170 DNA damage (**Figure 3C**). By contrast, the loss of RPL40 is unaffected, indicating that  
171 RPL40 is not proteasomally degraded after etoposide treatment (**Figure 3D**).  
172 Proteasome inhibition on its own increased basal RPS27A and RPL40 levels,  
173 suggesting some amount of constitutive degradation. The levels of other ribosomal  
174 proteins, including RPL22 and RPL10A, were unchanged by etoposide or epoxomicin  
175 treatment (**Figure 3E**). DSB-induced, proteasome-dependent degradation is therefore  
176 specific for RPS27A and does not globally affect the entire ribosome.

177         Next, we wanted to test whether the proteasome-dependent loss of RPS27A  
178 reflected direct proteasomal degradation of RPS27A. We generated HEK Flp-In cell  
179 lines with single copy *Ub-RPS27A-SBP* or *RPS27A-SBP* transgenes lacking the  
180 endogenous promoter, introns, and UTR sequences. Both *RPS27A-SBP* and *Ub-*  
181 *RPS27A-SBP* generate protein products of the same molecular weight (**Figure S3A**),  
182 consistent with prior reports that the ubiquitin moiety is rapidly cleaved from RPS27A  
183 (Baker et al., 1992; Grou et al., 2015; Larsen et al., 1998). Since these transgenes are  
184 expressed in a non-native genomic context without most regulatory RNA elements, their  
185 loss after induction of a DSB further suggests post-transcriptional regulation.

186         We affinity purified RPS27A-SBP in denaturing conditions and used ubiquitin  
187 chain-specific antibodies to determine that RPS27A-SBP is basally modified with Lys48  
188 polyubiquitin chains that signal for proteasomal degradation (Newton et al., 2008).

189 Lys48 chain modification of RPS27A increases upon induction of DSBs with etoposide  
190 (**Figure S3B**). In contrast, we did not observe substantial modification of RPS27A-SBP  
191 by Lys63 or Met1 (linear) polyubiquitin chains, which generally do not target proteins to  
192 the proteasome. Taken together, our data indicate that cells lose mature RPS27A  
193 through proteasome-mediated degradation after dsDNA damage.

194 We next sought identify the DNA damage response pathway that triggers the  
195 degradation of RPS27A. Consistent with our observation that RPS27A is not regulated  
196 through transcription, we found that RPS27A degradation is independent of expression  
197 of p53; RPS27A is lost after DSBs in both p53-positive (HEK293) and p53-negative  
198 (K562) cell lines (**Figure 3F**). Using small molecule inhibitors, we found that the  
199 RPS27A response is not mediated through the activity of ATM or ATR, two of the  
200 master kinases that recognize damage at the site of the DSB and initiate a DNA  
201 damage response through a phosphorylation signaling cascade (Blackford and  
202 Jackson, 2017; Maréchal and Zou, 2013) (**Figure 3G-H**). Thus the upstream molecular  
203 signals that link DSB signaling with the depletion of RPS27A remain unclear.

204 Proteasomal degradation is initiated by ubiquitin ligases, which play a prominent  
205 role in several aspects of DNA damage signaling. MDM2 is a DNA damage regulated  
206 ubiquitin ligase that targets p53 for degradation under normal growth conditions and can  
207 also ubiquitinate RPS27A (Sun et al., 2011). However, we found that siRNA knockdown  
208 of MDM2 had no effect on the early loss of RPS27A caused by etoposide or Cas9-  
209 (**Figure S3C**). In contrast, we found that stabilizing p53 with the MDM2 inhibitor nutlin  
210 (Vassilev et al., 2004) rescued RPS27A levels at later time points after DSB formation,

211 and this rescue was p53 dependent (**Figure 3I**). Recovery of RPS27A expression  
212 occurred at the transcriptional level (**Figure 3J**), consistent with *RPS27A* being a direct  
213 transcriptional target of p53 (Nosrati et al., 2015). We also found that nutlin rescued  
214 RPL40 levels after dsDNA damage and that this recovery is transcription dependent  
215 (**Figures S3D-E**). Overall, our data indicate that *depletion* of RPL40 and RPS27A is  
216 independent of p53 pathways, but the *reset* of levels of these proteins after DNA  
217 damage can be stimulated by p53.

218 We next turned towards a candidate approach to identify the ubiquitin ligase that  
219 regulates RPS27A. We first tested ZNF598, a mono-ubiquitin ligase known to  
220 ubiquitinate small ribosome subunit proteins RPS10 and RPS20 as part of the ribosome  
221 quality control pathway (Garzia et al., 2017; Sundaramoorthy et al., 2017). Knockdown  
222 of ZNF598 stabilized RPS27A in the presence of etoposide-induced DSBs, but had no  
223 effect on levels of RPL40 or other ribosome proteins, including the known ZNF598  
224 target RPS10 (**Figure S3F**). In order to directly monitor RPS27A ubiquitination, we  
225 transiently expressed an epitope-tagged ubiquitin, immunoprecipitated this ubiquitin  
226 under denaturing conditions, and blotted for RPS27A. We observed ubiquitinated  
227 RPS27A under basal growth conditions, and its abundance increased upon proteasome  
228 inhibition and induction of DSBs with etoposide. Importantly, ZNF598 knockdown  
229 eliminated RPS27A ubiquitination, suggesting that ZNF598 is required for RPS27A  
230 ubiquitination (**Figure S3G**).

231 ZNF598 is a mono-ubiquitin ligase, but proteasomal degradation usually  
232 requires polyubiquitin Lys48 chains. As we previously found Lys48 polyubiquitin chains  
233 attached to RPS27A (**Figure S3B**), we postulated that another ubiquitin ligase extends

234 the ZNF598-added monoubiquitin. This strategy of priming-and-extending by ubiquitin  
235 ligases has been previously described for other proteasomal substrates (Pierce et al.,  
236 2009; Wu et al., 2010). Given that MDM2 is not responsible for degradation of RPS27A,  
237 we tested the involvement of  $\beta$ -TRCP, which targets CReP, a eukaryotic initiation factor  
238 eIF2 $\alpha$  phosphatase, for destruction after DNA damage (Loveless et al., 2015). We found  
239 that etoposide-induced RPS27A degradation is indeed rescued by knockdown of  $\beta$ -  
240 *TRCP* (**Figure S3H**). However, we found that depletion of ZNF598 or  $\beta$ -TRCP reduced  
241 etoposide-stimulated polyubiquitination of RPS27A to basal levels but did not eliminate  
242 ubiquitination (**Figure S3I**). Our data therefore cannot exclude regulation of RPS27A by  
243 ligases other than ZNF598 and  $\beta$ -TRCP. However, our data together with prior work on  
244 the molecular activities of ZNF598 and  $\beta$ -TRCP suggest a dual role for these ligases.  
245 We propose a ‘prime-and-extend’ model (Wu et al., 2010) in which RPS27A is first  
246 monoubiquitinated by ZNF598 and that this monoubiquitin is subsequently extended to  
247 Lys48-linked polyubiquitin chains by  $\beta$ -TRCP to signal proteasomal degradation of  
248 RPS27A.

## 249 **Double-strand DNA breaks lead to eIF2 $\alpha$ phosphorylation and reduced translation** 250 **initiation**

251         Given the loss of RPS27A and RPL40 after dsDNA damage, we asked if cells  
252 exhibit a translation phenotype in response to DSBs. Consistent with our prior data  
253 (**Figure 1F**), polysome profiles of HEK293 cells treated with etoposide showed a sharp  
254 increase in 80S monosomes and a concordant reduction in polysomes (**Figure 4A**),  
255 demonstrating that etoposide-treated cells have fewer ribosomes per transcript.

256 Etoposide-treated cells exhibited an imbalance in small (40S) and large (60S) ribosome  
257 subunits compared to DMSO-treated samples (40S:60S peak height ratio of 2:7  
258 etoposide versus 1:1 DMSO), suggesting a deficiency in 40S subunits. Because the  
259 accumulation of monosomes is a hallmark of reduced protein synthesis, we wanted to  
260 gauge how nascent chain translation changes after DSBs. We used incorporation of L-  
261 azidohomoalanine (AHA), a methionine mimic that can be labeled with alkyne-  
262 conjugated probes, to track protein synthesis (Wang et al., 2017). Induction of multiple  
263 DSBs with etoposide led to a marked reduction in translation, consistent with  
264 accumulation of 80S monosomes (**Figure 4B**; **Figures S4A**). Surprisingly, induction of  
265 a single DSB with Cas9 led to reduced translation output as well (**Figure 4B**).  
266 Polysome profiling of Cas9 nucleofected cells revealed a modest increase in 80S,  
267 decrease in 40S, and shift from heavy to light polysomes (**Figure S4B**). Thus both  
268 chemically-induced DSBs and Cas9-mediated genome editing lead to a global reduction  
269 in protein synthesis.

270 We next asked if dsDNA-damaged cells regulate translation through either of two  
271 canonical mechanisms: the phosphorylation of eukaryotic initiation factor 2 $\alpha$  (eIF2 $\alpha$ ) or  
272 the de-phosphorylation of 4E binding protein (4E-BP). Phosphorylation of eIF2 $\alpha$   
273 prevents eIF2 from recruiting the initiator methionine tRNA to the mRNA while de-  
274 phosphorylation of 4E-BP inhibits eIF4E from associating with the 5' cap of transcripts  
275 (Jackson et al., 2010; Sonenberg and Hinnebusch, 2009). We found that multiple, non-  
276 specific etoposide-induced DSBs and a single, targeted Cas9-induced DSB both cause

277 phosphorylation of eIF2 $\alpha$  (**Figure 4C**). In contrast, we observed no changes in  
278 phosphorylation of 4E-BP (**Figure 4D**).

279         Phosphorylation of eIF2 $\alpha$  translationally activates a group of transcripts  
280 collectively known as the integrated stress response (Sidrauski et al., 2013). We  
281 confirmed that etoposide increases expression of ATF4, a key integrated stress  
282 response transcription factor (**Figure S4C**). We also observed that co-administration  
283 with ISRIB, a small molecule that mitigates the downstream effects of eIF2 $\alpha$   
284 phosphorylation (Sidrauski et al., 2013), rescued the etoposide-induced accumulation of  
285 80S monosomes, depletion of polysomes, and 40S:60S imbalance (**Figure 4A**), and  
286 restored bulk protein synthesis (**Figure 4B**). Our data indicate that both drug- and Cas9-  
287 induced dsDNA breaks lead to the inhibition of translation initiation through eIF2 $\alpha$   
288 phosphorylation.

289         We previously found that the etoposide-induced loss of RPL40 is not mediated  
290 through transcription or proteasomal degradation (**Figure 3A,D**), and we therefore  
291 asked whether RPL40 is regulated at the translational level by eIF2 $\alpha$  signaling. We  
292 found that co-administration of ISRIB with etoposide completely prevented the loss of  
293 RPL40 caused by DSBs (**Figure 4E**). RPS27A levels were slightly increased by ISRIB  
294 in the presence of DSBs, but were far from completely rescued. Thus RPL40 is  
295 regulated at the translation level through a phospho-eIF2 $\alpha$  dependent mechanism.

296         We next used Cas9 targeted to different genomic locations to explore whether  
297 eIF2 $\alpha$  phosphorylation is a general response to genome editing. We tested guide RNAs

298 that target the *JAK2* intron (sgIntron, see **Figure 1C** for editing efficiency), the *AAVS1*  
299 safe harbor site (sgAAVS1, (Richardson et al., 2016)) or a blue fluorescent protein  
300 (BFP) single-copy transgene (sgBFP, (Richardson et al., 2018)). All Cas9 RNPs caused  
301 eIF2 $\alpha$  phosphorylation (**Figure 4F**). Nucleofecting Cas9 without a guide RNA (apo  
302 Cas9) had no effect on eIF2 $\alpha$  phosphorylation, nor did nucleofection of guide RNAs  
303 complexed with catalytically inactive dCas9. Genomic nicking induced by the Cas9  
304 D10A nickase (nCas9) also did not induce eIF2 $\alpha$  phosphorylation. We confirmed that  
305 Cas9-induced eIF2 $\alpha$  phosphorylation was specific to the dsDNA damage itself, as Cas9  
306 RNP complexes only induced eIF2 $\alpha$  phosphorylation when the guide RNA had a  
307 genomic target. When we nucleofected Cas9-sgBFP into parental HEK293 cells we  
308 found no evidence of eIF2 $\alpha$  phosphorylation (**Figure 4F**), but nucleofecting the same  
309 RNP into HEK293 cells harboring a *BFP* transgene led to phosphorylation of eIF2 $\alpha$ .

310 We also verified that eIF2 $\alpha$  phosphorylation is a general response that occurs  
311 after Cas9 RNP editing in a range of primary cell types. Neither T-cells, hematopoietic  
312 stem and progenitor cells (HSPCs), nor fibroblasts exhibited high levels of eIF2 $\alpha$   
313 phosphorylation when nucleofected with negative control apo Cas9 or dCas9-sgRNA  
314 (**Figure 4G**; see **Figures S4D-E** for T-cell sgRNA target validation). However,  
315 nucleofection with catalytically active Cas9 complexed with multiple different targeting  
316 guide RNAs caused increased eIF2 $\alpha$  phosphorylation in each of these primary cells.  
317 Primary cells are p53-positive, but we found that eIF2 $\alpha$  phosphorylation also occurs in  
318 K562 p53-negative cells, much like RPS27A degradation (**Figure S4F**). Hence, a single  
319 locus Cas9-induced DSB triggers eIF2 $\alpha$  phosphorylation in a wide range of cell types.

## 320 **Modulating eIF2 $\alpha$ phosphorylation alters genome editing outcomes**

321           Given that eIF2 $\alpha$  phosphorylation is induced by DSBs, we wondered whether  
322 downstream eIF2 $\alpha$  signaling influenced genome editing outcomes. We altered the  
323 eIF2 $\alpha$  response using two small molecule drugs: ISRIB to bypass eIF2 $\alpha$  signaling and  
324 salubrinal to increase eIF2 $\alpha$  phosphorylation (**Figure S5A**, (Boyce et al., 2005)). We  
325 performed editing experiments with HEK293 or K562 cells treated with ISRIB or  
326 salubrinal, targeting a single-copy BFP transgene in each cell line to introduce  
327 insertions and deletions (indels) via error-prone DNA repair. We monitored genome  
328 editing using both T7 endonuclease I (T7E1) heteroduplex assays and next-generation  
329 sequencing of PCR amplicons of the edited transgene.

330           Strikingly, increasing phospho-eIF2 $\alpha$  signaling with salubrinal decreased the  
331 frequency of indels during Cas9-sgBFP editing. Bypassing phospho-eIF2 $\alpha$  signaling  
332 with ISRIB, on the other hand, resulted in an increased fraction of indels (**Figure 5A-B**).  
333 Increasing eIF2 $\alpha$  phosphorylation with salubrinal while simultaneously bypassing this  
334 phosphorylation with ISRIB overcame the salubrinal-induced decrease in editing  
335 (**Figure 5A-B**). Perturbing eIF2 $\alpha$  signaling affected editing levels in both p53-positive  
336 (HEK) and p53-negative cells (K562) (**Figure 5A, S5B**). From next-generation  
337 sequencing of edited alleles, we found that modulating eIF2 $\alpha$  phosphorylation changed  
338 the relative frequency of edited alleles rather than introducing new types of indels  
339 (**Figure 5C, Figure S5C, Table S1**). These data indicate that DSB-induced eIF2 $\alpha$   
340 signaling affects DNA repair to reduce the error-prone formation of indels.



341 **Genome editing initiates a translational response that precedes long-term**  
342 **transcriptional changes**

343 We wanted to measure how the ribosome remodeling and eIF2 $\alpha$  phosphorylation  
344 induced by Cas9-mediated genome editing globally affect translation. We carried out  
345 ribosome profiling and matched mRNA sequencing in HEK293 cells with a single DSB  
346 induced by Cas9-sgIntron, with catalytically inactive dCas9-sgIntron serving as our  
347 background control (**Figure 6A**). *JAK2* mRNA and ribosome footprint levels did not  
348 show any significant differences at either 36 or 72 hours (**Table S2**), confirming our  
349 qPCR data (**Figure S1A**), which indicated that sgIntron-targeted editing does not  
350 perturb expression of *JAK2*. Global profiling of translation and transcription revealed  
351 that cells with a single Cas9-DSB activate an early translational program that is  
352 replaced by a longer-term transcriptional response. At 36 hours after nucleofection, we  
353 found 132 genes that exhibit changes in ribosome footprint abundance while no genes  
354 changed in transcript abundance (Wald test, FDR corrected  $p$ -value < 0.1, **Figures 6B-**  
355 **C, Table S2**). By 72 hours, there were changes in mRNA transcript levels but no  
356 statistically significant changes in footprint abundance (**Figures 6B&D, Table S2**).  
357 Translational efficiency, the ratio of ribosome footprints to mRNA transcripts, also  
358 reflected these differences, with changes in translational efficiency at 36 hours driven by  
359 translation and changes at 72 hours driven by mRNA abundance (**Figure S6A**).

360 Because we found that even a single DSB induces eIF2 $\alpha$  phosphorylation, we  
361 asked whether genes known to be translationally regulated during the phospho-eIF2 $\alpha$ -  
362 induced integrated stress response (ISR) also experience changes in translation after a

363 Cas9-induced DSB. At both 36 and 72 hours after Cas9 nucleofection, we found that  
364 ISR targets (**Table S3**) collectively had higher translation ( $p < 0.05$ , Mann-Whitney-  
365 Wilcoxon test, **Figure 6E, 6G**), although individual genes did not rise to the level of  
366 significance. This effect was much larger at 36 hours than at 72 hours. Genome editing  
367 with Cas9 therefore leads to the induction of the integrated stress response at the  
368 translation level. These results provide a global view of cells activating translational and  
369 transcriptional responses that persist days after Cas9 is gone from the cell and genome  
370 editing is complete (**Figure 1B-C**).

371         Given that we observed changes in *RPS27A* and *RPL40* levels after Cas9  
372 editing, we asked how the global translation of ribosomal protein genes changes after a  
373 Cas9-mediated DSB. We found decreased footprints and mRNA abundance for several  
374 ribosomal protein transcripts 36 hours after Cas9 editing ( $p < 0.05$ , **Figure 6E-F**). eIF2 $\alpha$   
375 phosphorylation can lead to modest decreases in ribosome protein translation  
376 (Sidrauski et al., 2015), and our data links this eIF2 $\alpha$  signaling to the DSB response.  
377 Ribosome protein transcript levels increased 72 hours after a Cas9-mediated DSB,  
378 suggesting that the cell resets ribosome protein levels through increased transcription  
379 (**Figures 6G-H**). Given our previous data that the reset of *RPS27A* and *RPL40*  
380 transcripts after DSBs is p53-dependent (**Figure 3I, S3D**), it is tempting to speculate  
381 that the global transcriptional increase in ribosomal transcription is the result of p53  
382 signaling.

383         In the Cas9 ribosome profiling datasets, we found that DSB repair genes are  
384 somewhat regulated at the translation level. DSB repair genes showed no significant

385 change in translation at 36 hours (**Figures 6E, S6B**) but showed a small decrease in  
386 translation efficiency at 72 hours that was driven by transcript abundance (**Figures**  
387 **S6B**). This decrease in translation may signify that the cell tunes down the production of  
388 these proteins as the cell returns to homeostasis. Our data, however, do not exclude  
389 early translational control of DSB repair genes that is completed before 36 hours.  
390 In sum, our ribosome profiling and RNA-seq data from Cas9-treated cells demonstrate  
391 that even a single DSB can induce small, yet significant changes to the translome and  
392 transcriptome that persist days after the lesion is formed and repaired. Overall, our data  
393 suggest that Cas9 editing leads to changes in signaling, translation, and gene  
394 expression that are not only independent of editing a target gene but also inherent to  
395 the cellular response to double stranded DNA damage.

## 396 **Discussion**

397 DNA damage poses a serious threat to organisms. Consequently, cells have an  
398 array of damage response pathways dedicated to maintaining genome integrity. These  
399 responses include cell cycle arrest after moderate levels of damage and apoptosis  
400 when the insult becomes too great. One hallmark of the DNA damage response is  
401 transcriptional reprogramming, such as the p53 response. Here, we report another,  
402 translational layer of DSB response. Even a single DSB caused by Cas9 genome  
403 editing can induce potent, p53-independent ribosome remodeling and translational  
404 reprogramming that occurs prior to transcriptional changes.

405

### 406 ***Translational shutdown after DNA damage promotes error-free repair***

407 We found that DSBs introduced during genome editing lead to translational  
408 reprogramming in immortalized and primary human cell types. Bulk protein synthesis is  
409 reduced after DSBs in part because translation is inhibited by eIF2 $\alpha$  phosphorylation.  
410 Other types of DNA damage can induce eIF2 $\alpha$  phosphorylation (Deng et al., 2002; von  
411 Holzen et al., 2007; Jiang and Wek, 2005; Kim et al., 2014; Peidis et al., 2011; Robert et  
412 al., 2009; Wu et al., 2002), and we found that multiple DSBs or even a single DSB leads  
413 to eIF2 $\alpha$  phosphorylation. However, single-strand genomic lesions do not induce this  
414 signal (Cas9 vs. nickase Cas9, **Figure 4D**). Ionizing radiation can cause mTOR-  
415 mediated dephosphorylation of 4E-BP (Braunstein et al., 2009; Kumar et al., 2000;  
416 Schneider et al., 2005), but we found no evidence that cells with chemically- or Cas9-  
417 induced DSBs reduce translation through 4E-BP dephosphorylation (**Figure 4C**). This

418 difference may reflect other cellular responses to the collateral damage caused by  
419 ionizing radiation to non-DSB DNA lesions or to other macromolecules including RNA  
420 and protein. We have found that the DSB translational response does not require  
421 canonical DNA damage factors such as p53. Reset of ribosomal protein levels after  
422 DSBs can be stimulated by p53-mediated transcription (**Figure 3J, S3E**), but the  
423 upstream signaling pathways linking DNA damage to eIF2 $\alpha$  phosphorylation remain  
424 unclear.

425         We found that eIF2 $\alpha$  phosphorylation may help cells avoid permanent genomic  
426 changes after double stranded DNA damage. Notably, bypassing eIF2 $\alpha$  phosphorylation  
427 increases error-prone repair at a Cas9 DSB, while increasing eIF2 $\alpha$  phosphorylation  
428 decreases indel formation. Cells have a powerful incentive to avoid error-prone repair,  
429 and it has been suggested that nonhomologous end joining (NHEJ) is inherently a  
430 fidelitous process (Boulton and Jackson, 1996; Honma et al., 2007; Lin et al., 2013;  
431 Rath et al., 2014). In this model, the indels caused by genome editing are products of  
432 non-fidelitous alternative end joining (alt-EJ) pathways such as microhomology  
433 mediated end joining (MMEJ) or processing of the DNA ends prior to repair (Bae et al.,  
434 2014; Bétermier et al., 2014; Guirouilh-Barbat et al., 2007; Nakade et al., 2014). It is  
435 tempting to speculate that DSB-induced eIF2 $\alpha$  phosphorylation could promote error-free  
436 DNA repair as a means to maintain genome fidelity. However, the downstream players  
437 that alter the repair profile of a genomic locus after eIF2 $\alpha$  phosphorylation remain to be  
438 identified.

439

440 ***Translational changes bridge the immediate, post-translational DNA damage***  
441 ***response to the long-term transcriptional response***

442 Double stranded DNA breaks elicit an immediate post-translational response that  
443 enacts immediate processing of the break. This response includes phosphorylation of  
444 proteins such as ATM and H2AX and ubiquitination of proteins such as p53 and  
445 histones. DSBs also induce a potent p53-mediated transcriptional response, leading to  
446 reprogramming that prioritizes DNA damage response. We have found that DSBs  
447 induce a short-term translational response mediated by eIF2 $\alpha$  phosphorylation.

448 We hypothesize that the translational response to DNA damage enables cells to  
449 bridge the immediate post-translational response with longer-term transcriptional  
450 reprogramming. Cells increase the translation of integrated stress response genes 36  
451 hours after Cas9 RNP nucleofection, suggesting that cells activate a translational  
452 program to cope with DNA damage prior to transcriptional changes. We find that this  
453 translational program is shut off by 72 hours, with changes in mRNA levels dominating  
454 gene expression.

455 We observed that RPS27A and RPL40 could be stimulated by p53-mediated  
456 transcription after DSBs (**Figures 3J,S3E**), consistent with reports that *RPS27A* can be  
457 a transcriptional target of p53 (Nosrati et al., 2015). RPS27A was previously described  
458 as binding and inhibiting the E3 ligase MDM2 (Sun et al., 2011), thereby promoting p53  
459 expression in the cell. The role of RPS27A in preventing p53 degradation coupled with  
460 p53 activation of *RPS27A* transcription suggests an RPS27A-p53 positive feedback

461 loop. Consequently, the degradation of RPS27A may serve to keep this loop inactive or  
462 shut it off after repair.

463

#### 464 ***Ribosomes lack core ribosome proteins after dsDNA damage***

465 Non-DSB DNA damage caused by sources such as UV irradiation and cisplatin  
466 leads to the inhibition of Pol I transcription (Ciccia et al., 2014; Kruhlak et al., 2007;  
467 Larsen et al., 2014), preventing rRNA expression and impacting ribosome biogenesis.  
468 Interestingly, Cas9 or I-Ppol-induced DSBs in rDNA triggers this inhibition (van Sluis  
469 and McStay, 2015). Our study has revealed that DSBs lead to translation phenotypes  
470 beyond impaired ribosome biogenesis regardless of their location in the genome. Our  
471 observation that ribosomes lack RPL40 and RPS27A after dsDNA damage is one of the  
472 few known instances where ribosome composition is deliberately modulated in  
473 response to a specific biological stimulus (Shi and Barna, 2015; Xue and Barna, 2012).  
474 While differential expression of ribosomal proteins between tissue types and  
475 subpopulations of ribosomes within a cell are emerging themes in ribosome biology,  
476 there have been few cases of altered ribosome composition in response to the cellular  
477 environment.

478 While loss of RPS27A and RPL40 may alter ribosome function in a way that is  
479 difficult to detect in our ribosome profiling analysis, we cannot rule out that ribosomes  
480 lacking RPS27A and RPL40 have different functions. Indeed, ribosomes lacking RPL40  
481 are capable of translation in certain contexts. RPL40 is necessary for vesicular  
482 stomatitis virus (VSV) translation but not cap-dependent translation in HeLa cells (Lee

483 et al., 2012). In fact, complete deletion of the paralogous *RPL40A* and *RPL40B* genes in  
484 yeast was not lethal, and affected translation of only ~7% of the genome. RPL40  
485 depletion – and perhaps RPS27A depletion as well – may thus act in a regulatory  
486 fashion. It is also possible that changes in ribosome composition after DNA damage  
487 may serve at least in part to regulate the extra-translational functions of RPS27A,  
488 RPL40, or their associated ubiquitins.

489

### 490 ***Gene editing induces cellular phenotypes***

491       There is growing appreciation that Cas9 genome editing can cause cellular  
492 effects that mirror those observed with multiple, non-specific DSBs. The degree of  
493 damage may be far less, but the principle is the same. For example, embryonic stem  
494 cells are hyper-sensitive to HDR from even a single DSB introduced by Cas9, which can  
495 induce a p53 response that compromises cell health (Haapaniemi et al., 2018; Ihry et  
496 al., 2018). CRISPR-Cas9 nuclease screening data has also shown that targeting high  
497 copy number or repetitive regions of a genome reduces cell fitness, consistent with a  
498 titratable cell cycle arrest that could be caused by p53 signaling (Aguirre et al., 2016;  
499 Munoz et al., 2016; Wang et al., 2015).

500       We have found that even a single non-coding Cas9-induced DSB elicits  
501 ribosome remodeling and translational shutdown. Much of the concern about the safety  
502 and efficacy of genome editing had focused on off-target mutagenesis. Our findings  
503 highlight how the endogenous DNA damage response can have a days-long impact on  
504 the translome and transcriptome independent of the gene target. These cellular



505 responses should be taken into account when it is impossible to isolate and expand a  
506 clonal cell line for long periods of time after genome editing, for example during  
507 therapeutic genome editing of primary cells.

## 508 **Acknowledgements**

509 We thank Gloria Brar and Jamie Cate for their helpful discussions, and we also  
510 thank the Rape Lab at UC Berkeley for providing us with the pHA-Ub plasmid and the  
511 Cate Lab for supplying us with the thermophilic yeast strain, *Kluyveromyces marxianus*.  
512 We would like to acknowledge the QB3 MacroLab at UC Berkeley for purifying Cas9  
513 proteins and the *Kluyveromyces marxianus* deadenylase; the UC Berkeley DNA  
514 Sequencing Facility for Sanger sequencing analysis; and the Vincent J. Coates  
515 Genomics Sequencing Laboratory for performing our NGS sequencing.

516

## 517 **Funding Sources**

518 This work was supported by National Institute Health New Innovator Awards  
519 (DP2 HL141006, JEC, and DP2 CA195768, NTI), the Li Ka Shing Foundation (JEC), the  
520 Heritage Medical Research Institute (JEC), the National Institute of Health (DP3  
521 DK111914 and P50 GM08225, AM), the Keck Foundation (AM), gifts from Jake Aronov  
522 and Galen Hoskin (AM), and a National Multiple Sclerosis Society grant (CA 1074-A-21,  
523 AM). CR was supported by fellowships awarded through the The Shurl and Kay Curci  
524 Foundation and the National Science Foundation Graduate Research Fellowship  
525 Program (DGE 1106400 and DGE 1752814); DNN was supported by the UCSF  
526 Infectious Disease Training Program (2T32AI007641-16) and the CIS-CSL Behring  
527 Fellowship; PAF by the National Institute Health T32 Training Grant (4T32GM007232-  
528 40); and JTV by the California Institute for Regenerative Medicine (TRAN1-09292). AM  
529 receives funding from the Innovative Genomics Institute (IGI), holds a Career Award for  
530 Medical Scientists from the Burroughs Wellcome Fund, and is a Chan Zuckerberg

531 Biohub Investigator. This work used the Vincent J. Coates Genomics Sequencing  
532 Laboratory at UC Berkeley, supported by the NIH S10 OD018174 Instrumentation  
533 Grant.

534

### 535 **Author Contributions**

536 Conceptualization, JEC, NTI, EZ, and CR; Methodology, JEC, NTI, EZ, CR,  
537 SKW, AM, DNN, and JRL; Formal Analysis, NTI, SKW, CR, and EZ; Investigation, EZ,  
538 CR, DNN, PAF, JRL, ZAM, and JTV; Writing - Original Draft, CR and JEC; Writing -  
539 Review & Editing, CR, JEC, NTI, EZ, DNN, AM, and PAF; Visualization, CR, EZ, SKW,  
540 NTI, and DNN; Supervision, JEC, NTI, AM, and CR; Funding Acquisition, JEC, NTI, CR,  
541 AM, and DNN.

542

### 543 **Conflicts of Interest**

544 AM and JEC are co-founders of Spotlight Therapeutics. AM serves as a scientific  
545 advisory board member to PACT Pharma and was previously an advisor to Juno  
546 Therapeutics. The Marson laboratory has received a gift from Gilead and sponsored  
547 research support from Juno Therapeutics, Epinomics, and Sanofi.

## 548 References

- 549 Aguirre, A.J., Meyers, R.M., Weir, B.A., Vazquez, F., Zhang, C.-Z., Ben-David, U., Cook, A., Ha,  
550 G., Harrington, W.F., Doshi, M.B., et al. (2016). Genomic Copy Number Dictates a Gene-  
551 Independent Cell Response to CRISPR/Cas9 Targeting. *Cancer Discov.* 6, 914–929.
- 552 Andreev, D.E., O'Connor, P.B.F., Fahey, C., Kenny, E.M., Terenin, I.M., Dmitriev, S.E.,  
553 Cormican, P., Morris, D.W., Shatsky, I.N., and Baranov, P.V. (2015). Translation of 5' leaders is  
554 pervasive in genes resistant to eIF2 repression. *Elife* 4.
- 555 Bae, S., Kweon, J., Kim, H.S., and Kim, J.-S. (2014). Microhomology-based choice of Cas9  
556 nuclease target sites. *Nat. Methods* 11, 705–706.
- 557 Baker, R.T., Tobias, J.W., and Varshavsky, A. (1992). Ubiquitin-specific proteases of  
558 *Saccharomyces cerevisiae*. Cloning of UBP2 and UBP3, and functional analysis of the UBP  
559 gene family. *J. Biol. Chem.* 267, 23364–23375.
- 560 Ben-Shem, A., Jenner, L., Yusupova, G., and Yusupov, M. (2010). Crystal Structure of the  
561 Eukaryotic Ribosome. *Science* 330, 1203–1209.
- 562 Bétermier, M., Bertrand, P., and Lopez, B.S. (2014). Is Non-Homologous End-Joining Really an  
563 Inherently Error-Prone Process? *PLoS Genet.* 10, e1004086.
- 564 Blackford, A.N., and Jackson, S.P. (2017). ATM, ATR, and DNA-PK: The Trinity at the Heart of  
565 the DNA Damage Response. *Mol. Cell* 66, 801–817.
- 566 Boulton, S.J., and Jackson, S.P. (1996). *Saccharomyces cerevisiae* Ku70 potentiates  
567 illegitimate DNA double-strand break repair and serves as a barrier to error-prone DNA repair  
568 pathways. *EMBO J.* 15, 5093–5103.
- 569 Boyce, M., Bryant, K.F., Jousse, C., Long, K., Harding, H.P., Scheuner, D., Kaufman, R.J., Ma,  
570 D., Coen, D.M., Ron, D., et al. (2005). A selective inhibitor of eIF2alpha dephosphorylation  
571 protects cells from ER stress. *Science* 307, 935–939.
- 572 Braunstein, S., Badura, M.L., Xi, Q., Formenti, S.C., and Schneider, R.J. (2009). Regulation of  
573 Protein Synthesis by Ionizing Radiation. *Mol. Cell. Biol.* 29, 5645–5656.
- 574 Chae, Y.K., Anker, J.F., Carneiro, B.A., Chandra, S., Kaplan, J., Kalyan, A., Santa-Maria, C.A.,  
575 Plataniias, L.C., and Giles, F.J. (2016). Genomic landscape of DNA repair genes in cancer.  
576 *Oncotarget* 7, 23312–23321.
- 577 Ciccia, A., Huang, J.-W., Izhar, L., Sowa, M.E., Harper, J.W., and Elledge, S.J. (2014). Treacher  
578 Collins syndrome TCOF1 protein cooperates with NBS1 in the DNA damage response. *Proc.*  
579 *Natl. Acad. Sci. U. S. A.* 111, 18631–18636.
- 580 Deng, J., Harding, H.P., Raught, B., Gingras, A.-C., Berlanga, J.J., Scheuner, D., Kaufman,  
581 R.J., Ron, D., and Sonenberg, N. (2002). Activation of GCN2 in UV-irradiated cells inhibits  
582 translation. *Curr. Biol.* 12, 1279–1286.
- 583 DeWitt, M.A., Magis, W., Bray, N.L., Wang, T., Berman, J.R., Urbinati, F., Heo, S.-J., Mitros, T.,  
584 Muñoz, D.P., Boffelli, D., et al. (2016). Selection-free genome editing of the sickle mutation in

- 585 human adult hematopoietic stem/progenitor cells. *Sci. Transl. Med.* **8**, 360ra134.
- 586 Garzia, A., Jafarnejad, S.M., Meyer, C., Chapat, C., Gogakos, T., Morozov, P., Amiri, M.,  
587 Shapiro, M., Molina, H., Tuschl, T., et al. (2017). The E3 ubiquitin ligase and RNA-binding  
588 protein ZNF598 orchestrates ribosome quality control of premature polyadenylated mRNAs.  
589 *Nat. Commun.* **8**, 16056.
- 590 Grou, C.P., Pinto, M.P., Mendes, A.V., Domingues, P., and Azevedo, J.E. (2015). The de novo  
591 synthesis of ubiquitin: identification of deubiquitinases acting on ubiquitin precursors. *Sci. Rep.*  
592 **5**.
- 593 Guirouilh-Barbat, J., Rass, E., Plo, I., Bertrand, P., and Lopez, B.S. (2007). Defects in XRCC4  
594 and KU80 differentially affect the joining of distal nonhomologous ends. *Proc. Natl. Acad. Sci. U.*  
595 *S. A.* **104**, 20902–20907.
- 596 Haapaniemi, E., Botla, S., Persson, J., Schmierer, B., and Taipale, J. (2018). CRISPR–Cas9  
597 genome editing induces a p53-mediated DNA damage response. *Nat. Med.* **24**, 927–930.
- 598 von Holzen, U., Pataer, A., Raju, U., Bocangel, D., Vorburger, S.A., Liu, Y., Lu, X., Roth, J.A.,  
599 Aggarwal, B.B., Barber, G.N., et al. (2007). The double-stranded RNA-activated protein kinase  
600 mediates radiation resistance in mouse embryo fibroblasts through nuclear factor kappaB and  
601 Akt activation. *Clin. Cancer Res.* **13**, 6032–6039.
- 602 Honma, M., Sakuraba, M., Koizumi, T., Takashima, Y., Sakamoto, H., and Hayashi, M. (2007).  
603 Non-homologous end-joining for repairing I-SceI-induced DNA double strand breaks in human  
604 cells. *DNA Repair* **6**, 781–788.
- 605 Hsu, P.D., Scott, D.A., Weinstein, J.A., Ran, F.A., Konermann, S., Agarwala, V., Li, Y., Fine,  
606 E.J., Wu, X., Shalem, O., et al. (2013). DNA targeting specificity of RNA-guided Cas9  
607 nucleases. *Nat. Biotechnol.* **31**, 827–832.
- 608 Hultquist, J.F., Schumann, K., Woo, J.M., Manganaro, L., McGregor, M.J., Doudna, J., Simon,  
609 V., Krogan, N.J., and Marson, A. (2016). A Cas9 Ribonucleoprotein Platform for Functional  
610 Genetic Studies of HIV-Host Interactions in Primary Human T Cells. *Cell Rep.* **17**, 1438–1452.
- 611 Ihry, R.J., Worringer, K.A., Salick, M.R., Frias, E., Ho, D., Theriault, K., Kommineni, S., Chen, J.,  
612 Sondey, M., Ye, C., et al. (2018). p53 inhibits CRISPR-Cas9 engineering in human pluripotent  
613 stem cells. *Nat. Med.* **24**, 939–946.
- 614 Ingolia, N.T., Brar, G.A., Rouskin, S., McGeachy, A.M., and Weissman, J.S. (2012). The  
615 ribosome profiling strategy for monitoring translation in vivo by deep sequencing of ribosome-  
616 protected mRNA fragments. *Nat. Protoc.* **7**, 1534–1550.
- 617 Ingolia, N.T., Brar, G.A., Stern-Ginossar, N., Harris, M.S., Talhouarne, G.J.S., Jackson, S.E.,  
618 Wills, M.R., and Weissman, J.S. (2014). Ribosome profiling reveals pervasive translation  
619 outside of annotated protein-coding genes. *Cell Rep.* **8**, 1365–1379.
- 620 Jackson, R.J., Hellen, C.U.T., and Pestova, T.V. (2010). The mechanism of eukaryotic  
621 translation initiation and principles of its regulation. *Nat. Rev. Mol. Cell Biol.* **11**, 113–127.
- 622 Jiang, H.-Y., and Wek, R.C. (2005). GCN2 phosphorylation of eIF2alpha activates NF-kappaB  
623 in response to UV irradiation. *Biochem. J* **385**, 371–380.

- 624 Joerger, A.C., and Fersht, A.R. (2016). The p53 Pathway: Origins, Inactivation in Cancer, and  
625 Emerging Therapeutic Approaches. *Annu. Rev. Biochem.* *85*, 375–404.
- 626 Kim, D., Langmead, B., and Salzberg, S.L. (2015). HISAT: a fast spliced aligner with low  
627 memory requirements. *Nat. Methods* *12*, 357–360.
- 628 Kim, E.J., Lee, Y.-J., Kang, S., and Lim, Y.-B. (2014). Ionizing radiation activates  
629 PERK/eIF2 $\alpha$ /ATF4 signaling via ER stress-independent pathway in human vascular endothelial  
630 cells. *Int. J. Radiat. Biol.* *90*, 306–312.
- 631 Kim, S., Koo, T., Jee, H.-G., Cho, H.-Y., Lee, G., Lim, D.-G., Shin, H.S., and Kim, J.-S. (2018).  
632 CRISPR RNAs trigger innate immune responses in human cells. *Genome Res.*
- 633 Kruhlak, M., Crouch, E.E., Orlov, M., Montañño, C., Gorski, S.A., Nussenzweig, A., Misteli, T.,  
634 Phair, R.D., and Casellas, R. (2007). The ATM repair pathway inhibits RNA polymerase I  
635 transcription in response to chromosome breaks. *Nature* *447*, 730–734.
- 636 Kumar, V., Sabatini, D., Pandey, P., Gingras, A.C., Majumder, P.K., Kumar, M., Yuan, Z.M.,  
637 Carmichael, G., Weichselbaum, R., Sonenberg, N., et al. (2000). Regulation of the rapamycin  
638 and FKBP-target 1/mammalian target of rapamycin and cap-dependent initiation of translation  
639 by the c-Abl protein-tyrosine kinase. *J. Biol. Chem.* *275*, 10779–10787.
- 640 Larsen, C.N., Krantz, B.A., and Wilkinson, K.D. (1998). Substrate Specificity of Deubiquitinating  
641 Enzymes: Ubiquitin C-Terminal Hydrolases†. *Biochemistry* *37*, 3358–3368.
- 642 Larsen, D.H., Hari, F., Clapperton, J.A., Gwerder, M., Gutsche, K., Altmeyer, M., Jungmichel,  
643 S., Toledo, L.I., Fink, D., Rask, M.-B., et al. (2014). The NBS1-Treacle complex controls  
644 ribosomal RNA transcription in response to DNA damage. *Nat. Cell Biol.* *16*, 792–803.
- 645 Lee, A.S.-Y., -Y. Lee, A.S., Burdeinick-Kerr, R., and Whelan, S.P.J. (2012). A ribosome-  
646 specialized translation initiation pathway is required for cap-dependent translation of vesicular  
647 stomatitis virus mRNAs. *Proceedings of the National Academy of Sciences* *110*, 324–329.
- 648 Li, H., Handsaker, B., Wysoker, A., Fennell, T., Ruan, J., Homer, N., Marth, G., Abecasis, G.,  
649 Durbin, R., and 1000 Genome Project Data Processing Subgroup (2009). The Sequence  
650 Alignment/Map format and SAMtools. *Bioinformatics* *25*, 2078–2079.
- 651 Li, W., Cowley, A., Uludag, M., Gur, T., McWilliam, H., Squizzato, S., Park, Y.M., Buso, N., and  
652 Lopez, R. (2015). The EMBL-EBI bioinformatics web and programmatic tools framework.  
653 *Nucleic Acids Res.* *43*, W580–W584.
- 654 Lin, W.Y., Wilson, J.H., and Lin, Y. (2013). Repair of chromosomal double-strand breaks by  
655 precise ligation in human cells. *DNA Repair* *12*, 480–487.
- 656 Lingeman, E., Jeans, C., and Corn, J.E. (2017). Production of Purified CasRNPs for Efficacious  
657 Genome Editing. *Curr. Protoc. Mol. Biol.* *120*, 31.10.1–31.10.19.
- 658 Love, M.I., Huber, W., and Anders, S. (2014). Moderated estimation of fold change and  
659 dispersion for RNA-seq data with DESeq2. *Genome Biol.* *15*, 550.
- 660 Loveless, T.B., Topacio, B.R., Vashisht, A.A., Galaang, S., Ulrich, K.M., Young, B.D.,  
661 Wohlschlegel, J.A., and Toczyski, D.P. (2015). DNA Damage Regulates Translation through  $\beta$ -  
662 TRCP Targeting of CReP. *PLoS Genet.* *11*, e1005292.

- 663 Mali, P., Yang, L., Esvelt, K.M., Aach, J., Guell, M., DiCarlo, J.E., Norville, J.E., and Church,  
664 G.M. (2013). RNA-guided human genome engineering via Cas9. *Science* 339, 823–826.
- 665 Maréchal, A., and Zou, L. (2013). DNA damage sensing by the ATM and ATR kinases. *Cold*  
666 *Spring Harb. Perspect. Biol.* 5.
- 667 McGlincy, N.J., and Ingolia, N.T. (2017). Transcriptome-wide measurement of translation by  
668 ribosome profiling. *Methods* 126, 112–129.
- 669 Munoz, D.M., Cassiani, P.J., Li, L., Billy, E., Korn, J.M., Jones, M.D., Golji, J., Ruddy, D.A., Yu,  
670 K., McAllister, G., et al. (2016). CRISPR Screens Provide a Comprehensive Assessment of  
671 Cancer Vulnerabilities but Generate False-Positive Hits for Highly Amplified Genomic Regions.  
672 *Cancer Discov.* 6, 900–913.
- 673 Nakade, S., Tsubota, T., Sakane, Y., Kume, S., Sakamoto, N., Obara, M., Daimon, T., Sezutsu,  
674 H., Yamamoto, T., Sakuma, T., et al. (2014). Microhomology-mediated end-joining-dependent  
675 integration of donor DNA in cells and animals using TALENs and CRISPR/Cas9. *Nat. Commun.*  
676 5, 5560.
- 677 Newton, K., Matsumoto, M.L., Wertz, I.E., Kirkpatrick, D.S., Lill, J.R., Tan, J., Dugger, D.,  
678 Gordon, N., Sidhu, S.S., Fellouse, F.A., et al. (2008). Ubiquitin chain editing revealed by  
679 polyubiquitin linkage-specific antibodies. *Cell* 134, 668–678.
- 680 Norrander, J., Kempe, T., and Messing, J. (1983). Construction of improved M13 vectors using  
681 oligodeoxynucleotide-directed mutagenesis. *Gene* 26, 101–106.
- 682 Nosrati, N., Kapoor, N.R., and Kumar, V. (2015). DNA damage stress induces the expression of  
683 ribosomal protein S27a gene in a p53-dependent manner. *Gene* 559, 44–51.
- 684 Peidis, P., Papadakis, A.I., Muaddi, H., Richard, S., and Koromilas, A.E. (2011). Doxorubicin  
685 bypasses the cytoprotective effects of eIF2 $\alpha$  phosphorylation and promotes PKR-mediated cell  
686 death. *Cell Death Differ.* 18, 145–154.
- 687 Pierce, N.W., Kleiger, G., Shan, S.-O., and Deshaies, R.J. (2009). Detection of Sequential  
688 Polyubiquitylation on a Millisecond Time-Scale. *Nature* 462, 615.
- 689 Pinello, L., Canver, M.C., Hoban, M.D., Orkin, S.H., Kohn, D.B., Bauer, D.E., and Yuan, G.-C.  
690 (2016). Analyzing CRISPR genome-editing experiments with CRISPResso. *Nat. Biotechnol.* 34,  
691 695–697.
- 692 Rabl, J., Leibundgut, M., Ataide, S.F., Haag, A., and Ban, N. (2011). Crystal Structure of the  
693 Eukaryotic 40S Ribosomal Subunit in Complex with Initiation Factor 1. *Science* 331, 730–736.
- 694 Rath, A., Hromas, R., and De Benedetti, A. (2014). Fidelity of end joining in mammalian  
695 episomes and the impact of Metnase on joint processing. *BMC Mol. Biol.* 15, 6.
- 696 Richardson, C.D., Ray, G.J., DeWitt, M.A., Curie, G.L., and Corn, J.E. (2016). Enhancing  
697 homology-directed genome editing by catalytically active and inactive CRISPR-Cas9 using  
698 asymmetric donor DNA. *Nat. Biotechnol.* 34, 339–344.
- 699  
700 Richardson, C.D., Kazane, K.R., Feng, S.J., Zelin, E., Bray, N.L., Schäfer, A.J., Floor, S.N., and  
701 Corn, J.E. (2018). CRISPR–Cas9 genome editing in human cells occurs via the Fanconi anemia

- 702 pathway. *Nat. Genet.* *50*, 1132–1139.
- 703 Robert, F., Williams, C., Yan, Y., Donohue, E., Cencic, R., Burley, S.K., and Pelletier, J. (2009).  
704 Blocking UV-induced eIF2 $\alpha$  phosphorylation with small molecule inhibitors of GCN2. *Chem.*  
705 *Biol. Drug Des.* *74*, 57–67.
- 706 Schindelin, J., Rueden, C.T., Hiner, M.C., and Eliceiri, K.W. (2015). The ImageJ ecosystem: An  
707 open platform for biomedical image analysis. *Mol. Reprod. Dev.* *82*, 518–529.
- 708 Schneider, R., Braunstein, S., Xi, Q., and Formenti, S. (2005). Ionizing Radiation Controls  
709 Protein Synthesis Through a Novel Akt-independent Pathway Involving Regulation of mTOR  
710 and 4E-BP1 Stability. *International Journal of Radiation Oncology\*Biophysics* *63*, S146.
- 711 Shi, Z., and Barna, M. (2015). Translating the genome in time and space: specialized  
712 ribosomes, RNA regulons, and RNA-binding proteins. *Annu. Rev. Cell Dev. Biol.* *31*, 31–54.
- 713 Sidrauski, C., Acosta-Alvear, D., Khoutorsky, A., Vedantham, P., Hearn, B.R., Li, H., Gamache,  
714 K., Gallagher, C.M., Ang, K.K.-H., Wilson, C., et al. (2013). Pharmacological brake-release of  
715 mRNA translation enhances cognitive memory. *Elife* *2*, e00498.
- 716 Sidrauski, C., McGeachy, A.M., Ingolia, N.T., and Walter, P. (2015). The small molecule ISRIB  
717 reverses the effects of eIF2 $\alpha$  phosphorylation on translation and stress granule assembly. *Elife*  
718 *4*.
- 719 van Sluis, M., and McStay, B. (2015). A localized nucleolar DNA damage response facilitates  
720 recruitment of the homology-directed repair machinery independent of cell cycle stage. *Genes*  
721 *Dev.* *29*, 1151–1163.
- 722 Sonenberg, N., and Hinnebusch, A.G. (2009). Regulation of translation initiation in eukaryotes:  
723 mechanisms and biological targets. *Cell* *136*, 731–745.
- 724 Sun, X.-X., DeVine, T., Challagundla, K.B., and Dai, M.-S. (2011). Interplay between Ribosomal  
725 Protein S27a and MDM2 Protein in p53 Activation in Response to Ribosomal Stress. *J. Biol.*  
726 *Chem.* *286*, 22730.
- 727 Sundaramoorthy, E., Leonard, M., Mak, R., Liao, J., Fulzele, A., and Bennett, E.J. (2017).  
728 ZNF598 and RACK1 Regulate Mammalian Ribosome-Associated Quality Control Function by  
729 Mediating Regulatory 40S Ribosomal Ubiquitylation. *Mol. Cell* *65*, 751–760.e4.
- 730 Trapnell, C., Pachter, L., and Salzberg, S.L. (2009). TopHat: discovering splice junctions with  
731 RNA-Seq. *Bioinformatics* *25*, 1105–1111.
- 732 Tunney, R., McGlincy, N.J., Graham, M.E., Naddaf, N., Pachter, L., and Lareau, L.F. (2018).  
733 Accurate design of translational output by a neural network model of ribosome distribution. *Nat.*  
734 *Struct. Mol. Biol.* *25*, 577–582.
- 735 Vassilev, L.T., Vu, B.T., Graves, B., Carvajal, D., Podlaski, F., Filipovic, Z., Kong, N., Kammlott,  
736 U., Lukacs, C., Klein, C., et al. (2004). In vivo activation of the p53 pathway by small-molecule  
737 antagonists of MDM2. *Science* *303*, 844–848.
- 738 Vihervaara, A., Sergelius, C., Vasara, J., Blom, M.A.H., Elsing, A.N., Roos-Mattjus, P., and  
739 Sistonen, L. (2013). Transcriptional response to stress in the dynamic chromatin environment of  
740 cycling and mitotic cells. *Proc. Natl. Acad. Sci. U. S. A.* *110*, E3388–E3397.



- 741 Wang, J., Zhang, J., Lee, Y.M., Ng, S., Shi, Y., Hua, Z.-C., Lin, Q., and Shen, H.-M. (2017).  
742 Nonradioactive quantification of autophagic protein degradation with L-azidohomoalanine  
743 labeling. *Nat. Protoc.* *12*, 279–288.
- 744 Wang, T., Birsoy, K., Hughes, N.W., Krupczak, K.M., Post, Y., Wei, J.J., Lander, E.S., and  
745 Sabatini, D.M. (2015). Identification and characterization of essential genes in the human  
746 genome. *Science* *350*, 1096–1101.
- 747 Watanabe, T., Hiasa, Y., Tokumoto, Y., Hirooka, M., Abe, M., Ikeda, Y., Matsuura, B., Chung,  
748 R.T., and Onji, M. (2013). Protein kinase R modulates c-Fos and c-Jun signaling to promote  
749 proliferation of hepatocellular carcinoma with hepatitis C virus infection. *PLoS One* *8*, e67750.
- 750 Wienert, B., Shin, J., Zelin, E., Pestal, K., and Corn, J.E. (2018). In vitro-transcribed guide RNAs  
751 trigger an innate immune response via the RIG-I pathway. *PLoS Biol.* *16*, e2005840.
- 752 Wu, K., Kovacev, J., and Pan, Z.-Q. (2010). Priming and extending: an UbcH5/Cdc34 E2  
753 handoff mechanism for polyubiquitination on a SCF substrate. *Mol. Cell* *37*, 784.
- 754 Wu, S., Hu, Y., Wang, J.-L., Chatterjee, M., Shi, Y., and Kaufman, R.J. (2002). Ultraviolet light  
755 inhibits translation through activation of the unfolded protein response kinase PERK in the  
756 lumen of the endoplasmic reticulum. *J. Biol. Chem.* *277*, 18077–18083.
- 757 Xue, S., and Barna, M. (2012). Specialized ribosomes: a new frontier in gene regulation and  
758 organismal biology. *Nat. Rev. Mol. Cell Biol.* *13*, 355–369.

## 759 Figure Legends

### 760 **Figure 1. Ribosome proteins RPS27A and RPL40 are downregulated after genome** 761 **editing with Cas9**

762

763 (A) Western blots reveal that RPS27A and RPL40 are depleted in HEK cells after  
764 nucleofection with Cas9 RNP complexes targeting intron 12 of *JAK2* (sgIntron). HEK  
765 cells harvested 72 hours post dCas9-sgIntron nucleofection served as the negative  
766 control.

767

768 (B) Western blots depict rapid loss of Cas9 protein after RNP nucleofection.

769

770 (C) T7 endonuclease 1 assay of *JAK2* editing after Cas9-sgIntron nucleofection  
771 demonstrates that editing is largely complete after 24 hours. Band intensities were  
772 calculated using ImageJ, and percent edited was computed as  $100\% \times (1 - (1 - \text{fraction}$   
773  $\text{cleaved})^{1/2})$ , where fraction cleaved = (sum of cleavage product intensities)/(sum of  
774 uncleaved and cleaved product intensities).

775

776 (D) Western blots of HEK cell lysates treated with different DNA damaging agents show  
777 that RPS27A and RPL40 are depleted after DNA double-strand breaks (DSB) and  
778 not other forms of DNA damage. MMS: methyl methanesulfonate, 0.03%, 1 hour.  
779 Cas9: Cas9-sgIntron nucleofection, 72 hr recovery. H<sub>2</sub>O<sub>2</sub>: hydrogen peroxide. UV:  
780 UV irradiation, 20 J/m<sup>2</sup>, 6 hour recovery. HU: hydroxyurea, 10 mM, 16 hours.  
781 Etoposide: 5 μM, 16 hours. Doxorubicin: 10 μM, 16 hours. DMSO: 0.01%, 16 hours.

782

783 (E) Polysome profiles and ribosome protein Western blots of polysome profiling fractions  
784 from HEK cells treated with DMSO or (F) 5 μM etoposide for 16 hours reveal that  
785 RPL40 and RPS27A are lost from ribosome subunits after DSBs. UV absorbance =  
786 UV absorbance at 254 nm.

787 **Figure 2. Ubiquitins translated from *RPS27A* and *RPL40* decrease after dsDNA**  
788 **breaks**

789

790 (A) Schematic of Cas9 genome editing strategy for introducing the HA epitope tag at the  
791 N-terminus of the ubiquitin translated from *RPS27A*, and a schematic of edited *HA-*  
792 *RPS27A*, *V5-RPL40*, and *Myc-UBC* and their primary translation products. *V5-*  
793 *RPL40* and *Myc-UBC* were edited in a similar fashion as *HA-RPS27A*. (ssODN =  
794 single-stranded oligodeoxynucleotide donor.)

795

796 (B) Western blots depicting reduction of epitope-tagged ubiquitin translated from *V5-*  
797 *RPL40*, *HA-RPS27A*, but not *Myc-UBC*, 16 hours after treatment with 5  $\mu$ M  
798 etoposide or 72 hours after Cas9-sgIntron nucleofection.

799

800 (C) Western blots depicting the time course of depletion and recovery of epitope-tagged  
801 ubiquitin after Cas9-sgIntron nucleofection. apo Cas9 indicates Cas9 nucleofection  
802 without an sgRNA 72 hours post nucleofection.

803

804 (D) Western blots show that total ubiquitin levels are unchanged after treatment with 5  
805  $\mu$ M etoposide or 72 hours after Cas9-sgIntron nucleofection.

806

807 (E) Western blots show that there is no change in total ubiquitin levels 1-3 days after  
808 Cas9-sgIntron nucleofection. dCas9-sgIntron 72 hours after nucleofection served as  
809 the negative control.

810 **Figure 3. RPS27A is proteasomally degraded after dsDNA damage**

- 811
- 812 (A) Abundance of *RPS27A* and *RPL40* transcripts does not change after Cas9 RNP  
813 nucleofection. Fold changes were calculated using the  $2^{-\Delta\Delta Ct}$  method with Cas9  
814 without sglIntron (apo Cas9) as the control and *GAPDH* as the reference gene (n = 3,  
815 error bars = standard deviation).
- 816
- 817 (B) As (A), showing abundance of *RPS27A* and *RPL40* transcripts does not change  
818 after 5  $\mu$ M etoposide treatment for 16 hours.
- 819
- 820 (C) Western blots demonstrate that proteasome inhibition with epoxomicin rescues  
821 *RPS27A* depletion.
- 822
- 823 (D) As in (C), revealing that proteasome inhibition does not block DNA damage induced  
824 *RPL40* depletion.
- 825
- 826 (E) Western blots show that neither DNA damage nor proteasome inhibition affect levels  
827 of ribosomal proteins *RPL22* or *RPL10A*.
- 828
- 829 (F) Western blots confirm the p53 null status of K562 cells and demonstrate that loss of  
830 *RPS27A* is p53-independent.
- 831
- 832 (G) ATM inhibition does not rescue *RPS27A* degradation. Transgenic *RPS27A* with a C-  
833 terminal SBP tag was followed by Western blotting after treatment with 5  $\mu$ M  
834 etoposide and/or 10  $\mu$ M ATM inhibitor, KU 55933. Phospho-ATM served as a  
835 positive control for ATM inhibition.
- 836
- 837 (H) As in (G), showing that ATR inhibition (10  $\mu$ M AZ 20 for 16 hours) does not rescue  
838 *RPS27A* degradation. Phospho-CHK1 served as a positive control for ATR  
839 inhibition.
- 840
- 841 (I) Western blotting reveals a partial rescue of *RPS27A* levels in p53-positive HEK cells  
842 but not p53-null K562 cells when p53 degradation is inhibited with 10  $\mu$ M nutlin.
- 843
- 844 (J) *RPS27A* transcript abundance increases after DNA damage when p53 is stabilized  
845 by nutlin treatment (n = 4, error bars = SD).

846 **Figure 4. Double-strand DNA damaged leads to eIF2 $\alpha$  phosphorylation and**  
847 **reduced translation initiation**

- 848  
849 (A) Polysome profiles of HEK cells treated with 5  $\mu$ M etoposide or 5  $\mu$ M etoposide, 200  
850 nM ISRIB for 16 hours.  
851  
852 (B) AHA bulk translation assay demonstrates that dsDNA damage reduces protein  
853 synthesis. HEK cells were lysed after 16 hours after drug treatment or 72 hours after  
854 nucleofections with RNPs. Two hours before lysis, growth media replaced with  
855 methionine-free media containing a methionine mimic, L-azidohomoalanine (L-AHA).  
856 Lysates were normalized by protein content, labeled with IRDye 800CW-DBCO  
857 Infrared Dye, blotted on a nitrocellulose membrane, and imaged with a LI-COR  
858 Odyssey CLx Imager.  
859  
860 (C) Levels of eIF2 $\alpha$  (S51) phosphorylation increase in HEK cells treated with 5  $\mu$ M  
861 etoposide or nucleofected with Cas9-sgRNA RNPs targeting a *JAK2* intron.  
862 Treatment with 1  $\mu$ M thapsigargin (Thap) for 30 minutes served as a positive control  
863 for eIF2 $\alpha$  phosphorylation.  
864  
865 (D) As in (C), showing that levels of 4E-BP1 (T37/47) phosphorylation do not change  
866 after DNA damage. Treatment with 2.5  $\mu$ M PP242 for 30 minutes served as a  
867 positive control for 4E-BP1 hypo-phosphorylation.  
868  
869 (E) Western blotting indicates that phospho-eIF2 $\alpha$  inhibitor ISRIB rescues loss of RPL40  
870 but not RPS27A after DNA damage.  
871  
872 (F) Only active Cas9 with a targeting gRNA triggers eIF2 $\alpha$  phosphorylation. HEK or  
873 HEK-BFP cells were nucleofected with Cas9 without guide (apo Cas9), dCas9,  
874 Cas9, or nickase Cas9 and guides against a *JAK2* intron (sgIntron), the *AAVS1*  
875 locus (sgAAVS1), or a *BFP* transgene (sgBFP).  
876  
877 (G) Western blotting reveals eIF2 $\alpha$  phosphorylation in T-cells, fibroblasts, and MPB-  
878 CD34+ HSPCs 24 hours after nucleofection with sgCD4 or sgIntron RNPs.

879 **Figure 5. Modulating eIF2 $\alpha$  phosphorylation alters genome editing outcomes**

880

881 (A) T7 Endonuclease 1 assay for genome editing of the transgenic *BFP* locus in HEK-  
882 BFP cells nucleofected with sgBFP-Cas9 (or dCas9) RNPs and treated with 75  $\mu$ M  
883 salubrinal or 200 nM ISRIB for 16 hours. (Image analyzed as in **Figure 3A**).

884

885 (B) Percentage of next generation sequencing (NGS) reads with insertions or deletions  
886 after genome editing, as in (A). Reads were aligned using NEEDLE (Li et al., 2015),  
887 and a modified version of CRISPResso (Pinello et al., 2016) was used to analyze  
888 editing outcomes.

889

890 (C) Sequence identity and frequency of the top five *BFP* indel alleles from one of each  
891 experimental condition quantified in (B).

892 **Figure 6. Genome editing initiates a translational response that proceeds long-**  
893 **term transcriptional changes**

- 894  
895 (A) Experimental design for ribosome profiling and RNA-seq experiments. HEK cells  
896 were nucleofected with Cas9-sgIntron and harvested after 36 or 72 hours. Lysates  
897 were divided between ribosome profiling and RNA-seq experiments.  
898  
899 (B) Distribution of absolute fold changes on a logarithmic scale, for genes identified in  
900 RNA-seq and ribosome profiling experiments at 36 and 72 hours post-editing.  
901 Whiskers denote values  $1.5 \times$  (the interquartile range).  
902  
903 (C) Changes in ribosome footprint versus mRNA abundance (C) 36 hours or (D) 72  
904 hours after Cas9 or dCas9 nucleofection. Green = genes with significant changes in  
905 ribosome footprints. Purple = genes with significant changes in mRNA transcripts  
906 (Wald test, FDR < 0.1).  
907  
908 (E) Cumulative distribution function (CDF) plots for ribosomal protein genes (Ribo),  
909 integrated stress response targets (ISR), and DSB repair genes observed in the  
910 ribosome profiling (E-F) and mRNA-seq (G-H) experiments 36 hours (E and G) or 72  
911 hours (F and H) after Cas9-sgIntron nucleofection. p-values were calculated using  
912 the Mann-Whitney-Wilcoxon rank sum test. See **Table S3** for target set gene lists.

## 913 **STAR Methods**

## 914 **CONTACT FOR REAGENT AND RESOURCE SHARING**

915 Further information and requests for resources and reagents should be directed  
916 to and will be fulfilled by the Lead Contact, Jacob Corn ([jacob.corn@biol.ethz.ch](mailto:jacob.corn@biol.ethz.ch)).

## 917 **EXPERIMENTAL MODEL AND SUBJECT DETAILS**

### 918 **Cell Culture - Immortalized Cell Lines**

919 HEK 293 (ATCC) and HEK Flp-In T-Rex cell lines (Invitrogen) were cultured in  
920 DMEM, high glucose, GlutaMAX (Gibco) with 10% FBS (VWR) in a 37°C incubator with  
921 5.0% CO<sub>2</sub> and 20% O<sub>2</sub>. K562 cells (ATCC) were cultured in RPMI (Gibco) with 10%  
922 FBS (VWR), 10% sodium pyruvate. Human neonatal dermal fibroblasts (ScienCell, Cat#  
923 2310) were cultured in DMEM, high glucose with 10% FBS, 0.01% BME, 1% NEAA, 1%  
924 Sodium Pyruvate, 1% Glutamax, 1% HEPES, 1% pen/strep. Mobilized Peripheral Blood  
925 CD34+ Stem/Progenitor Cells (AllCells) were cultured in StemSpan™ Serum Free  
926 Expansion Media II (STEMCELL Technologies), StemSpan™ StemSpan™ CC110  
927 (STEMCELL Technologies), 1% Pen/Strep.

928

### 929 **Primary T-cell Isolation and Stimulation**

930 Primary human T cells were isolated from two de-identified healthy human  
931 donors from Trima Apheresis leukoreduction chamber residuals (Vitalant, formally Blood  
932 Centers of the Pacific). Peripheral blood mononuclear cells (PBMCs) were isolated by  
933 Ficoll centrifugation using SepMate tubes (STEMCELL, per manufacturer's instructions)



934 then stored frozen in BAMBANKER serum-free freezing medium (Lymphotec Inc, per  
935 manufacturer's instructions) until use. PBMCs were thawed and CD4+ T cells were  
936 further isolated by magnetic negative selection using an EasySep Human CD4+ Cell  
937 Isolation Kit (STEMCELL, per manufacturer's instructions). Immediately following  
938 isolation, CD4+ T cells were then stimulated for 2 days by culture at initial concentration  
939  $1 \times 10^6$  cells/mL in XVivo15 medium (STEMCELL) with 5% Fetal Bovine Serum, 50 mM  
940 2-mercaptoethanol, and 10 mM N-Acetyl L-Cystine together with anti-human CD3/CD28  
941 magnetic Dynabeads (ThermoFisher) at a beads to cells ratio of 1:1, along with a  
942 cytokine cocktail of IL-2 at 200 U/mL (UCSF Pharmacy), IL-7 at 5 ng/mL  
943 (ThermoFisher), and IL-15 at 5 ng/mL (Life Tech).

## 944 **METHOD DETAILS**

### 945 **Cas9 RNP Nucleofection**

946 gRNAs were in vitro transcribed as previously described (DeWitt et al., 2016;  
947 Lingeman et al., 2017). In brief, gRNA transcription template contain a T7 RNA pol  
948 promoter followed by target specific region and constant region (T7FwdVar) along with  
949 primer that is reverse complement of the invariant region of T7FwdVar (T7RevLong)  
950 and amplification primers (T7FwdAmp and T7RevAmp). Transcription templates for  
951 gRNA synthesis were PCR amplified from the primer mix. Phusion high fidelity DNA  
952 polymerase was used for assembly (New England Biolabs). Assembled template was  
953 used without purification for in vitro transcription by T7 polymerase using the HiScribe  
954 T7 High Yield RNA Synthesis Kit (New England Biolabs). RNA was purified with  
955 RNeasy kit (Qiagen). Cas9, dCas9, and D10A Cas9 (nCAs9) proteins were purified  
956 using the protocol detailed in (Lingeman et al., 2017). Cas9, dCas9, and D10A Cas9

957 ribonucleoproteins (RNPs) were prepared as detailed in (Lingeman et al., 2017) with the  
958 exception of the T-cells experiments (see “Cas9 RNP Nucleofections with T-cells”). IVT  
959 gRNAs were used in all experiments except for the 36-hour ribosome profiling  
960 experiment, which used synthetic gRNA (Synthego), and the T-cell nucleofections,  
961 which used synthetic crRNAs and tracrRNAs (Dharmacon).

962 HEK cells were passaged 2 days before nucleofection and trypsinized at 60-90%  
963 confluency. For RNP nucleofections, either 100 pmol Cas9 and 120 pmol gRNA were  
964 added to  $2.5 \times 10^5$  cells in 20  $\mu$ l SF Solution (Lonza), or 300 pmol Cas9 and 300 pmol  
965 guideRNA were added to  $1 \times 10^6$  cells suspended in 100  $\mu$ l SF Solution (Lonza). HEK  
966 cells were nucleofected using program CM-130 in the X Unit of a Lonza 4D-  
967 Nucleofector (AAF-1002X, AAF-1002B) and pre-warmed media was immediately added  
968 to the cuvettes to increase cell viability. K562 cells were nucleofected with Cas9 RNPs  
969 as described for HEK cells using buffer SF and program FF-120; fibroblasts were  
970 nucleofected using buffer P3 and program DT-130. For HSPC nucleofections, 3,000  
971 cells were nucleofected 30 pmol Cas9 and 36 pmol gRNA in solution P3 using pulse  
972 code ER-100 and recovered in 96-well plate.

973

#### 974 **Cas9 RNP Nucleofections with T-Cells**

975 RNPs were produced by complexing a two-component gRNA to Cas9. A crRNA  
976 targeting exon 2 of the human *CD4* gene (UUGCUUCUGGUGCUGCAACU, (Hultquist  
977 et al., 2016)) and tracrRNA were chemically synthesized (Edit-R, Dharmacon).  
978 Lyophilized RNA was resuspended in 10 mM Tris-HCL (7.4 pH) with 150 mM KCl at a  
979 concentration of 160  $\mu$ M, and stored in aliquots at -80 °C. Recombinant Cas9-NLS or

980 dCas9-NLS were purified as detailed in (Lingeman et al., 2017) and stored at 40  $\mu$ M in  
981 20 mM HEPES-KOH pH 7.5, 150 mM KCl, 10% glycerol, 1 mM DTT. crRNA and  
982 tracrRNA aliquots were thawed, mixed 1:1 by volume, and annealed by incubation at 37  
983  $^{\circ}$ C for 30 min to form an 80  $\mu$ M gRNA solution. Cas9 or dCas9 was then mixed with  
984 freshly-annealed gRNA at a 1:1 volume ratio (2:1 gRNA to Cas9 molar ratio) then  
985 incubated at 37  $^{\circ}$ C for 15 min to form a ribonucleoprotein (RNP) at 20  $\mu$ M. RNPs were  
986 electroporated immediately after complexing.

987 Stimulated CD4<sup>+</sup> T cells were harvested from their culture vessels and magnetic  
988 anti-CD3/anti-CD28 Dynabeads were removed by placing cells on an EasySep cell  
989 separation magnet (STEMCELL) for 4 minutes. Immediately prior to electroporation,  
990 cells were centrifuged for 10 minutes at 90 x g, then resuspended in the Lonza  
991 electroporation buffer P3 at a concentration of  $5.0 \times 10^7$  cells per mL. One million CD4<sup>+</sup>  
992 T cells (20  $\mu$ L) and 3  $\mu$ L of Cas9-NLS RNP, dCas9-NLS RNP, or Tris buffer were added  
993 to each well of a 96-well electroporation plate (Lonza) in three replicates for each  
994 condition for each of two cell donors. Electroporation was performed with a Lonza 4D  
995 96-well electroporation system with pulse code EH115. 15 minutes following  
996 electroporation, each well was split between three replicate 96-well plates and cultured  
997 in XVivo15-base growth medium (as above) supplemented with 500 U/mL IL-2 at an  
998 approximate density of  $1 \times 10^6$  cells per mL of media.

999 Approximately 20 hours after electroporation, lysates were prepared for Western  
1000 blot analysis from samples from one replicate plate of edited T-cells. Cells were  
1001 collected and centrifuged at 300 x g for 5 minutes. Culture media was aspirated off the  
1002 cells, and cells were resuspended in PBS. This was repeated for a total of 2 PBS

1003 washes. After the final wash, cells were resuspended in 1X RIPA Lysis buffer (Cell  
1004 Signaling Technologies) with Protease Inhibitor and Phosphatase inhibitor (Cell  
1005 Signaling Technologies), incubated 10 minutes on ice, then stored at -80 °C.

1006 Three days after electroporation, samples from a second replicate of edited T  
1007 cells was collected and stained with Anti-CD3-PE (clone UCHT1, Biolegend), Anti-CD4-  
1008 PECy7 (clone OKT4, Biolegend), and GhostDye780 (Tonbo). Fluorescence was  
1009 measured on an Attune NxT Flow Cytometer (Thermo Fisher Scientific) and analyzed  
1010 using FlowJo (Treestar, Inc) for presence or knockdown of surface expression of CD4.

1011

## 1012 **Western Blotting**

1013 Cells were pelleted at 400 x g for 5 minutes then washed twice with PBS before  
1014 being lysed in RIPA buffer (1% SDS, 50 mM Tris HCl, pH 8.0 with 1X Halt Protease  
1015 Inhibitor Cocktail or 1X Halt Protease and Phosphatase Inhibitor Cocktail, (Thermo  
1016 Scientific). Lysates were incubated for 30 minutes on ice, vortexed for 30 seconds, and  
1017 spun at 18,000 x g for 10 minutes at 4°C. Lysates were normalized using either BCA  
1018 Assay (Pierce) or a Bradford Assay (Proteomics Grade, VWR) before being boiled at  
1019 97°C for 5 minutes with Laemmli buffer or Novex LDS Sample Buffer (Thermo Fisher  
1020 Scientific). Samples were loaded onto NuPAGE 4-12% Bis-Tris Gels (Invitrogen) or  
1021 Mini-Protean TGX precast gels (Bio-Rad) and run for 200V for 40 minutes.

1022 Proteins were transferred onto nitrocellulose membranes using the Trans-Blot  
1023 Turbo Blotting System (Bio-Rad) according to the manufacturer's protocol. Membranes  
1024 were blocked in 5% milk in TBST, washed 3 x 5 minutes in TBST, and incubated with  
1025 primary antibodies in TBST with 5% BSA overnight at 4°C. Membranes were washed 3

1026 x 5 minutes in TBST and incubated with either IRDye 800CW (LI-COR), IRDye 680RD  
1027 (LI-COR), or HRP-conjugated secondary antibodies in 5% milk for 40 minutes before 2  
1028 x 5 minute washes with TBST and 1 x 5 minute wash with PBS. Blots were imaged by a  
1029 LI-COR Odyssey CLx Imager or Pierce ECL reagents (Thermo Fisher) and X-ray film.  
1030 All primary antibodies were used at a 1:1000 dilution except for anti-p53 (1:500, Santa  
1031 Cruz Biotechnology, Cat# sc-126) and anti-phospho-ATM (1:50,000, Abcam, Cat#  
1032 ab81292). See Key Resources Table for the complete list of antibodies.

1033

#### 1034 **T7 Endonuclease 1 Assay**

1035 Edited cells were gathered off of plates with a pipette, spun at 10,000 x g for 1  
1036 min, washed once with PBS, and lysed in QuickExtract™ DNA Extraction Solution  
1037 (Lucigen). Lysates were incubated at 65°C for 6 minutes and 98°C for 2 minutes in a  
1038 thermocycler. Edited regions were PCR amplified in 100 ul reactions with AmpliTaq  
1039 Gold 360 Master Mix (Thermo Fisher Scientific). PCR products were purified using  
1040 MinElute PCR Purification Kit (Qiagen). PCR products were hybridized and digested  
1041 with T7 endonuclease 1 (NEB) according to the NEB protocol for determining genome  
1042 targeting efficiency. Digests were run on a 2% agarose gel. Relative intensities from  
1043 DNA bands were quantified using ImageJ (Schindelin et al., 2015) with % edited =  $100 \times$   
1044  $(1 - (1 - \text{fraction cleaved})^{1/2})$  where fraction cleaved = (sum of cleavage product  
1045 intensities)/(sum of uncleaved and cleaved product intensities).

1046

1047 **Inducing DNA Damage**

1048 For chemically inducing double-strand DNA damage, HEK cells were grown to  
1049 70% confluency then treated for 16 hours with 5  $\mu$ M etoposide (Sigma-Aldrich) or 10  $\mu$ M  
1050 doxorubicin (Sigma-Aldrich). For chemically inducing other forms of DNA damage, HEK  
1051 cells were treated with 0.03% methyl methanesulfonate (MMS) for 1 hour, 500  $\mu$ M  
1052 hydrogen peroxide for 1 hour, or 10 mM hydroxyurea for 16 hours. To damage cells  
1053 using ultraviolet light, cells were irradiated at 20 J/m<sup>2</sup> with a FB-UVXL-1000 UV  
1054 Crosslinker (Fisher Scientific) and recovered for 6 or 24 hours before lysis. Cells were  
1055 treated with DMSO for 16 hours as a negative control unless otherwise noted.

1056

1057 **Polysome Profiling**

1058 HEK cells cultured in 10 cm plates were washed with 10 ml DPBS before lysis  
1059 with ice cold 100-400  $\mu$ l polysome buffer (20 mM Tris pH 7.4, 150 mM NaCl, 5 mM  
1060 MgCl<sub>2</sub>, 1 mM DTT, 100  $\mu$ g/mL cycloheximide) with 1% Triton X-100 and 25 U/ml  
1061 TURBO DNase (Thermo Fisher Scientific). When polysome profiling fractions were  
1062 collected for protein analysis, 2X protease inhibitor cocktail (P1860, Sigma) was added  
1063 to the lysis buffer and sucrose gradients. The amount of cells varied between  
1064 experiments but was generally between 1-8 x 10<sup>6</sup> cells per biological condition. Cells  
1065 were scraped off plates in lysis buffer and incubated on ice in microcentrifuge tubes for  
1066 10 minutes. Lysates were spun at 10 minutes at 20,000xg, and the supernatants were  
1067 normalized using the Quant-iT RiboGreen RNA Assay Kit (Thermo Fisher Scientific).

1068 6 ml 50% (w/v) sucrose in polysome buffer was layered under 6 ml 10% sucrose  
1069 solution in 14 x 89 mm ultracentrifuge tubes (VWR), and 10-50% sucrose gradients

1070 were created using a Gradient Master (BioComp Instruments) with rotation set at 81.5°,  
1071 speed 16 for 1:58. 200 µl normalized cell lysate (with RNA concentrations generally  
1072 between 50-250 ng/µl) was layered on top of the gradients, and the gradients were  
1073 loaded into Beckman Sw41 Ti rotor buckets and spun at 36,000 rpm (~250,000xg) for  
1074 2.5 or 3 hours at 4°C in a Beckman L8-M Ultracentrifuge. Sucrose gradients were  
1075 pumped through the Gradient Master at 0.2 mm/s, and UV absorbance at 254 nm was  
1076 measured using a BioRad EM-1 Econo UV Monitor connected to a laptop running the  
1077 Logger Lite software package (Vernier). Depending on the downstream experiment,  
1078 fractions were manually collected every 20 to 24 seconds for a total of 15-18 fractions  
1079 per sucrose gradient. Proteins were extracted for Western blots using  
1080 methanol/chloroform extraction as detailed in Click-it Metabolic Labeling Reagents for  
1081 Proteins (Invitrogen), and pellets were boiled at 95°C in 1X Laemmli buffer before SDS-  
1082 PAGE.

1083

#### 1084 **RT-qPCR**

1085 RNA was extracted from cells using the Direct-zol™ RNA MiniPrep Kit (Zymo)  
1086 according to the manufacturer's instructions. 1 µg total RNA was used for reverse  
1087 transcription with Superscript III First Strand Synthesis SuperMix (Thermo Fisher  
1088 Scientific). qRT-PCR was performed using Fast SYBR Green Master Mix (Applied  
1089 Biosystems) on a StepOnePlus Real-Time PCR System (Applied Biosystems).  $C_t$   
1090 values from target genes were normalized to *GAPDH*, and the expression of each gene  
1091 was represented as  $2^{-(\Delta\Delta C_t)}$  relative to the reference sample.

1092

## 1093 **Endogenous Tagging of Ubiquitin Genes**

1094           We used Cas9 genome editing to endogenously tag the N-terminal ubiquitins of  
1095 *RPS27A*, *RPL40* (also known as *UBA52*), and *UBC* genes with the HA, V5, and Myc  
1096 tags, respectively. We designed gRNA sequences upstream of the *RPS27A*, *RPL40*,  
1097 and *UBC* ubiquitin sequences using the CRISPR Design Tool (Hsu et al., 2013) (See  
1098 “Key Resources Table” for guide RNA sequences). To construct the *Myc-UBC* cell line,  
1099 a gene block (Dharmacon) containing the Myc-tag sequence flanked by 1000 bp  
1100 homology arms on both ends was Gibson-assembled into a *Sma*I-digested pUC19 vector  
1101 backbone (Addgene) to make pUC19-Myc-UBC. Single-stranded oligodeoxynucleotides  
1102 (ssODN, IDT) were designed to introduce the HA-tag and V5-tag at the *RPS27A* and  
1103 *RPL40* loci, respectively. Plasmid and ssODN donors contained mutations in the PAM  
1104 sequences at each cut site to prevent Cas9 from cutting the edited loci.

1105           Using a Lonza 4D nucleofector,  $2 \times 10^5$  HEK 293 cells were nucleofected with  
1106 preassembled Cas9 RNP complex together with 100 pmol donor ssODN or 750 ng  
1107 donor plasmid (see “gRNA and Cas9 Preparation” and “Cas9 RNP Nucleofection”  
1108 above for more details). 48 hours after nucleofection, single cells were dispersed into  
1109 four 96-well plates to isolate clones. To genotype clones, cells were lysed in  
1110 QuickExtract™ DNA Extraction Solution (Lucigen, see “T7 Endonuclease 1 Assay” for  
1111 more details), and the edited region was PCR amplified. PCR fragments were TOPO  
1112 cloned (Thermo Fisher Scientific), and plasmids were analyzed by Sanger sequencing.

1113

1114

1115



## 1116 **Chemical Genetics**

1117 We used a variety of chemical inhibitors to identify the pathways regulating  
1118 RPS27A and RPL40 depletion. To prevent proteasomal degradation during DNA  
1119 damage, cells were treated with 50  $\mu$ M epoxomicin (Calbiochem) for 1 hour before cells  
1120 were treated with 5  $\mu$ M etoposide or 50  $\mu$ M epoxomicin for 16 hours. 10  $\mu$ M KU 55933  
1121 (Tocris) or 10  $\mu$ M AZ 20 (Tocris) was co-administered with etoposide for 16 hours to  
1122 inhibit the ATM and ATR pathways, respectively. MDM2-mediated degradation of p53  
1123 was prevented after DNA damage with co-administration of 10  $\mu$ M nutlin (Sigma-  
1124 Aldrich) and 5  $\mu$ M etoposide over a 16-hour time course.

1125 To rescue downstream effects of eIF2 $\alpha$  phosphorylation after DNA damage, 200  
1126 nM ISRIB (Sigma-Aldrich) was added at the same time as etoposide. Cells were treated  
1127 with 1  $\mu$ M thapsigargin (Sigma-Aldrich) or 2.5  $\mu$ M PP242 (Sigma-Aldrich) for 30 minutes  
1128 as controls for eIF2 $\alpha$  phosphorylation or 4E-BP1 hypo-phosphorylation, respectively. To  
1129 determine the effects of modulating eIF2 $\alpha$  phosphorylation on genome editing, HEK-  
1130 BFP or K562-BFP cells were treated with 10, 50, or 75  $\mu$ M salubrinal (Tocris) or 200 nM  
1131 ISRIB (Sigma-Aldrich) for 16 or 24 hours post Cas9 RNP nucleofection.

1132

## 1133 **Generating RPS27A-SBP Flp-In Cell Lines**

1134 RNA from HEK cells was isolated using the DirectZol RNA MiniPrep Kit (Zymo)  
1135 according to the manufacturer's protocol. cDNA was generated using SuperScript II  
1136 Reverse Transcriptase (Thermo Fisher Scientific), and coding regions of RPS27A with  
1137 and without the N-terminal ubiquitin sequence was PCR amplified and cloned into a

1138 pcDNA5/FRT/TO vector backbone (Invitrogen) that had been previously modified to  
1139 have a constitutive CMV promoter and C-terminal SBP-tag.

1140 To generate stable transgenic cell lines,  $1 \times 10^6$  HEK Flp-In T-Rex Cells  
1141 (Invitrogen) were nucleofected using a Lonza 4D nucleofector in according to the  
1142 Amaxa 4D-Nucleofector™ Protocol for HEK293 (Lonza) for large cuvettes with 1.8  $\mu$ g  
1143 pOG44 Flp-Recombinase Expression Vector and 0.2  $\mu$ g pCMV-RPS27A-SBP or pCMV-  
1144 Ub-RPS27A-SBP. Two days after nucleofection, cells were passaged and placed on  
1145 media containing 5  $\mu$ g/ml blasticidin (Invitrogen) and 10  $\mu$ g/ml Hygromycin B (Thermo  
1146 Fisher Scientific) until all cells from a control plate nucleofected with pmaxGFP™ Vector  
1147 (Lonza) were dead. Flp-In cell lines were validated using anti-SBP Westerns and  
1148 Sanger sequencing of the transgenic insert.

1149

#### 1150 **Ubiquitin Blots of Denatured RPS27A-SBP**

1151 RPS27A-SBP Flp-In HEK cells were lysed in binding buffer (300 mM NaCl, 0.5%  
1152 NP-40, 50 mM Na<sub>2</sub>HPO<sub>4</sub>, 50 mM Tris pH 8) with 8M urea using the protocol detailed in  
1153 “Western Blotting.” Samples were diluted 1:3 with binding buffer, and normalized  
1154 lysates were incubated at 4 °C for 30 minutes with 60  $\mu$ l buffer-equilibrated  
1155 Dynabeads™ M-270 Streptavidin (Invitrogen). Beads were washed 5 times with 200-  
1156 500  $\mu$ l binding buffer containing 1M NaCl. To elution proteins, beads were boiled in 25  
1157  $\mu$ l 1X NuPAGE loading buffer at 97 °C for 5 minutes. Westerns were performed as  
1158 detailed in “Western Blotting.”

1159

1160

1161 **siRNA Knockdowns**

1162 siRNA oligonucleotides (see “Key Resources Table” below) were transiently  
1163 transfected into cells using RNAiMAX (Invitrogen) according to manufacturer  
1164 instructions. For each well in 12-well plate, 120 pmol siRNA and 3.6  $\mu$ l RNAiMAX were  
1165 used. Cells were transfected with siRNAs 24 hours prior to drug treatment or Cas9  
1166 nucleofection.

1167

1168 **pHA-Ub Immunoprecipitations**

1169 10 cm plates HEK293 or RPS27A-SBP Flp-In cells were transiently transfected  
1170 with 10  $\mu$ g of HA-UB plasmid (gift from Rape lab) with Lipofectamine 3000 (Thermo  
1171 Fisher Scientific) for 48 hours. Immunoprecipitation was performed using Pierce Anti-HA  
1172 Magnetic Beads Kit (Thermo Fisher) according to the manufacturer. 1 mg of cell lysate  
1173 and 50  $\mu$ l beads were used to perform each immunoprecipitation. After overnight  
1174 incubation at 4  $^{\circ}$ C, the beads were washed twice with IP buffer supplemented with 500  
1175 mM NaCl and twice with regular IP buffer and proteins were eluted by boiling samples  
1176 at 98 $^{\circ}$ C in 1X NuPAGE LDS sample buffer (Thermo Fisher) for 5 min. When siRNA was  
1177 used, cells were first transfected with siRNAs and after 24 hours, with the HA-Ub  
1178 plasmid. Lysates were prepared 48 hours after the second transfection with drug  
1179 treatment with epoxomicin and etoposide occurring 17 hours and 16 hours before lysis,  
1180 respectively.

1181

1182

1183

## 1184 **Bulk Translation Assays**

1185           10 cm plates of HEK cells were washed with PBS then placed in 25  $\mu$ M Click-IT  
1186 L-Azidohomoalanine (Thermo Fisher Scientific) in DMEM, high glucose, no glutamine,  
1187 no methionine, no cysteine (Gibco) with 10% FBS for 2 hours. Cells were trypsinized  
1188 then pelleted at 400 x g for 5 minutes. Cells were washed three times with PBS before  
1189 being lysed in 200  $\mu$ l lysis buffer (1% SDS, 50 mM Tris HCl, pH 8.0, 1X Halt Protease  
1190 Inhibitor Cocktail, Thermo Scientific) with 150 U/ml benzonase nuclease to digest DNA  
1191 and RNA. Lysates were incubated for 30 minutes on ice, vortexed for 5 seconds, and  
1192 spun at 18,000 x g for 10 minutes at 4 °C. Protein content of the supernatants was  
1193 normalized using the Pierce BCA Protein Assay (Thermo Fisher Scientific). 1  $\mu$ l 10 mM  
1194 IRDye 800CW DBCO Infrared Dye was added to the lysates, and the lysates were  
1195 incubated for 2 hours at RT. Unbound IR Dye was removed using a Zeba Column, 7K  
1196 MWCO, 0.5 mL (Thermo Fisher Scientific). For dot blot analysis, a Bio-Dot  
1197 Microfiltration Apparatus (Bio-Rad) was used according to the manufacturer's protocol  
1198 and 20  $\mu$ l sample dilutions were added to wells. Membranes were imaged on a LI-COR  
1199 Odyssey CLx Imager. For protein gel analysis, lysates were combined with 2X Laemmli  
1200 Buffer, incubated at 97 °C for 5 min, then run on a Nupage 4-12% Bis-Tris Gel  
1201 (Invitrogen) at 200V for 40 min. The gel was washed with PBS (3 x 5 minutes) before  
1202 imaging with a LI-COR Odyssey CLx Imager.

1203

## 1204 **NGS Analysis of Editing Outcomes**

1205           HEK cells carrying a single copy of a BFP transgene were nucleofected with  
1206 Cas9-sgBFP or dCas9-sgBFP and recovered in media containing 75  $\mu$ M salubrinal or

1207 200 nM ISRIB for 24 hours. gDNA extraction and 50  $\mu$ l PCRs (PCR1, see “Key  
1208 Resources Table” for sequences) of the edited genomic loci were prepared as detailed  
1209 in “T7 Endonuclease 1 Assay.”

1210 PCR1 reactions were cleaned up using SPRI bead purification. A 50 mL stock  
1211 solution of SPRI beads was prepared in advance: 1 ml SPRI beads (Sera-Mag  
1212 SpeedBeads® Carboxyl Magnetic Beads) were brought to room temperature and  
1213 washed three times with TE buffer before suspended to 50 ml in 18% PEG-8000, 1 M  
1214 NaCl, 10 mM Tris-Cl (pH 8.0), 1 mM EDTA, and 0.055% Tween-20. To purify PCR  
1215 products, 90  $\mu$ l SPRI bead suspension solution was added to 50  $\mu$ l PCR reactions in a  
1216 96 well plate. The solution was mixed 10 times with a pipette and incubated at room  
1217 temperature for 1 minute. The plates were placed on a magnetic stand for 2 minutes,  
1218 and the supernatant was discarded. 200  $\mu$ l 80% ethanol was added then removed after  
1219 2 minutes while the plate remained on the magnetic stand. The ethanol wash and  
1220 removal steps were repeated one more time for a total of two washes. The beads were  
1221 left to air dry for 3-10 minutes. To elute the purified PCR1 products from the beads,  
1222 beads were resuspended in 20  $\mu$ l ultra-pure water and incubated for 2 minutes. The  
1223 plate was placed on a magnetic stand for 1 minute, and the supernatant was collected.  
1224 Concentrations of purified PCR1 products were quantified using the Qubit™1X dsDNA  
1225 HS Assay with the Invitrogen Qubit™4 Fluorometer (Thermo Fisher Scientific) as per  
1226 the manufacturer’s instructions.

1227 To add Illumina adaptors to the PCR1 products, a second PCR reaction was  
1228 performed with PrimeSTAR GXL DNA Polymerase (Takara) in a 25  $\mu$ l reaction with 10  
1229 ng PCR1 product and 0.5  $\mu$ M adaptor according to the manufacturer’s instructions. We

1230 used adaptors from a custom set of 960 unique combinatorial Illumina TruSeq indices  
1231 (IDT) supplied by the Vincent J. Coates Genomics Sequencing Laboratory at UC  
1232 Berkeley. The samples were amplified for 12 cycles consisting of: 95 °C for 10 seconds,  
1233 57 °C for 15 seconds, and 65 °C for 30 seconds. PCR2 products were purified and  
1234 quantified as detailed above. A Biomek FXp Liquid Handler (Beckman Coulter) was  
1235 used to pool 50 ng of each PCR product, and a 5300 Fragment Analyzer (Advanced  
1236 Analytical) was used to assess the concentration and quality of the pool before  
1237 sequencing.

1238         Samples were deep sequenced on an Illumina MiSeq at 300 bp paired-end reads  
1239 to a depth of at least 10,000 reads. A modified version of CRISPResso (Pinello et al.,  
1240 2016) was used to analyze editing outcomes and to plot mutation position distributions.  
1241 Briefly, reads were adapter trimmed then joined before performing a global alignment  
1242 between sequence reads and the *BFP* reference sequences using NEEDLE (Li et al.,  
1243 2015). Indel rates were calculated as any reads where an insertion or deletion overlaps  
1244 the cut site or occurs within three base pairs of either side of the cut site divided by the  
1245 total number of reads.

1246

#### 1247 **Ribosome Profiling and RNA-seq**

1248         Paired ribosome profiling and RNA-seq experiments were conducted on HEK  
1249 293 cells lysed 36 and 72 hours after Cas9 or dCas9 RNP nucleofection. Cas9 and  
1250 dCas9 complexed with sgIntron, a guide targeting intron 12 of *JAK2*, were nucleofected  
1251 using the protocols detailed in “Cas9 RNP Nucleofections” above. Four small-scale  
1252 nucleofections were pooled directly into one 10 cm plate to create one biological

1253 replicate with each experimental condition having two biological replicates. Due to  
1254 recent reports about IVT guide RNAs inducing interferon responses in cells (Kim et al.,  
1255 2018; Wienert et al., 2018), synthetic gRNAs (Synthego) were used at the 36 hour time  
1256 point.

1257 Ribosome profiling was conducted as detailed in (McGlinicy and Ingolia, 2017)  
1258 with the following modifications. Since Epicentre discontinued the yeast 5'-deadenylase  
1259 (Cat# DA11101K) we used in our published protocol, we cloned a 5'-deadenylase  
1260 (*HNT3*) from the thermotolerant yeast *Kluyveromyces marxianus* into the pET His6 TEV  
1261 LIC cloning vector (2B-T) backbone (gift from Scott Gradia to Addgene). Recombinant  
1262 6xHis-TEV-Km-HNT3 was purified from *E. coli* using a Nickel column purification  
1263 (HisTrap FF Crude column, GE Life Sciences). Protein eluted from the column with  
1264 imidazole was cleaved with TEV protease, and the residual His tag was removed using  
1265 a Nickel column. The recombinant protein subsequently purified using size exclusion  
1266 chromatography (Sephacryl S-300 16/60 column, GE Life Sciences). 0.5 µl of purified  
1267 protein was added in place of the yeast 5'-deadenylase during ribosome profiling, and  
1268 the reaction was incubated at 37 °C instead of 30 °C.

1269 We also deviated from the McGlinicy and Ingolia 2017 protocol by using  
1270 Circligase I instead of Circligase II. We made this change after concerns about the  
1271 nucleotide bias of Circligase II were reported in (Tunney et al., 2018). Therefore, we  
1272 reverted to using Circligase I as previously detailed in (Ingolia et al., 2012) with a 2  
1273 hour incubation step.

1274 Total RNA for mRNA-seq was isolated from 50 µl cell lysate using the  
1275 DirectZol™ RNA MiniPrep Kit (Zymo) according to the manufacturer's protocol.

1276 Sequencing libraries were prepared using the TruSeq Stranded Total RNA Library Kit  
1277 with Ribo-Zero Gold (Illumina). Ribosome profiling and RNA-seq libraries were  
1278 sequenced as 50 nt single-end reads on an Illumina HiSeq 4000.

1279 Reads from ribosome profiling were processed as detailed in (McGlincy and  
1280 Ingolia, 2017). Ribosome profiling and RNA-seq reads from the 36 hour time point were  
1281 aligned with HiSat2 (Kim et al., 2015) to the Human GENCODE Gene Release  
1282 GRCh38.p2 (release 22); reads from the 72 hour time point were aligned with TopHat  
1283 (Trapnell et al., 2009) to GRCh38.p7 (release 25). Alignments were indexed using  
1284 Samtools (Li et al., 2009), and the number of reads per transcript was tabulated using  
1285 fp-count (Ingolia et al., 2014) with the basic gene annotations from GRC38.p2 (36 hr)  
1286 and GRCh38.p7 (72 hr). Differential changes in gene expression were calculated using  
1287 DESeq2 (Love et al., 2014) with a cutoff of FDR < 0.1 for per-gene significance.  
1288 Translational efficiency (the ratio of ribosome footprints to mRNA-seq transcripts)  
1289 calculations and significance tests were made in DESeq2 using a design matrix that  
1290 tests the ratio of ratios (design = ~ A + B + A:B, where A is Cas9 type and B is library  
1291 type) with FDR < 0.1.

1292 Cumulative distribution functions and Mann-Whitney-Wilcoxon tests with  
1293 ribosome profiling and RNA-seq data were calculated in RStudio. Three gene lists were  
1294 used for this analysis: ISR targets, ribosome proteins, and DSB break repair genes. ISR  
1295 (Integrated Stress Response) targets are the 78 genes identified by (Sidrauski et al.,  
1296 2015) to have a statistically significant, greater than twofold change in translational  
1297 efficiency after tunicamycin treatment. (6 of the 78 genes were removed from analysis  
1298 because we were unable to identify corresponding GRCh38 Ensembl gene IDs from the



1299 original GRCh37 UCSC gene IDs listed in Sidrauski et al., 2015.) Ribosome proteins  
1300 are the 80 core ribosomal protein genes expressed in humans. DSB break repair genes  
1301 are 44 genes from the union of genes annotated as DSB repair genes in **Table S3** from  
1302 (Chae et al., 2016) and on the University of Pittsburgh Cancer Institute's DNA Repair  
1303 Database website (<https://dnapittcrew.upmc.com/db/index.php>).

1304

### 1305 **QUANTIFICATION AND STATISTICAL ANALYSIS**

1306 Bar graphs, scatterplots, stripcharts, and cumulative distribution function plots  
1307 were created with RStudio version 1.0.136 running R version 3.3.2. Standard statistical  
1308 analyses such as standard deviation calculations and Mann-Whitney-Wilcoxon tests  
1309 were conducted in R. FDR values for RNA-seq and ribosome profiling were calculated  
1310 using the Wald test in DESeq2 as described in (Love et al., 2014). Statistical details of  
1311 experiments such as sample size (n) can be found in the figures and figure legends. For  
1312 this paper, n = number of biological replicates and SD = standard deviation assuming a  
1313 normal distribution.

1314

### 1315 **DATA AND SOFTWARE AVAILABILITY**

1316 Ribosome profiling and mRNA-Seq data are available from NCBI GEO, Accession  
1317 #GSE122615.

1318

1319 **KEY RESOURCES TABLE**

| REAGENT or RESOURCE                                             | SOURCE                    | IDENTIFIER                      |
|-----------------------------------------------------------------|---------------------------|---------------------------------|
| <b>Antibodies</b>                                               |                           |                                 |
| 4E-BP1 Rabbit Polyclonal Ab                                     | Cell Signaling Technology | Cat# 9452, RRID:AB_331692       |
| Phospho-4E-BP1 (T37/46) Rabbit Monoclonal Ab, Clone 236B4       | Cell Signaling Technology | Cat# 2855, RRID:AB_560835       |
| GAPDH Rabbit Monoclonal Ab, Clone 14C10                         | Cell Signaling Technology | Cat# 2118, RRID:AB_561053       |
| eIF2 $\alpha$ Rabbit Polyclonal Ab                              | Cell Signaling Technology | Cat# 9722, RRID:AB_2230924      |
| Phospho-eIF2 $\alpha$ (S51) XP Rabbit Monoclonal Ab, Clone D9G8 | Cell Signaling Technology | Cat# 3398, RRID:AB_2096481      |
| RPS27A Mouse Monoclonal Ab, Clone 3E2-E6                        | Abcam                     | Cat# ab57646, RRID:AB_2180587   |
| $\gamma$ -Tubulin Rabbit Polyclonal Ab                          | Santa Cruz Biotechnology  | Cat# sc-7396-R, RRID:AB_1120814 |
| Cas9 Mouse Monoclonal Ab, Clone 7A9-3A3                         | Active Motif              | Cat# 61578, RRID: none          |
| UBA52 (RPL40) Rabbit Polyclonal Ab                              | Thermo Fisher Scientific  | Cat# PA5-23685, RRID:AB_2541185 |

|                                                         |                           |                                    |
|---------------------------------------------------------|---------------------------|------------------------------------|
| RPS10 Rabbit Polyclonal Ab                              | Novus Biological          | Cat# NBP1-98599,<br>RRID: none     |
| RPL10A Rabbit Polyclonal Ab                             | Bethyl                    | Cat# A305-062A,<br>RRID:AB_2631457 |
| V5-Tag Rabbit Monoclonal Ab, Clone D3H8Q                | Cell Signaling Technology | Cat# 13202,<br>RRID:AB_2687461     |
| Myc-Tag Mouse Monoclonal Ab, Clone 9B11                 | Cell Signaling Technology | Cat# 2276,<br>RRID:AB_331783       |
| HA-Tag Rabbit Monoclonal Ab, Clone C29F4                | Cell Signaling Technology | Cat# 3724,<br>RRID:AB_1549585      |
| Human HA Mouse Monoclonal Ab, Clone HA-7                | Sigma-Aldrich             | Cat# H3663,<br>RRID:AB_262051      |
| Ubiquitin Mouse Monoclonal Ab, Clone P4D1               | Cell Signaling Technology | Cat# 3936S,<br>RRID:AB_10691572    |
| RPL22 Rabbit Polyclonal Ab                              | Abcam                     | Cat# ab77720,<br>RRID:AB_1952492   |
| P53 Mouse Monoclonal Ab, Clone DO-1                     | Santa Cruz Biotechnology  | Cat# sc-126,<br>RRID:AB_628082     |
| SBP Tag Mouse Monoclonal Ab, Clone SB19-C4              | Santa Cruz Biotechnology  | Cat# sc-101595,<br>RRID:AB_1128239 |
| Phospho-ATM (S1981) Rabbit Monoclonal Ab, Clone EP1890Y | Abcam                     | Cat# ab81292,<br>RRID:AB_1640207   |

|                                                                        |                           |                                 |
|------------------------------------------------------------------------|---------------------------|---------------------------------|
| ATM Rabbit Monoclonal Ab, Clone D2E2                                   | Cell Signaling Technology | Cat# 2873S, RRID:AB_2062659     |
| MDM2 Mouse Monoclonal Ab, Clone SMP14                                  | Santa Cruz Biotechnology  | Cat# sc-965, RRID:AB_627920     |
| Ubiquitin Linkage-Specific K48 Rabbit Monoclonal Ab, Clone EP8589      | Abcam                     | Cat# ab140601, RRID: None       |
| Ubiquitin Linkage-Specific K63 Rabbit Monoclonal Ab, Clone EPR8590-448 | Abcam                     | Cat# ab179434, RRID: None       |
| Linear (M1) Polyubiquitin Mouse Monoclonal Ab, Clone LUB9              | LifeSensors               | Cat# AB130, RRID:AB_2576211     |
| ZNF598 Rabbit Polyclonal Ab                                            | Bethyl                    | Cat# A305-108A, RRID:AB_2631503 |
| RPS6 Rabbit Polyclonal Ab                                              | Bethyl                    | Cat# A300-557A, RRID:AB_477988  |
| $\beta$ -TRCP Rabbit Monoclonal Ab, Clone D13F10                       | Cell Signaling Technology | Cat# 4394S, RRID:AB_10545763    |
| CREB-2 (ATF4) Rabbit Polyclonal Ab                                     | Santa Cruz Biotechnology  | Cat# sc-200, RRID:AB_2058752    |
| PKR Rabbit Polyclonal Ab                                               | Cell Signaling Technology | Cat# 3072, RRID:AB_10693467     |
| CHK1 Mouse Monoclonal Ab, Clone 2G1D5                                  | Cell Signaling Technology | Cat# 2360, RRID:AB_2080320      |

|                                                             |                           |                                                                             |
|-------------------------------------------------------------|---------------------------|-----------------------------------------------------------------------------|
| Phospho-CHK1 (Ser345) Rabbit Polyclonal Ab                  | Cell Signaling Technology | Cat# 2341, RRID:AB_330023                                                   |
| Human CD3 PE-Conjugated Mouse Monoclonal Ab, Clone UCHT1    | Biolegend                 | Cat# 300407, RRID:AB_314061                                                 |
| Human CD4 PE/Cy7-Conjugated Mouse Monoclonal Ab, Clone OKT4 | Biolegend                 | Cat# 317414, RRID:AB_571959                                                 |
| <b>Biological Samples</b>                                   |                           |                                                                             |
| Human Peripheral Blood Mononuclear Cells (PBMCs)            | Vitalant                  | <a href="https://vitalant.org/Home.aspx">https://vitalant.org/Home.aspx</a> |
| <b>Chemicals, Peptides, and Recombinant Proteins</b>        |                           |                                                                             |
| Etoposide                                                   | Sigma-Aldrich             | Cat# E1383, CAS# 33419-42-0                                                 |
| Methyl methanesulfonate                                     | Sigma-Aldrich             | Cat# 129925, CAS# 66-27-3                                                   |
| Hydroxyurea                                                 | Sigma-Aldrich             | Cat# H8627, CAS# 127-07-1                                                   |
| Thapsigargin                                                | Sigma-Aldrich             | Cat# T9033, CAS# 67526-95-8                                                 |
| PP242 hydrate                                               | Sigma-Aldrich             | Cat# P0037, PubChem 329819988                                               |
| Doxorubicin hydrochloride                                   | Sigma-Aldrich             | Cat# D1515, CAS# 25316-40-9                                                 |

|                                                             |                          |                                     |
|-------------------------------------------------------------|--------------------------|-------------------------------------|
| Epoxomicin                                                  | Calbiochem               | Cat# 324800, CAS# 134381-21-8       |
| KU 55933                                                    | Tocris                   | Cat# 3544, CAS# 587871-26-9         |
| AZ 20                                                       | Tocris                   | Cat# 5198, CAS# 1233339-22-4        |
| Nutlin-3                                                    | Sigma-Aldrich            | Cat# N6287, CAS# 548472-68-0        |
| ISRIB                                                       | Sigma-Aldrich            | Cat# SML0843, PubChem SID 329825607 |
| Salubrial                                                   | Tocris                   | Cat# 2347, CAS#405060-95-9          |
| Click-IT AHA (L-Azidohomoalanine)                           | Thermo Fisher Scientific | Cat# C10102                         |
| DMEM, high glucose, no glutamine, no methionine, no cystine | Thermo Fisher Scientific | Cat# 21013024                       |
| IRDye 800CW DBCO Infrared Dye                               | LI-COR                   | Cat# 929-50000                      |
| T7 Endonuclease I                                           | NEB                      | Cat# M0302L                         |
| IL-2                                                        | UCSF Pharmacy            | N/A                                 |
| IL-7 Recombinant Human Protein                              | Thermo Fisher Scientific | Cat# PHC0073                        |

|                                               |                          |                                  |
|-----------------------------------------------|--------------------------|----------------------------------|
|                                               |                          |                                  |
| IL-15 Recombinant Human Protein               | Thermo Fisher Scientific | Cat# PHC9153                     |
| Ghost Dye™ Red 780                            | Tonbo Biosciences        | Cat# 13-0865                     |
| <b>Experimental Models: Cell Lines</b>        |                          |                                  |
| HEK 293 Cell Line                             | ATCC                     | Cat# CRL-1573,<br>RRID:CVCL_0045 |
| V5-RPL40 HEK Cell Line                        | This Paper               | None                             |
| HA-RPS27A HEK Cell Line                       | This Paper               | None                             |
| Myc-UBC HEK Cell Line                         | This Paper               | None                             |
| Flp-In-T-REx-293 Cell Line                    | Invitrogen               | Cat# R78007,<br>RRID:CVCL_U427   |
| pCMV-RPS27A-SBP Flp-In-T-REx-293 Cell Line    | This Paper               | None                             |
| pCMV-Ub-RPS27A-SBP Flp-In-T-REx-293 Cell Line | This Paper               | None                             |

|                                                                                                                                                                     |                           |                              |
|---------------------------------------------------------------------------------------------------------------------------------------------------------------------|---------------------------|------------------------------|
| HEK 293T-BFP Cells                                                                                                                                                  | (Richardson et al., 2018) | None                         |
| K562-BFP Cells                                                                                                                                                      | (Richardson et al., 2018) | None                         |
| Mobilized Peripheral Blood CD34+ Stem/Progenitor Cells                                                                                                              | AllCells                  | Cat# mPB015F, RRID: none     |
| K-562 Cell Line                                                                                                                                                     | ATCC                      | Cat# CCL-243, RRID:CVCL_0004 |
| Human Dermal Fibroblasts-Neonatal                                                                                                                                   | ScienCell                 | Cat# 2310, RRID: none        |
| <b>Oligonucleotides</b>                                                                                                                                             |                           |                              |
| T7FwdAmp, forward oligo for sgRNA production:<br>GGATCCTAATACGACTCACTATAG                                                                                           | (Lingeman et al., 2017)   | N/A                          |
| T7RevAmp, reverse oligo for sgRNA production: AAAAAAGCACCGACTCGG                                                                                                    | (Lingeman et al., 2017)   | N/A                          |
| T7RevLong, oligo for sgRNA production:<br>AAAAAAGCACCGACTCGGTGCCACTT<br>TTTCAAGTTGATAACGGACTAGCCTTA<br>TTTTAACTTGCTATTTCTAGCTCTAAA<br>AC                            | (Lingeman et al., 2017)   | N/A                          |
| T7FwdVar oligo for <i>sgJAK2</i> production (guide sequence in <b>bold</b> ):<br>GGATCCTAATACGACTCACTATAG <b>TC</b><br><b>AGTTTCAGGATCACAGCTGTTTTAGA</b><br>GCTAGAA | This Paper                | N/A                          |
| T7FwdVar oligo for <i>sgRPS27A</i> production:<br>GGATCCTAATACGACTCACTATAG <b>AC</b>                                                                                | This Paper                | N/A                          |



|                                                                                                                                                                  |                           |     |
|------------------------------------------------------------------------------------------------------------------------------------------------------------------|---------------------------|-----|
| <b>CATCACCTCGAGGTACGTTTTAGAG<br/>CTAGAA</b>                                                                                                                      |                           |     |
| T7FwdVar oligo for <i>sgRPL40</i> production:<br>GGATCCTAATACGACTCACTATAGTC<br><b>CTCCTGCAGACGCAAACGTTTTAGAG</b><br>CTAGAA                                       | This Paper                | N/A |
| T7FwdVar oligo for <i>sgUBC</i> production:<br>GGATCCTAATACGACTCACTATAGGT<br><b>TTTGA</b> ACTATGCGCTCGTTTTAGAG<br>CTAGAA                                         | This Paper                | N/A |
| T7FwdVar oligo for <i>sgBFP</i> production :<br>GGATCCTAATACGACTCACTATAGCT<br><b>GAAGCACTGCACGCCATGTTTTAGAG</b><br>CTAGAA                                        | (Richardson et al., 2018) | N/A |
| T7FwdVar oligo for <i>sgAAVS1</i> production:<br>GGATCCTAATACGACTCACTATAGTG<br><b>TCCCTAGTGGCCCCACTGGTTTTAGA</b><br>GCTAGAA                                      | (Richardson et al., 2016) | N/A |
| <i>JAK2</i> T7E1 Assay forward primer:<br>CCTCAGAACGTTGATGGCAGTT                                                                                                 | This Paper                | N/A |
| <i>JAK2</i> T7E1 Assay reverse primer:<br>CTCTATTGTTTGGGCATTGTAACC                                                                                               | This Paper                | N/A |
| <i>JAK2</i> RT-qPCR forward primer:<br>AACTGCATGAAACAGAAGTTCTT                                                                                                   | This Paper                | N/A |
| <i>JAK2</i> RT-qPCR reverse primer:<br>GCATGGCCCATGCCAACTGT                                                                                                      | This Paper                | N/A |
| ssODN donor for <i>HA-RPS27A</i> editing:<br>ACCTGTCTCTTCTTTTCCTCAACCTC<br>AGGTGGAGCCGCCACCAAATGTACC<br>CATACGATGTTCCAGATTACGCTGGT<br>GGATCTGGAGGTTCTGGTGGAATGCA | This Paper                | N/A |

|                                                                                                                                                                                                                                                                                  |                            |     |
|----------------------------------------------------------------------------------------------------------------------------------------------------------------------------------------------------------------------------------------------------------------------------------|----------------------------|-----|
| GATTTTCGTGAAAACCCTTACGGGGA<br>AGACCATCACCTCGAGGTACGAGCC<br>GGGTGGTCATGAGGAAGCCAAGGTC<br>CGAATAAGGTCCTGAGGT                                                                                                                                                                       |                            |     |
| ssODN donor for <i>V5-RPL40</i> editing:<br>GCACCTGAGCTTGTGCTACTCAGGCA<br>TGCATTGCTCACCAGTCTATCCTGCC<br>TCACTTCCTCCTGCAGACGCAAACAT<br>GGGGAAGCCCATAACCAAACCCACTAC<br>TAGGTCTGGATTCTACGGGTGGATCT<br>GGAGGTTCTGGTGGAATGCAGATCTT<br>TGTGAAGACCCTCACTGGCAAACCA<br>TCACCCTTGAGGTCGAGC | This Paper                 | N/A |
| Forward primer for TOPO cloning <i>V5-RPL40</i> :<br>CCAGGGTGTGTGAGAAGCCTA                                                                                                                                                                                                       | This paper                 | N/A |
| Reverse primer for TOPO cloning <i>V5-RPL40</i> :<br>CAACCCACACAGGACTGAGACTC                                                                                                                                                                                                     | This paper                 | N/A |
| Forward primer for TOPO cloning <i>HA-RPS27A</i> :<br>GGTGCCTTCTCTTGTGATCCCT                                                                                                                                                                                                     | This paper                 | N/A |
| Reverse primer for TOPO cloning <i>HA-RPS27A</i> :<br>CTAAGACATGGAAAGCAGCGCC                                                                                                                                                                                                     | This paper                 | N/A |
| Forward primer for TOPO cloning <i>Myc-UBC</i> : AAGACCCGTCCATCTCGCAG                                                                                                                                                                                                            | This paper                 | N/A |
| Reverse primer for TOPO cloning <i>Myc-UBC</i> :<br>GATGTTGTAGTCAGACAGGGTGC                                                                                                                                                                                                      | This paper                 | N/A |
| Forward genotyping primer for pCMV-RPS27A-SBP and pCMV-Ub-RPS27A-SBP Flp-In-T-REx-293 Cell Lines (pCMV):                                                                                                                                                                         | UC Berkeley DNA Sequencing | N/A |

|                                                                                                                                            |                                     |                           |
|--------------------------------------------------------------------------------------------------------------------------------------------|-------------------------------------|---------------------------|
| CGCAAATGGGCGGTAGGCGTG                                                                                                                      | Facility                            |                           |
| Reverse genotyping primer for pCMV-RPS27A-SBP and pCMV-Ub-RPS27A-SBP Flp-In-T-REx-293 Cell Lines (BGH PolyA Signal):<br>TAGAAGGCACAGTCGAGG | UC Berkeley DNA Sequencing Facility | N/A                       |
| <i>RPL40</i> qPCR forward primer:<br>GGTGGCATTATTGAGCCTTCT                                                                                 | (Vihervaara et al., 2013)           | N/A                       |
| <i>RPL40</i> qPCR reverse primer:<br>GTGAAGGCGAGCATAGCACT                                                                                  | (Vihervaara et al., 2013)           | N/A                       |
| <i>RPS27A</i> qPCR forward primer:<br>TGTCTCTTCCTTTTCCTCAACC                                                                               | (Vihervaara et al., 2013)           | N/A                       |
| <i>RPS27A</i> qPCR reverse primer:<br>CTATCGTATCCGAGGGTTCAA                                                                                | (Vihervaara et al., 2013)           | N/A                       |
| ON-TARGETplus Non-Targeting siRNA Pool                                                                                                     | Dharmacon                           | Cat# D-001810-10-05       |
| Human ON-TARGETplus SMARTpool <i>siMDM2</i>                                                                                                | Dharmacon                           | Cat# L-003279-00          |
| <i>siZNF598</i> :<br>GAAAGGUGUACGCAUUGUAUU                                                                                                 | (Sundaramoorthy et al., 2017)       | Dharmacon A4 Custom siRNA |
| <i>siβ-TRCP</i> : GUGGAAUUUGUGGAACAU                                                                                                       | (Loveless et al., 2015)             | Dharmacon A4 Custom siRNA |
| <i>siPKR</i> : GAGAAUUUCCAGAAGGUGA                                                                                                         | (Watanabe et al., 2013)             | Dharmacon A4 Custom siRNA |
| Edit-R custom <i>CD34 crRNA</i> , guide sequence:<br>UUGCUUCUGGUGCUGCAACU                                                                  | (Hultquist et al., 2016)            | Dharmacon                 |

|                                                                                                         |                                      |                  |
|---------------------------------------------------------------------------------------------------------|--------------------------------------|------------------|
| Edit-R CRISPR-Cas9 Synthetic tracrRNA                                                                   | Dharmacon                            | Cat# U-002005-20 |
| PCR1 forward primer for NGS Analysis of <i>sgBFP</i> editing:<br>GCTCTTCCGATCTAGCTGGAC<br>GGCGACGTAAC   | (Richardson et al., 2018)            | N/A              |
| PCR1 reverse primer for NGS Analysis of <i>sgBFP</i> editing:<br>GCTCTTCCGATCTATGCGGTTCCAC<br>CAGGGTGTC | (Richardson et al., 2018)            | N/A              |
| <b>Recombinant DNA</b>                                                                                  |                                      |                  |
| pHA-Ub                                                                                                  | Gift from Rape Lab, UC Berkeley      | N/A              |
| pUC19                                                                                                   | Addgene;<br>(Norrander et al., 1983) | Cat# 50005       |
| pUC19-Myc-UBC                                                                                           | This paper                           | N/A              |
| pcDNA5/FRT/TO                                                                                           | Invitrogen                           | Cat# V652020     |
| pcDNA5/FRT/pCMV-RPS27A-SBP                                                                              | This paper                           | N/A              |
| pcDNA5/FRT/pCMV-Ub-RPS27A-SBP                                                                           | This paper                           | N/A              |
| pOG44 Flp-Recombinase Expression Vector                                                                 | Invitrogen                           | Cat# V600520     |
| pET His6 TEV LIC cloning vector (2B-T)                                                                  | Addgene                              | Cat# 29666       |

|                                |                               |                                                                                                                                                                  |
|--------------------------------|-------------------------------|------------------------------------------------------------------------------------------------------------------------------------------------------------------|
| pET His-TEV-Km-HNT3            | This paper                    | N/A                                                                                                                                                              |
| <b>Software and Algorithms</b> |                               |                                                                                                                                                                  |
| DESeq2                         | (Love et al., 2014)           | <a href="http://bioconductor.org/packages/release/bioc/html/DESeq2.html">http://bioconductor.org/packages/release/bioc/html/DESeq2.html</a> ;<br>RRID:SCR_015687 |
| TopHat                         | (Trapnell et al., 2009)       | RRID:SCR_013035                                                                                                                                                  |
| HiStat2                        | (Kim et al., 2015)            | RRID:SCR_015530                                                                                                                                                  |
| Samtools                       | (Li et al., 2009)             | <a href="http://samtools.sourceforge.net/">http://samtools.sourceforge.net/</a> ,<br>RRID:SCR_002105                                                             |
| ImageJ                         | (Schindelin et al., 2015)     | <a href="https://imagej.net/">https://imagej.net/</a> ,<br>RRID:SCR_003070                                                                                       |
| R (Version 3.3.2)              | r-project                     | RRID:SCR_001905                                                                                                                                                  |
| RStudio (Version 1.0.136)      | RStudio                       | RRID:SCR_000432                                                                                                                                                  |
| Logger Lite (Version 1.8)      | Vernier Software & Technology | RRID: None                                                                                                                                                       |
| FlowJo                         | Treestar Inc.                 | RRID:SCR_008520                                                                                                                                                  |
| NEEDLE                         | (Li et al., 2015).            | N/A                                                                                                                                                              |

|                                                                           |                          |                  |
|---------------------------------------------------------------------------|--------------------------|------------------|
| CRISPResso                                                                | (Pinello et al., 2016)   | N/A              |
| <b>Other</b>                                                              |                          |                  |
| TruSeq Stranded Total RNA Library Kit with Ribo-Zero Gold                 | Illumina                 | Cat# RS-122-2301 |
| Pierce Anti-HA Magnetic Beads Kit                                         | Thermo Fisher Scientific | Cat# 88836       |
| Dynabeads M-270 Streptavidin Beads                                        | Thermo Fisher Scientific | Cat# 65305       |
| EasySep Human CD4+ Cell Isolation Kit                                     | STEMCELL Technologies    | Cat# 17952       |
| Dynabeads™ Human T-Activator CD3/CD28 for T Cell Expansion and Activation | Thermo Fisher Scientific | Cat# 11131D      |
| Sera-Mag SpeedBeads® Carboxyl Magnetic Beads                              | GE Healthcare            | Cat# 09-981-123  |

1320

1321 **Supplemental Information**

1322 **Table S1: NGS Allele Frequency Analysis (rel to Fig. 5)**

1323 Sheet 1: Summary of Alignments and Indel Frequencies

1324 Sheets 2-12: Allele Frequencies per NGS Sample

1325 **Table S2: Ribosome Profiling and RNA-seq DESeq2 Analysis (rel to Fig. 6)**

1326 Sheet 1: Ribosome Profiling, 36 Hours

1327 Sheet 2: RNA-seq, 36 Hours

1328 Sheet 3: Translational Efficiency, 36 Hours

1329 Sheet 4: Ribosome Profiling, 72 Hours

1330 Sheet 5: RNA-seq, 72 Hours

1331 Sheet 6: Translational Efficiency, 72 Hours

1332 **Table S3: Target Gene Lists for CDF Plots (rel to Fig. 6 and Fig. S6)**

1333 Sheet 1: Integrated Stress Response (ISR) Genes, (Sidrauski et al., 2015)

1334 Sheet 2: Ribosome Protein Genes

1335 Sheet 3: DSB Repair Genes, union of genes annotated as DSB repair genes

1336 from (Chae et al., 2016) and University of Pittsburgh Cancer Institute's DNA

1337 Repair Database

1338 Sheets 4-21: DESeq2 results for target genes that were used to generate

1339 Figures 6E-H and S6C. These gene lists represent the intersection of the target

1340 gene lists and all genes identified at 36 and 72 hours.

1341 **Supplemental Figure Legends**

1342 **Figure S1 (Related to Fig. 1). Ribosome proteins RPS27A and RPL40 are**  
1343 **downregulated after genome editing with Cas9**

1344

1345 (A) As in Figure 1A, showing recovery of RPS27A at 96 hours post-nucleofection.

1346

1347 (B) Genome editing does not affect *JAK2* mRNA abundance. Fold changes were  
1348 calculated using the  $2^{-\Delta\Delta C_t}$  method with Cas9 without sgIntron (apo Cas9) as the  
1349 control and *GAPDH* as the reference gene (n = 3, error bars = SD).



1350 **Figure S2 (Related to Fig. 2). Ubiquitins translated from *RPS27A* and *RPL40***  
1351 **decrease after dsDNA breaks**

1352

1353 (A) Western blotting of HEK 293 cell lines edited to introduce epitope tags at the  
1354 endogenous *RPL40*, *RPS27A*, and *UBC* loci.

1355

1356 (B) As in **Figure 2C**, nucelofection with dCas9 RNPs (72 hours) does not lead to  
1357 depletion of V5-Ub and HA-Ub, demonstrating that their depletion is due to Cas9  
1358 DSBs.

1359

1360 (C) Tagged ubiquitin expression in edited HEK cells after UV radiation (20 J/m<sup>2</sup>) or  
1361 treatment with 0.03% MMS for 1 hour.

1362 **Figure S3 (Related to Fig. 3). RPS27A is proteasomally degraded after dsDNA**  
1363 **damage**

1364  
1365 (A) Western blotting of RPS27A and SBP tag in HEK Flp-In cell lines with stable, single-  
1366 copies of *pCMV-Ub-RPS27A-SBP* or *pCMV-RPS27A-SBP* transgenes after 5  $\mu$ M  
1367 etoposide or DMSO treatment for 16 hours. Note that *RPS27A* transgenes lack the  
1368 endogenous promoter and UTR sequences.

1369  
1370 (B) Western blotting for K48, K63, and M1 ubiquitin linkages on affinity-purified  
1371 RPS27A-SBP indicates constitutive and etoposide-induced K48-linked ubiquitin  
1372 chains. HEK Flp-In cell lines expressing *pCMV-RPS27A-SBP* were treated with  
1373 epoxomicin (50  $\mu$ M, 17 hours) and etoposide (5  $\mu$ M, 16 hours).

1374  
1375 (C) Western blotting demonstrates RPS27A depletion is insensitive to *MDM2* knock-  
1376 down 16 hours after 5  $\mu$ M etoposide treatment or 72 hours after Cas9-sgIntron  
1377 nucleofection. Non-targeting siRNAs, DMSO, and Cas9 without a guide served as  
1378 negative controls.

1379  
1380 (D) Western blotting of RPL40 shows that nutlin (10  $\mu$ M) treatment rescues RPL40  
1381 depletion induced by etoposide (5  $\mu$ M) in HEK cells.

1382  
1383 (E) Abundance of *RPL40* transcripts increases after co-administration of nutlin and  
1384 etoposide.

1385  
1386 (F) Western blotting to monitor RPS27A and RPL40 after *ZNF598* knock-down relative  
1387 to a non-targeting control siRNA.

1388  
1389 (G) Western blotting against RPS27A protein following anti-HA immunoprecipitations  
1390 from HEK cell lysates transfected with a plasmid expressing HA-Ub. Cells were  
1391 transfected with siRNAs and, after 24 hours, with the HA-Ub plasmid. Lysates were  
1392 prepared 48 hours after the second transfection.

1393  
1394 (H) Western blotting against RPS27A protein following siRNA knockdown of  $\beta$ -*TRCP* (or  
1395 a non-targeting control siRNA) and etoposide treatment.

1396  
1397 (I) As in (G), using an HEK cell line expressing a single-copy *pCMV-RPS27A-SBP*  
1398 transgene.

1399 **Figure S4 (Related to Fig. 4) Double-strand DNA breaks lead to eIF2 $\alpha$**   
1400 **phosphorylation and reduced translation initiation**

- 1401  
1402 (A) IR800 LI-COR-image of SDS-PAGE gel with L-AHA labeled lysates depicted in  
1403 **(Figure 4H)**.  
1404  
1405 (B) Polysome profiles of HEK cells 72 hours after nucleofection with active Cas9-  
1406 sglIntron RNP, or Cas9 without guide (apo Cas9).  
1407  
1408 (C) Western blotting of ATF4 induction. Cells were harvested 72 hours after  
1409 nucleofection with Cas9-sglIntron or 16 hours after treatment with 5  $\mu$ M etoposide.  
1410 Cells treated with DMSO for 16 hours or 1  $\mu$ M thapsigargin for 30 minutes served as  
1411 negative and positive controls respectively.  
1412  
1413 (D) Examples of flow cytometry editing efficiency analysis of T-cells nucleofected with  
1414 Cas9-sgCD4 in tandem with cells depicted in **Figure 4F**. T-cells were stained with  
1415 anti-CD3-PE, anti-CD4-PE-Cy7, and GhostDye780 (to mark dead cells).  
1416  
1417 (E) Average percentage of edited, CD4 negative T-cells three days after Cas9-sgCD4  
1418 electroporation as determined by FACS (n = 3).  
1419  
1420 (F) Western blotting of eIF2 $\alpha$  (S51) phosphorylation in K562 cells treated with 5  $\mu$ M  
1421 etoposide.

1422 **Figure S5 (related to Fig. 5). Modulating eIF2 $\alpha$  phosphorylation alters genome**  
1423 **editing outcomes**

1424

1425 (A) Western blotting of eIF2 $\alpha$  (Ser51) phosphorylation in HEK-BFP cells treated with 75  
1426  $\mu$ M salubrinal or DMSO for 24 hours.

1427

1428 (B) T7 Endonuclease 1 cleavage assay. K562-BFP cells were nucleofected with sgBFP-  
1429 Cas9 (or dCas9) RNPs and treated with 10 or 50  $\mu$ M salubrinal for 16 hours.

1430

1431 (C) Mutation distribution plots of NGS reads with insertions or deletions (% reads with  
1432 indels) from gDNA PCRs of HEK-BFP cells nucleofected with sgBFP-Cas9 (or  
1433 dCas9) RNPs and treated with 75  $\mu$ M salubrinal or 200 nM ISRIB for 24 hours.

1434 **Figure S6 (Related to Fig.6). Genome editing initiates a translational response**  
1435 **that proceeds long-term transcriptional changes**

1436

1437 (A) As in **Figure 6C**, with pink marking genes with significant changes in translation  
1438 efficiency, the ratio of ribosome footprints to mRNA transcripts (Wald test, FDR  
1439 adjusted  $p$ -value < 0.1).

1440

1441 (B) As in (A) for 72-hour ribosome profiling and RNA sequencing data.

1442

1443 (C) As in Figures 6E through 6H, for translation efficiency. See **Table S3** for target gene  
1444 lists.

# Figure 1. Ribosome proteins RPS27A and RPL40 are downregulated after genome editing with Cas9

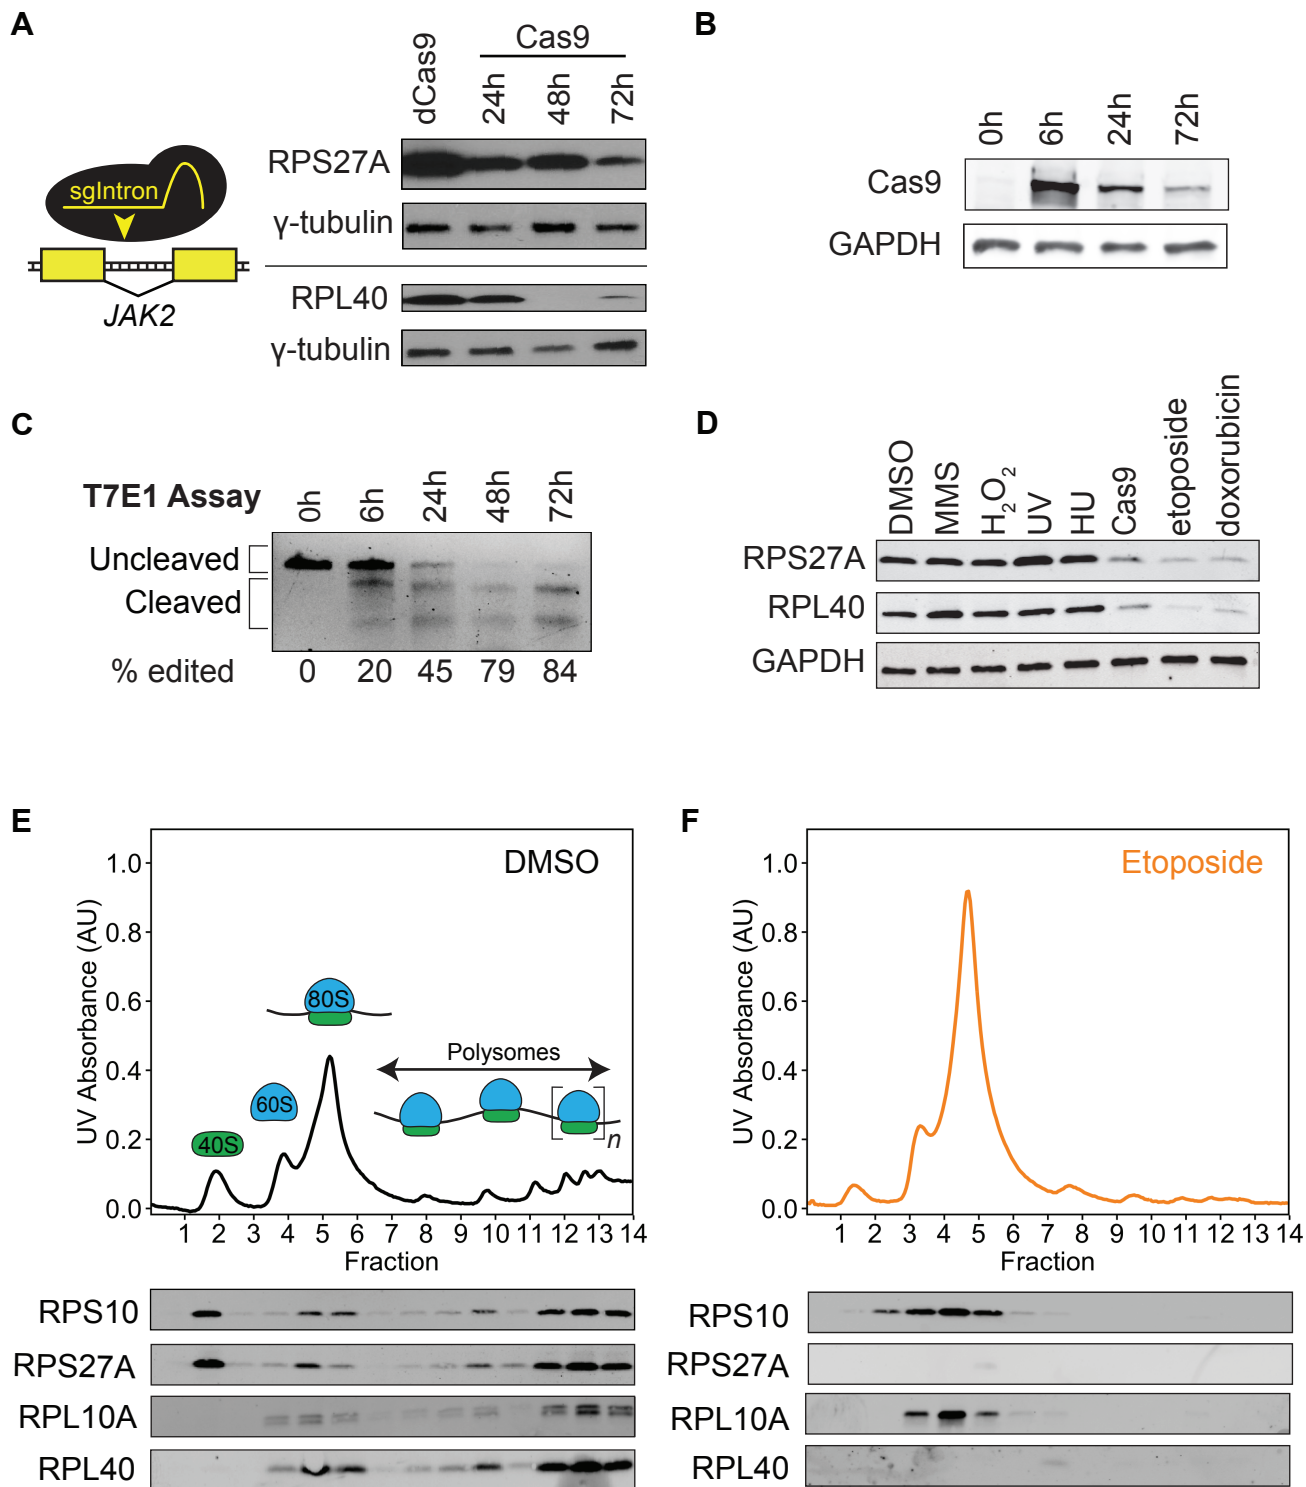

**A**

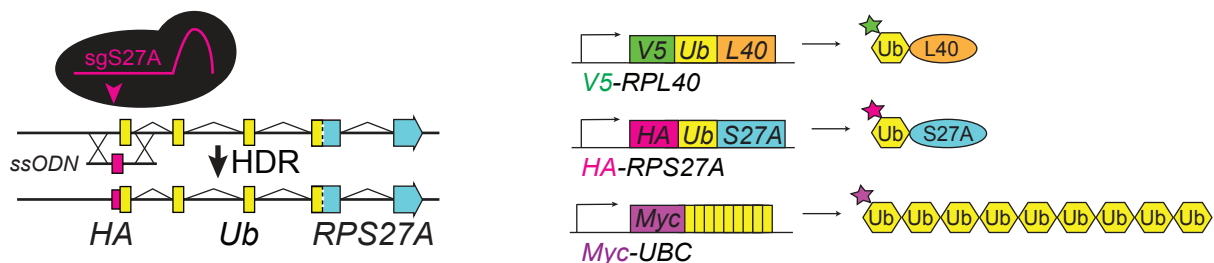

**B**

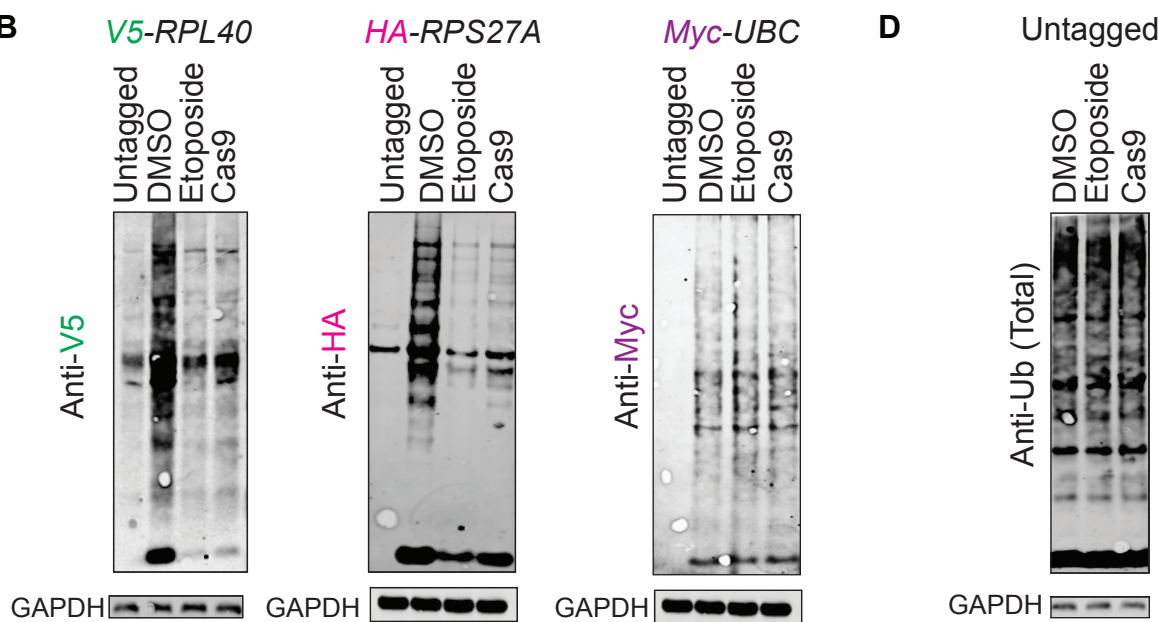

**C**

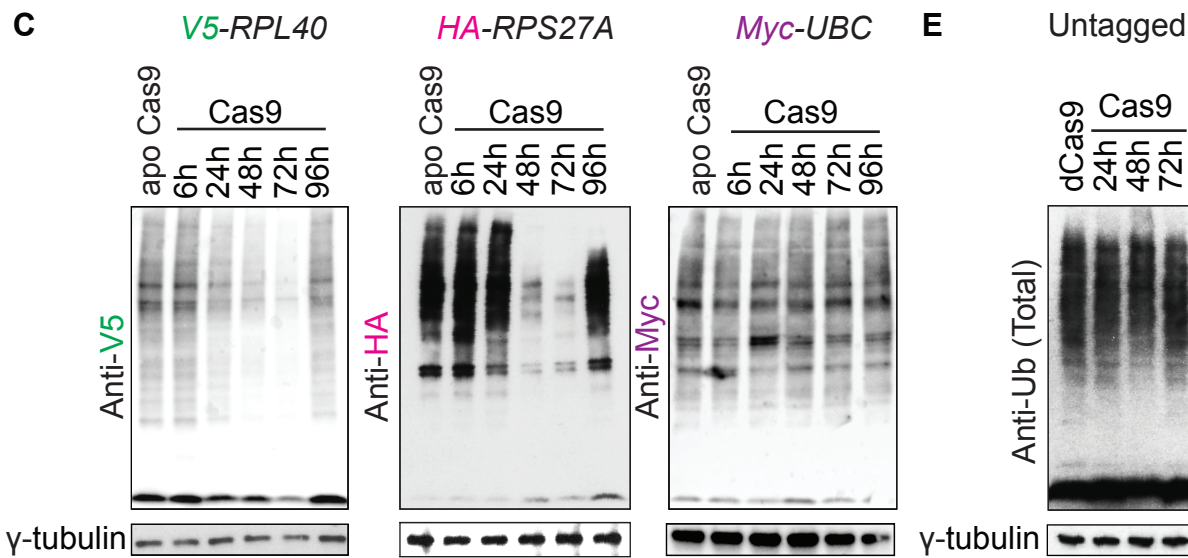

**E**

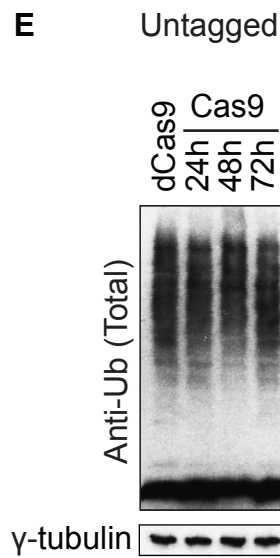

**Figure 3. RPS27A is proteasomally degraded after dsDNA breaks**

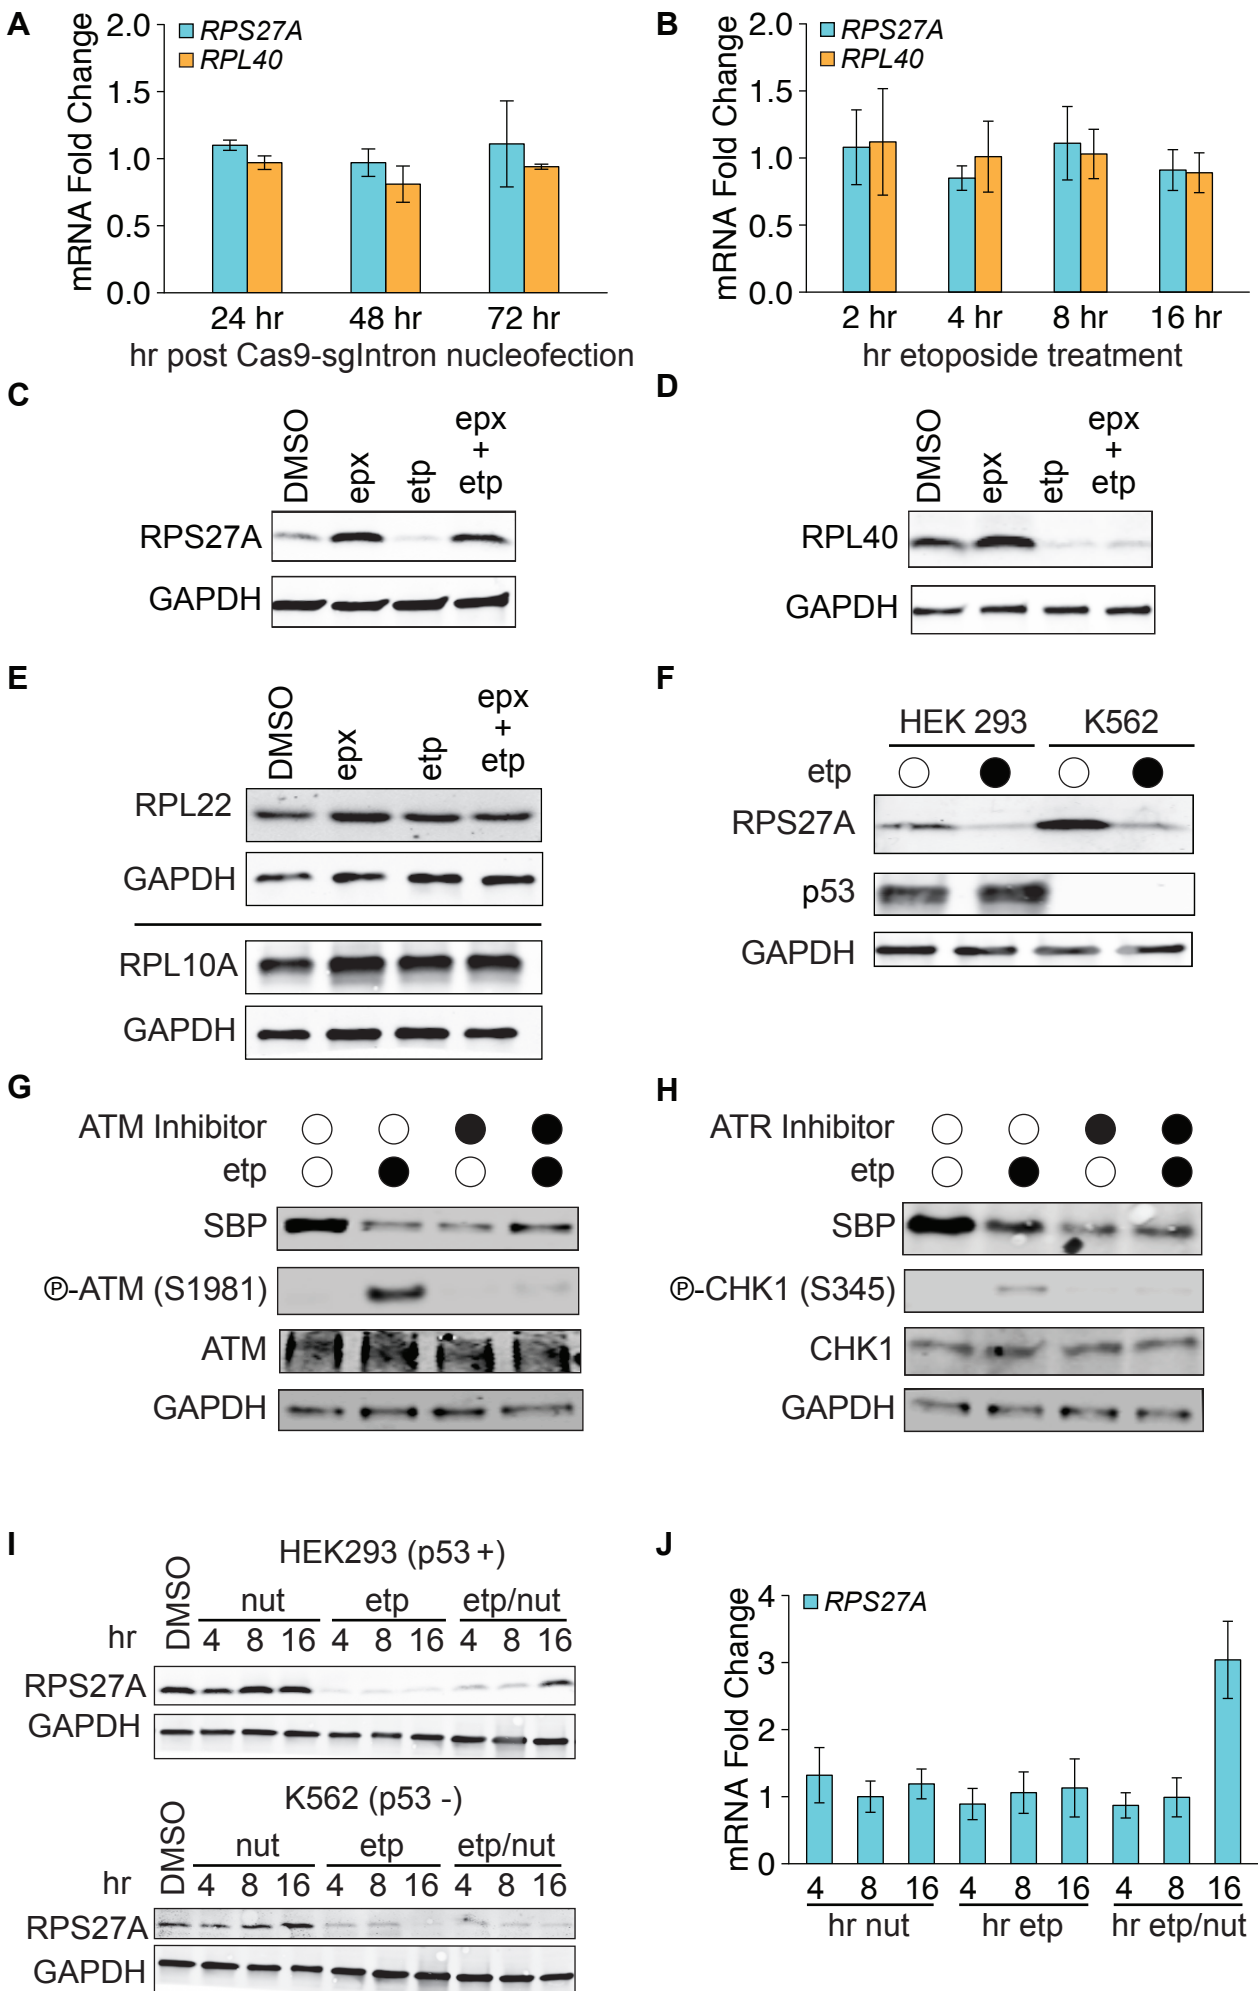



**Figure 4. Double-strand DNA breaks lead to eIF2 $\alpha$  phosphorylation and reduced translation initiation**

**A**

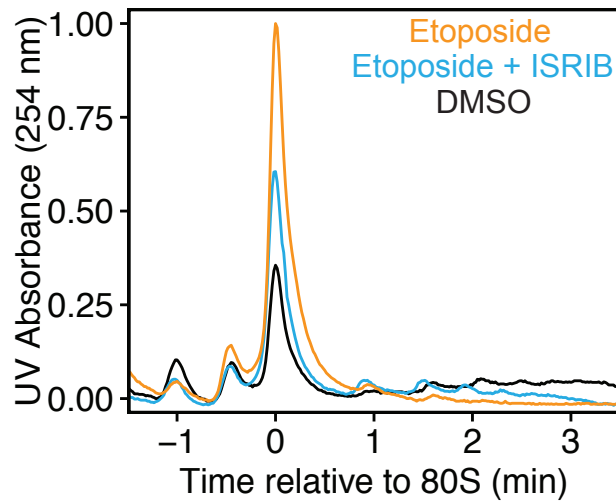

**B**

**AHA Bulk Translation Assay**

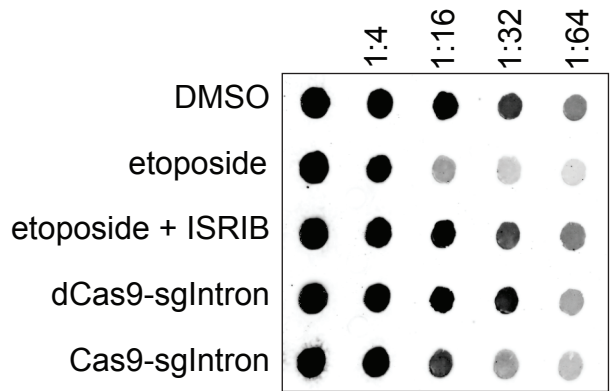

**C**

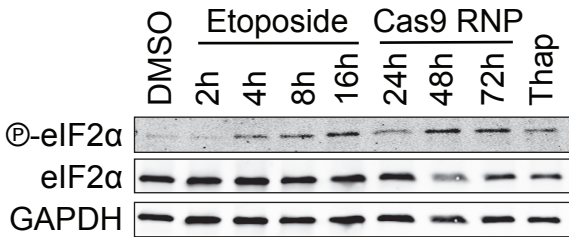

**E**

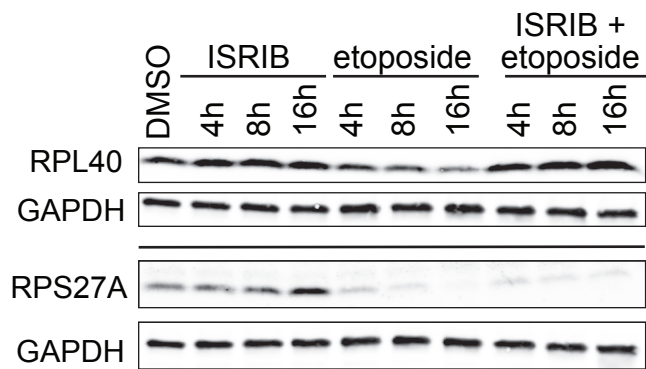

**D**

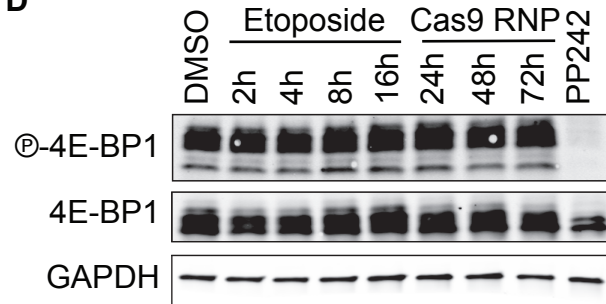

**F**

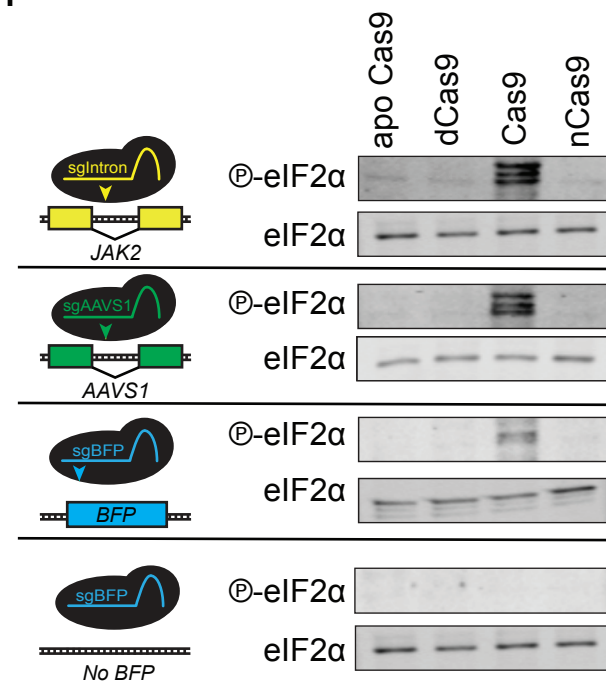

**G**

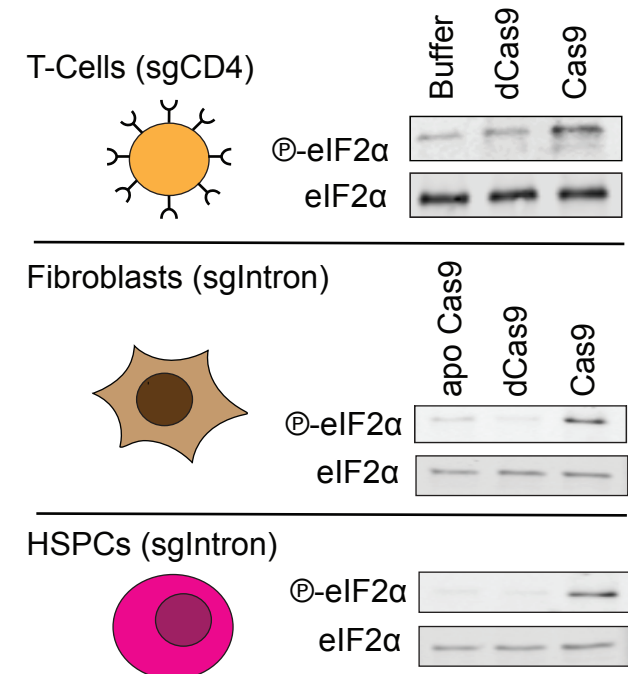

## Figure 5: Modulating eIF2 $\alpha$ phosphorylation alters genome editing outcomes

**A**

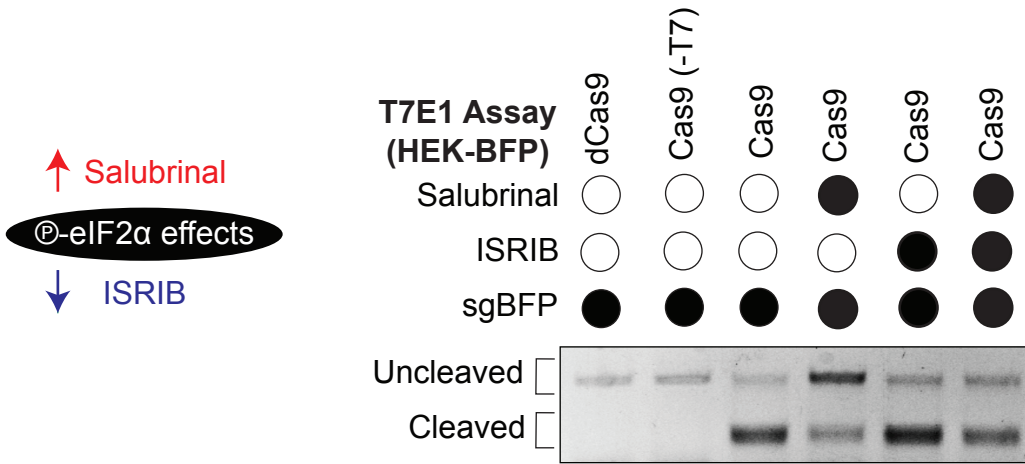

**B**

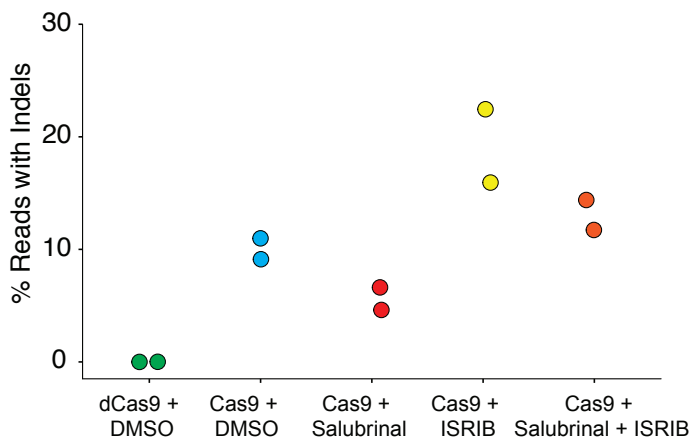

**C**

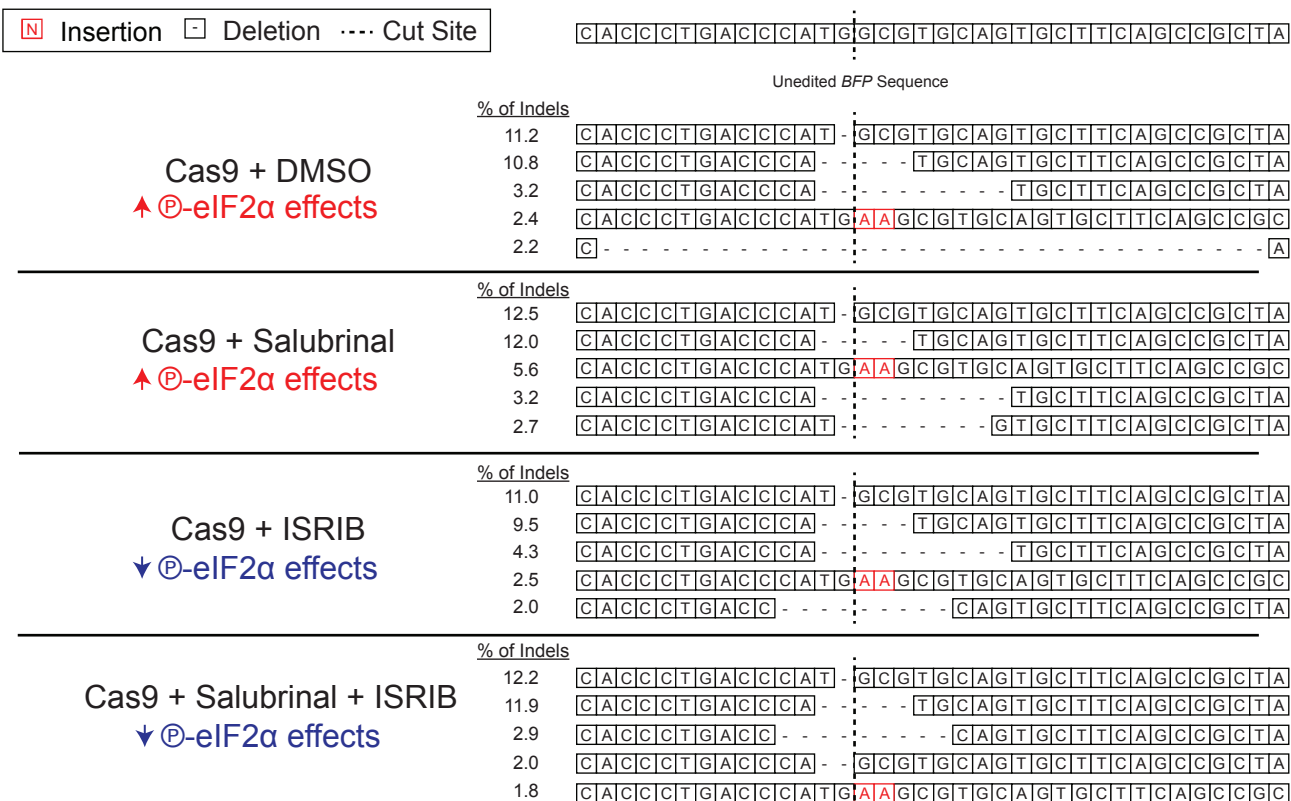

# Figure 6. Genome editing initiates a translational response that precedes long-term transcriptional changes

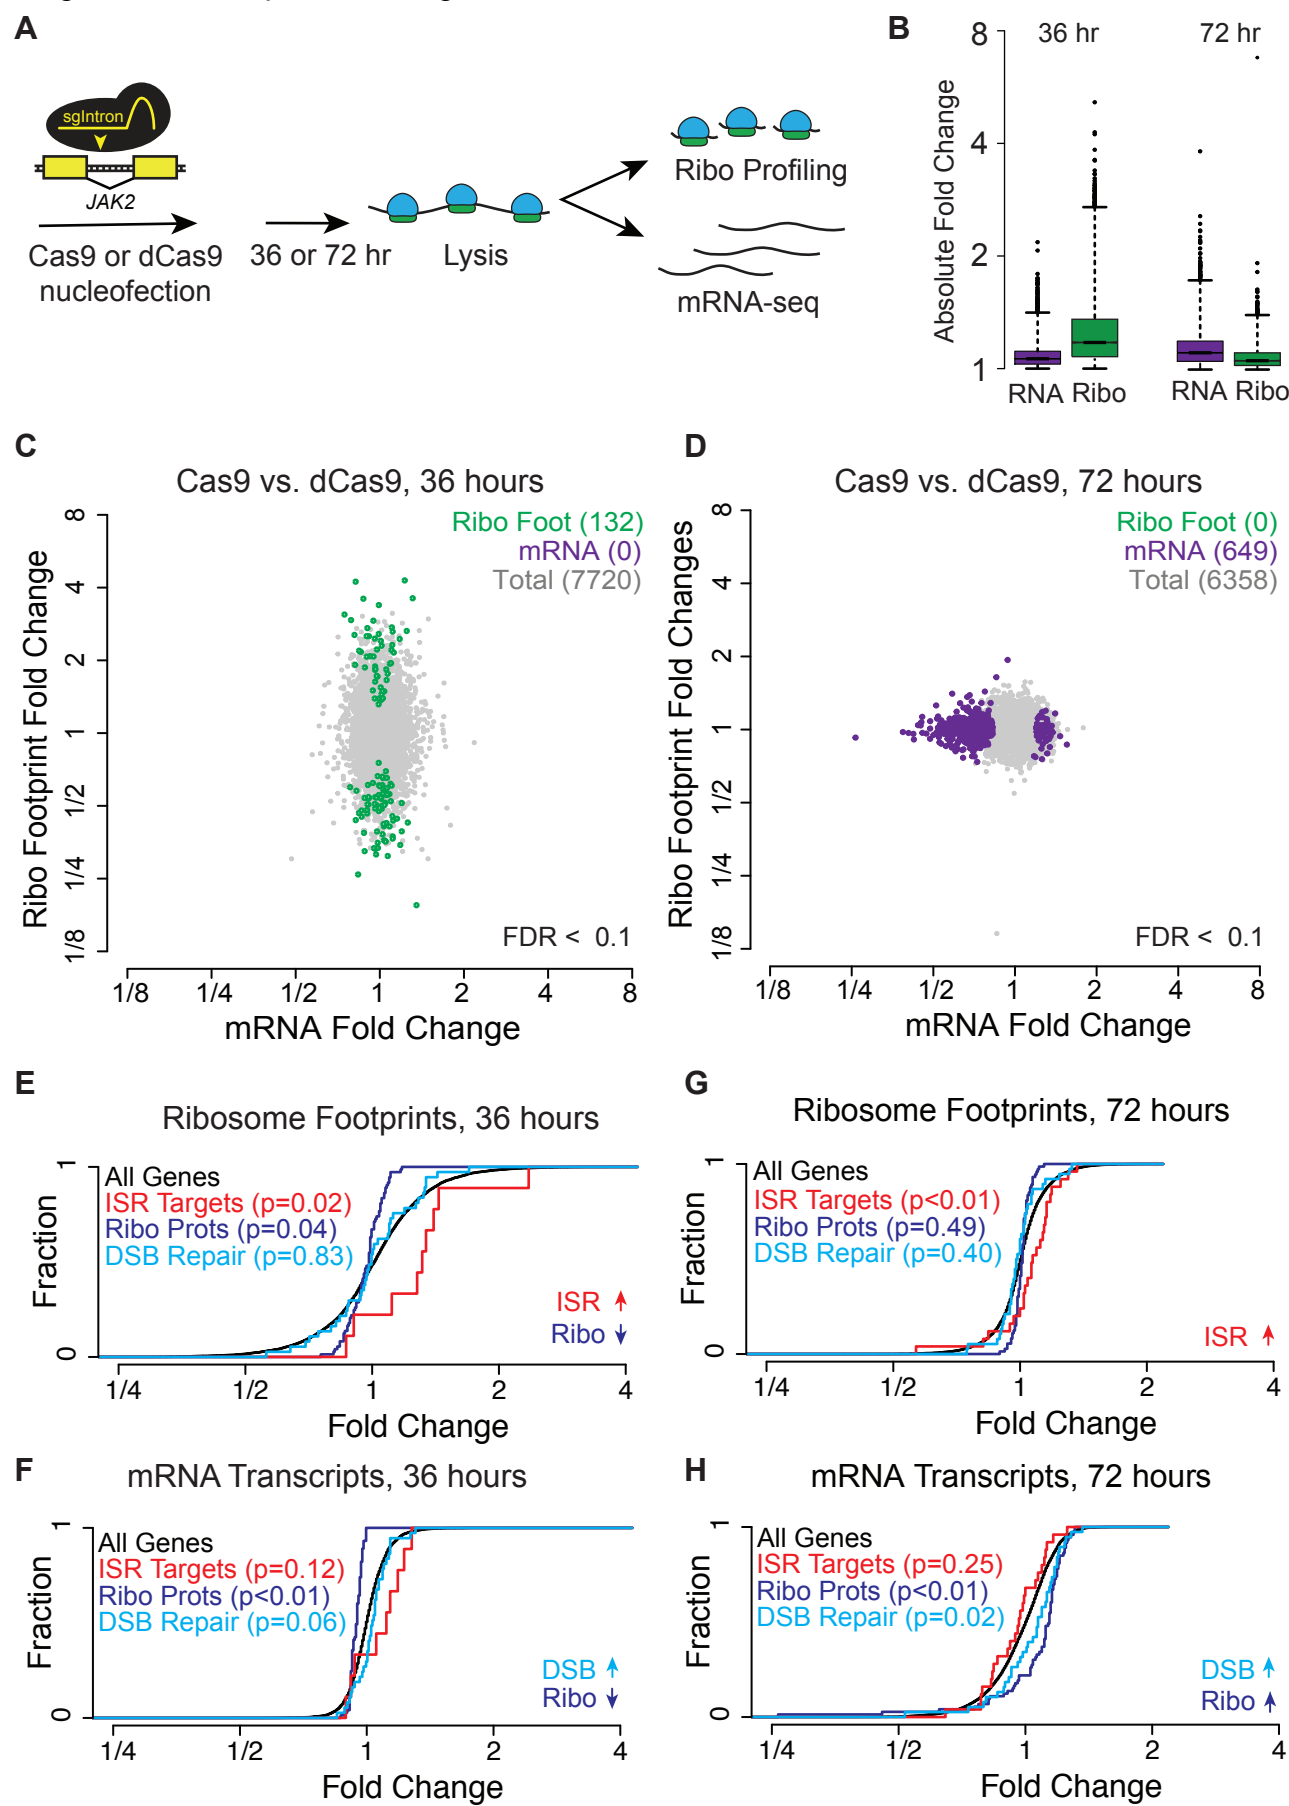

# Figure S1. Ribosome proteins RPS27A and RPL40 are downregulated after Cas9 genome editing

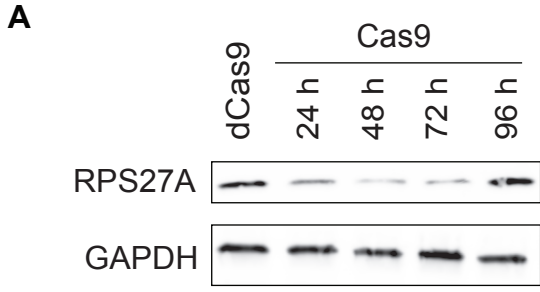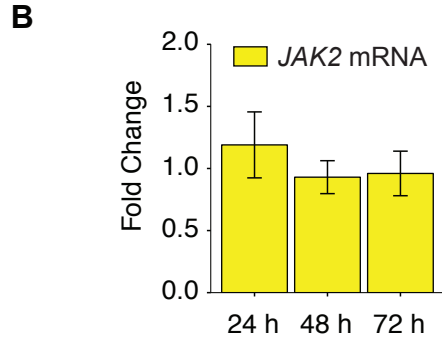

## Figure S2 (Related to Fig. 2) Ubiquitins translated from RPS27A and RPL40 decrease after dsDNA breaks

**A**

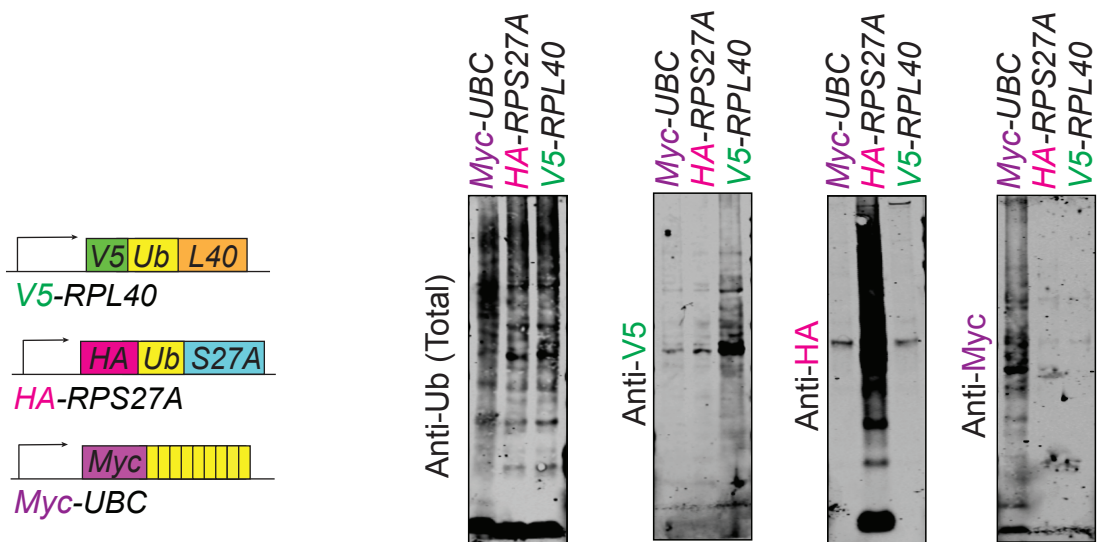

**B**

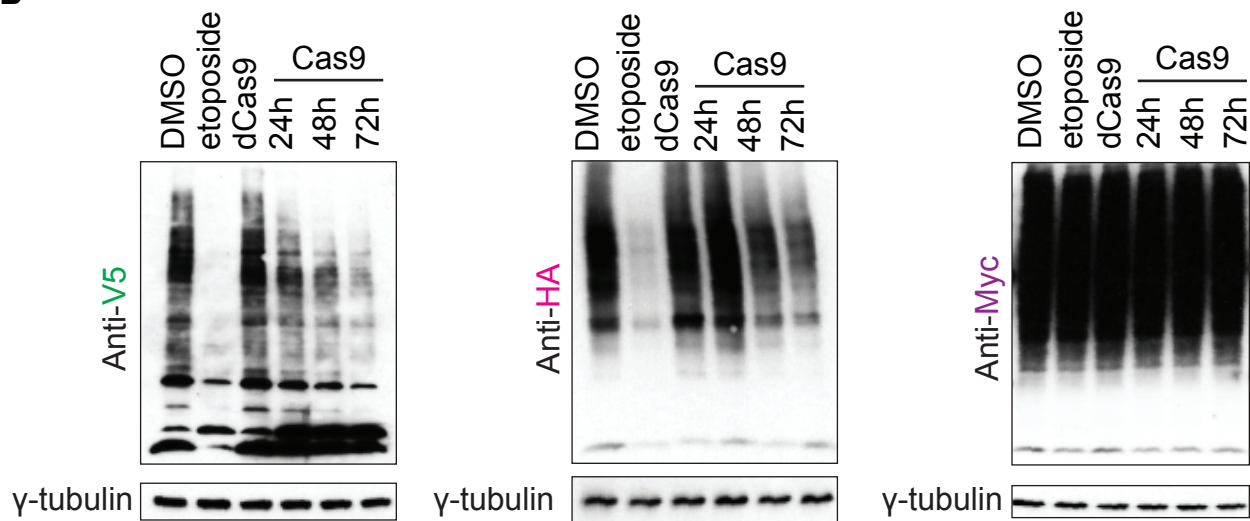

**C**

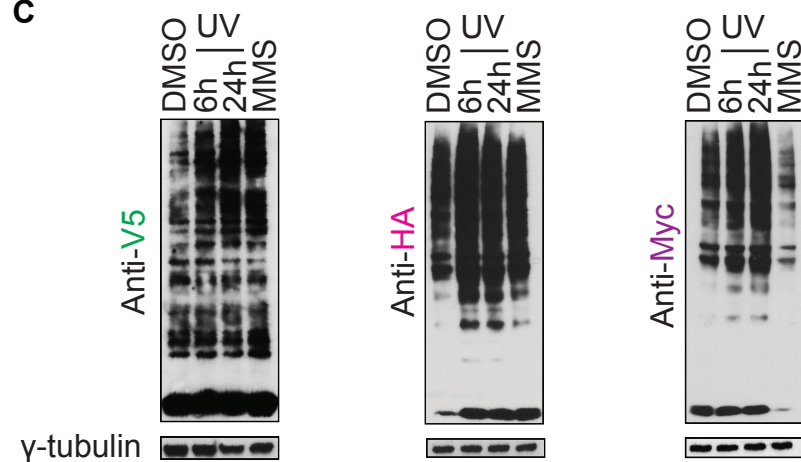

**Figure S3 (Related to Fig. 3) RPS27A is proteasomally degraded after dsDNA breaks**

**A**

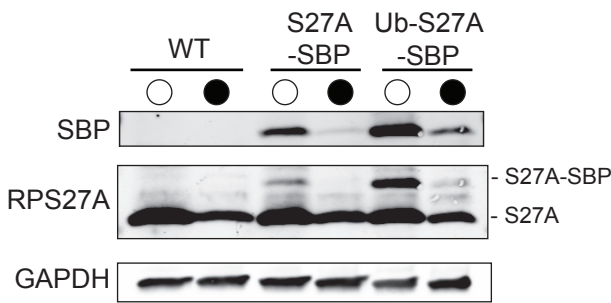

**B**

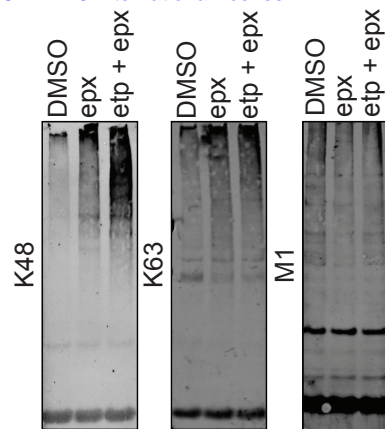

**C**

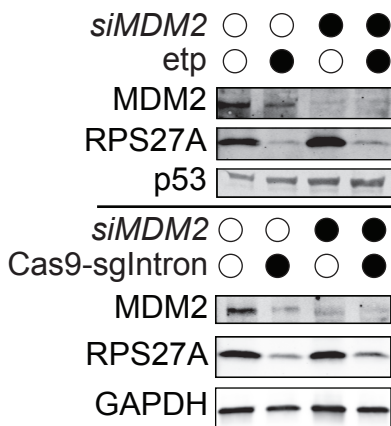

**D**

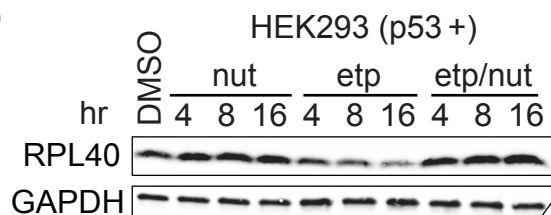

**E**

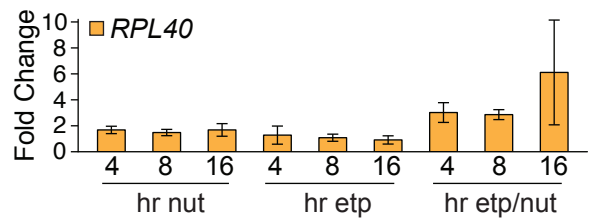

**F**

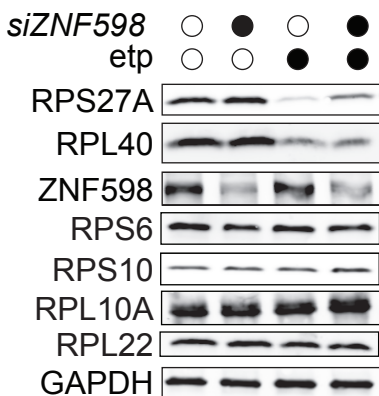

**G**

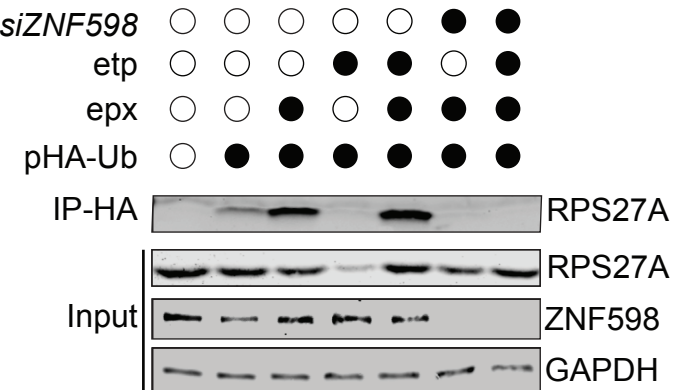

**H**

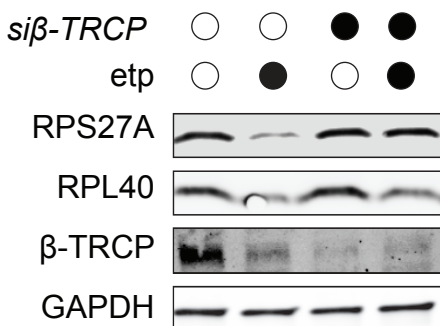

**I**

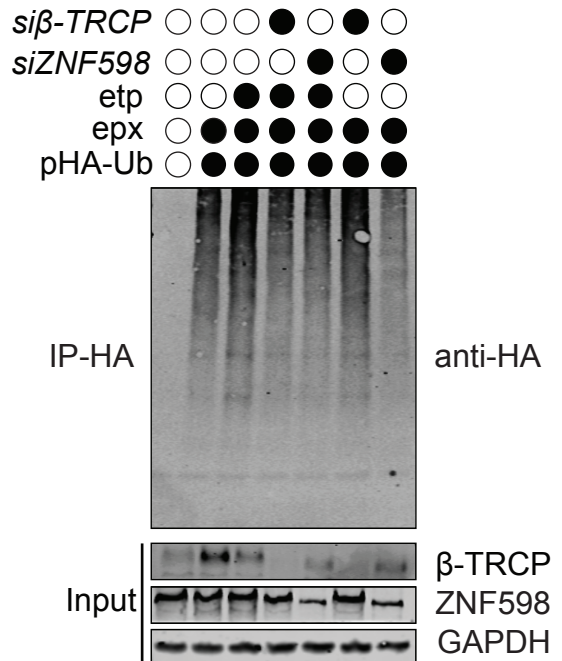

**Figure S4 (related to Fig. 4): Double-strand DNA breaks lead to eIF2 $\alpha$  phosphorylation and reduced translation initiation**

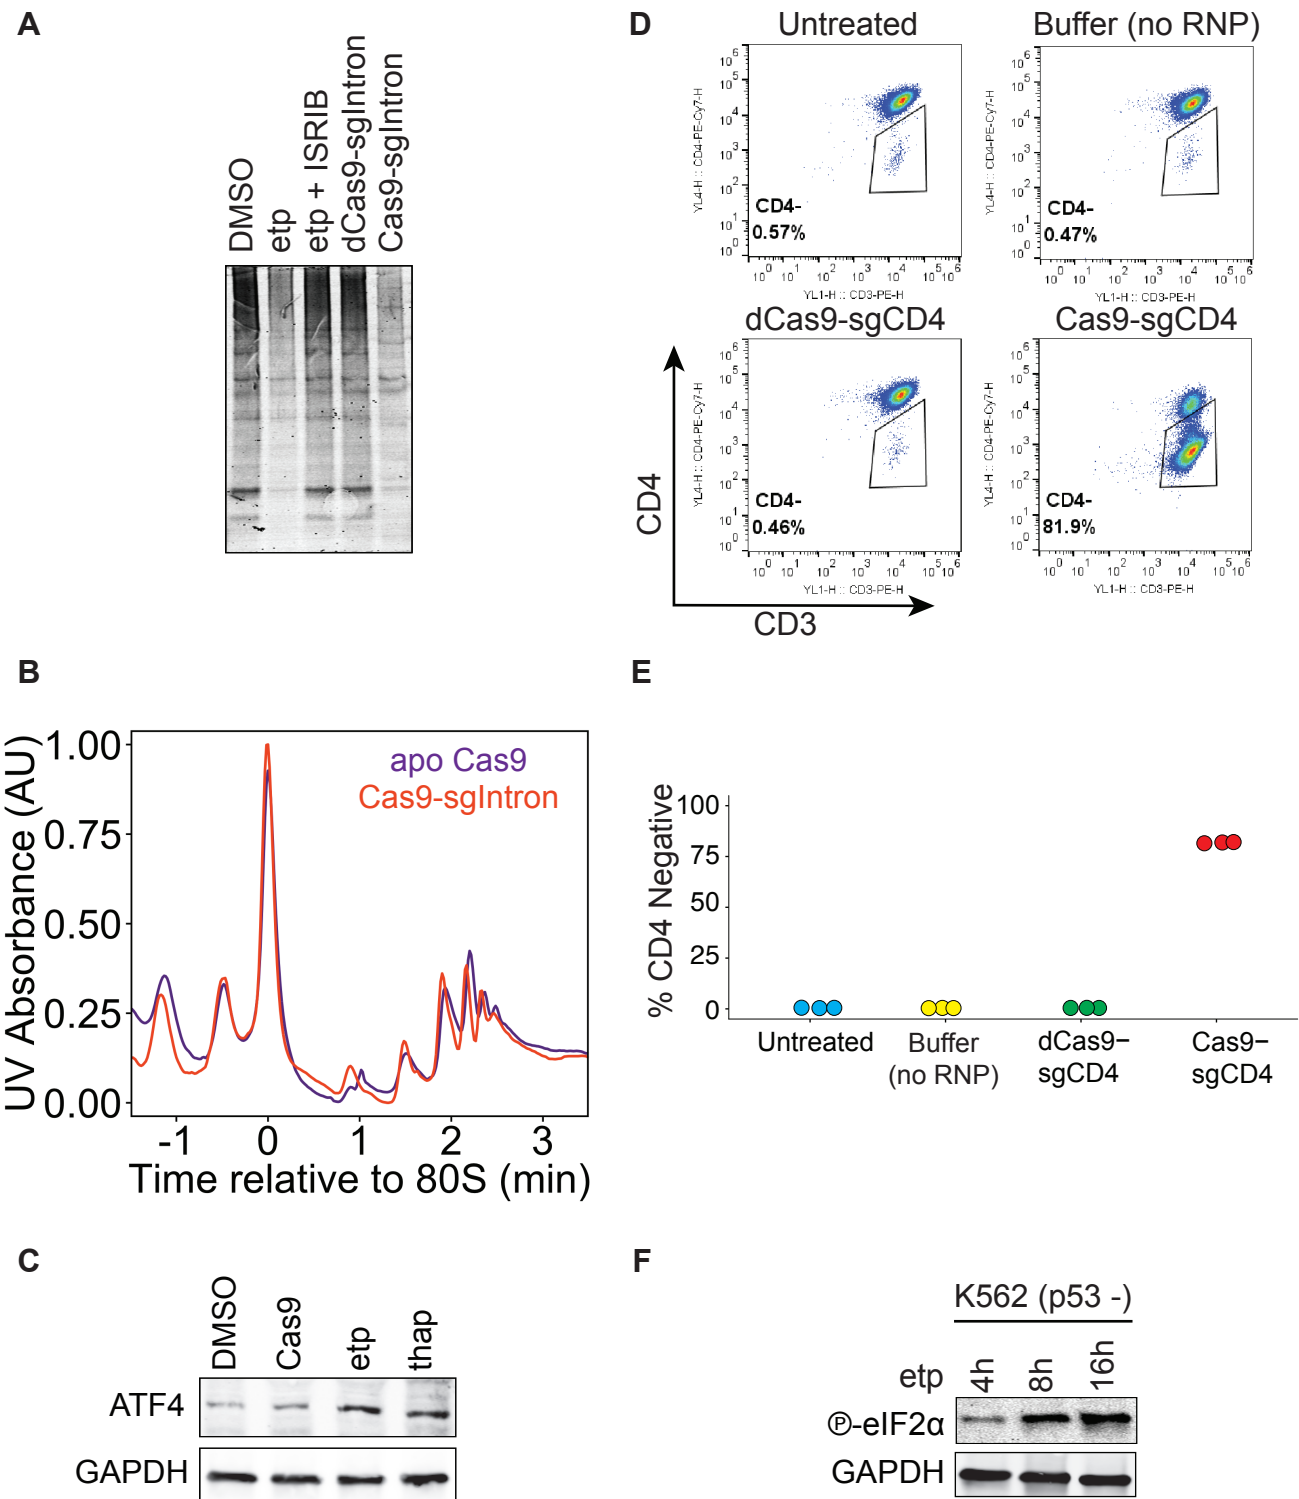

## Figure S5 (related to Fig. 5). Modulating eIF-2 $\alpha$ phosphorylation alters genome editing outcomes

**A**

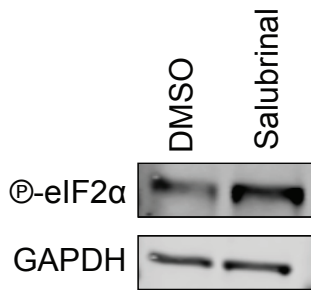

**B**

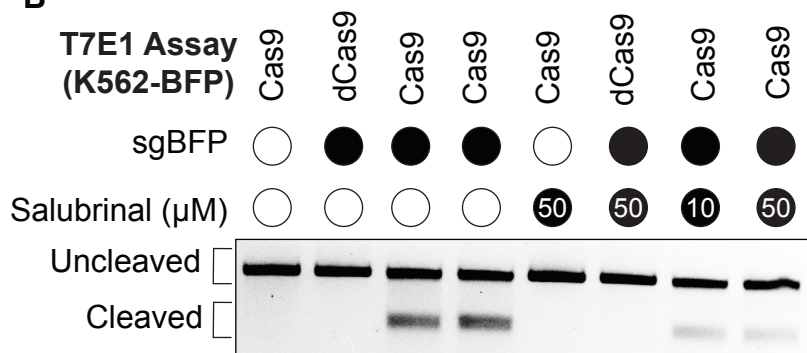

**C**

### Mutation Position Distribution

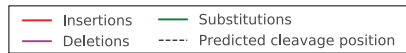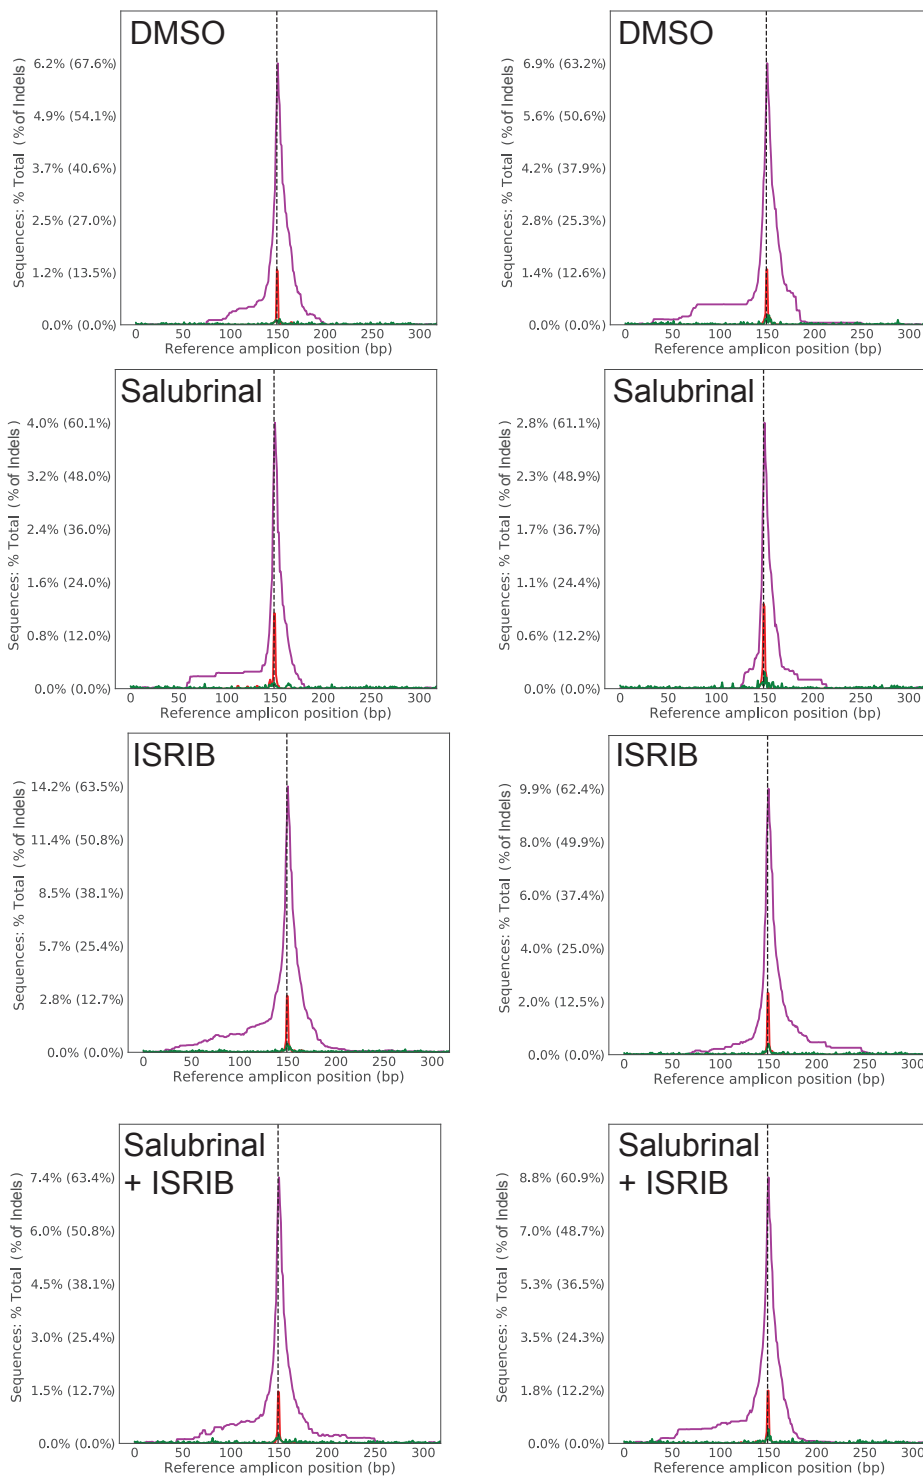



# Figure S6 (Related to Fig. 6) Genome editing induces a translational response that precedes long-term transcriptional changes

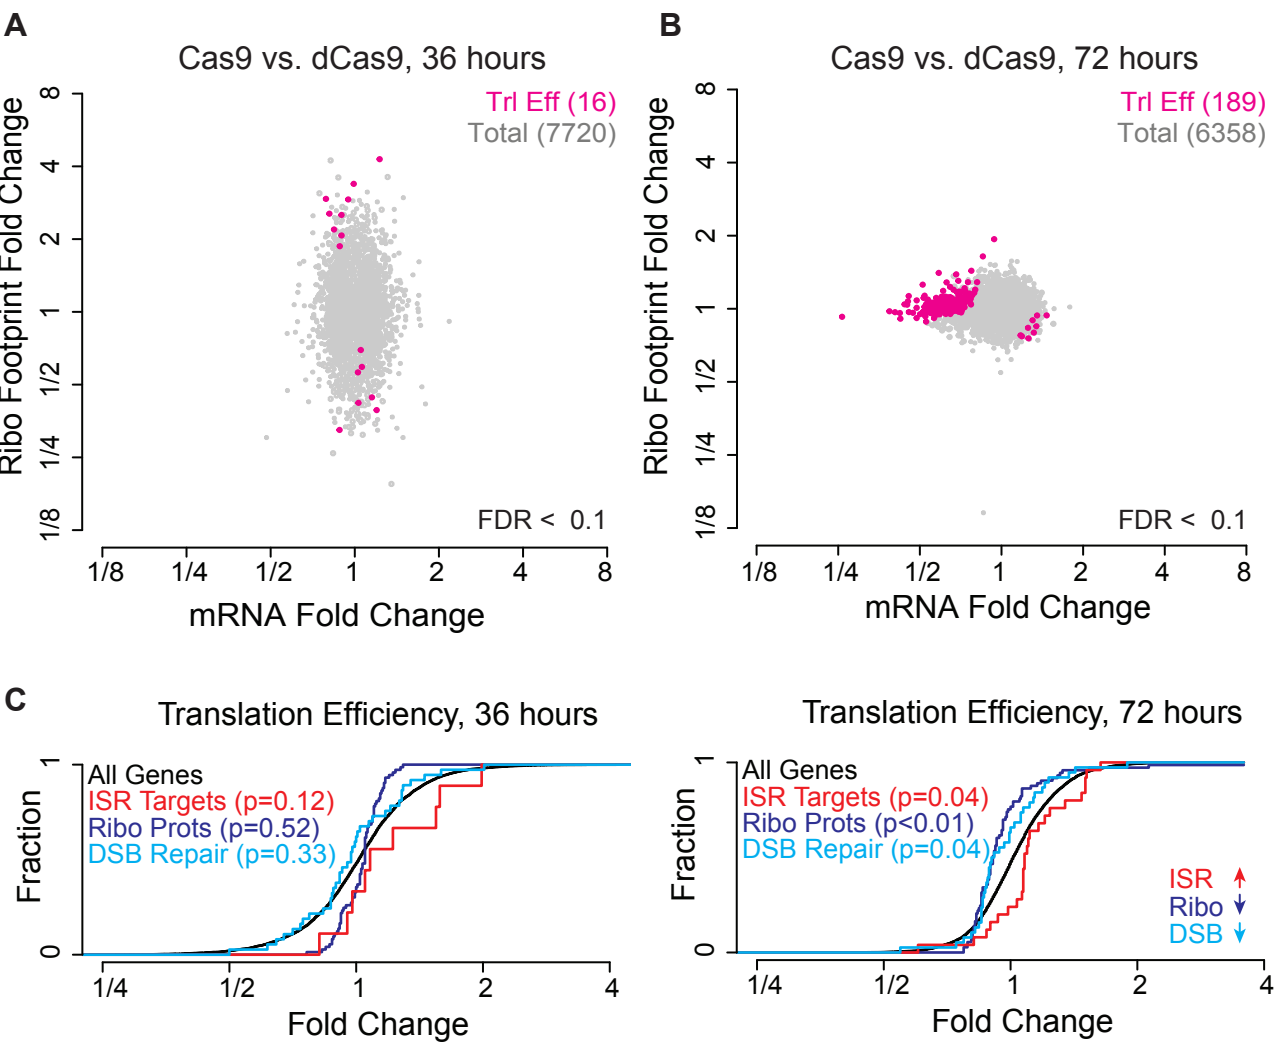

Source: https://www.biorxiv.org/content/biorxiv/early/2018/12/05/486704.full.pdf
